# Supplementary material for: Bipodonines A–J, a new class of natural sesquiterpenes with a 2-(tetrahydro-2H-pyran-2-yl)propan-2-ol system from the fungus Bipolaris cynodontis DJWT-01
Source: Royal Society of Chemistry journal article supplement (doi:10.1039/d3qo00235g), 2023-01-01
Supplement: d3qo00235g1.pdf [file d3qo00235g1.pdf]

Supporting Information for

**Bipodonines A-J, a new class of natural sesquiterpenes with 2-(tetrahydro-2*H*-pyran-2-yl)propan-2-ol system from the fungus *Bipolaris cynodontis* DJWT-01**

Yan Shu,<sup>a</sup> Shi-Yu Feng,<sup>a</sup> Sheng-Qi Zhang,<sup>a</sup> Xun Tian,<sup>a</sup> Yun-Li Zhao,<sup>a</sup> Hua-Juan Yang,<sup>a</sup> Jia-Xin Wang,<sup>a</sup> Gui-Ling He,<sup>b</sup> Hao Zhou,<sup>a</sup> Jia-Peng Wang,<sup>\*a,b</sup> Le Cai,<sup>\*a</sup> and Zhong-Tao Ding<sup>\*c</sup>

<sup>a</sup> Key Laboratory of Medicinal Chemistry for Natural Resource, Ministry of Education, Yunnan Characteristic Plant Extraction Laboratory, Functional Molecules Analysis and Biotransformation Key Laboratory of Universities in Yunnan Province, School of Chemical Science and Technology, Yunnan University, Kunming, 650091, Yunnan, People's Republic of China.

<sup>b</sup> Yunnan Provincial Key Laboratory of Entomological Biopharmaceutical R&D, College of Pharmacy, Dali University, Dali, 671000, Yunnan, People's Republic of China.

<sup>c</sup> College of Traditional Chinese Medicine, Yunnan University of Chinese Medicine. Kunming, 650091, Yunnan, People's Republic of China.

\* Jia-Peng Wang [jpwang@dali.edu.cn](mailto:jpwang@dali.edu.cn); Le Cai [caile@ynu.edu.cn](mailto:caile@ynu.edu.cn); Zhong-Tao Ding [ztding@ynu.edu.cn](mailto:ztding@ynu.edu.cn)

## Table of Contents

|                                                                                            |    |
|--------------------------------------------------------------------------------------------|----|
| Table 1 $^1\text{H}$ NMR data of compounds 1-5.....                                        | 5  |
| Table 2 $^1\text{H}$ NMR data of compounds 6-10.....                                       | 6  |
| Table 3 $^{13}\text{C}$ NMR data of compounds 1-10.....                                    | 7  |
| Fig. S1. $^1\text{H}$ NMR spectrum ( $\text{CDCl}_3$ , 400 MHz) of 1.....                  | 8  |
| Fig. S2. $^{13}\text{C}$ and DEPT spectra ( $\text{CDCl}_3$ , 100 MHz) of 1.....           | 9  |
| Fig. S3. $^1\text{H}$ - $^1\text{H}$ COSY spectrum ( $\text{CDCl}_3$ , 400 MHz) of 1.....  | 10 |
| Fig. S4. HMBC spectrum ( $\text{CDCl}_3$ , 400 MHz) of 1.....                              | 11 |
| Fig. S5. HSQC spectrum ( $\text{CDCl}_3$ , 400 MHz) of 1.....                              | 12 |
| Fig. S6. NOESY spectrum ( $\text{CDCl}_3$ , 400 MHz) of 1.....                             | 13 |
| Fig. S7. (+)-HR-ESI-MS (positive mode) of 1.....                                           | 14 |
| Fig. S8. $^1\text{H}$ NMR spectrum (MeOD, 600 MHz) of 2.....                               | 15 |
| Fig. S9. $^{13}\text{C}$ and DEPT spectra (MeOD, 150 MHz) of 2.....                        | 16 |
| Fig. S10. $^1\text{H}$ - $^1\text{H}$ COSY spectrum (MeOD, 600 MHz) of 2.....              | 17 |
| Fig. S11. HMBC spectrum (MeOD, 600 MHz) of 2.....                                          | 18 |
| Fig. S12. HSQC spectrum (MeOD, 600 MHz) of 2.....                                          | 19 |
| Fig. S13. NOESY spectrum (MeOD, 600 MHz) of 2.....                                         | 20 |
| Fig. S14. (+)-HR-ESI-MS (positive mode) of 2.....                                          | 21 |
| Fig. S15. $^1\text{H}$ NMR spectrum ( $\text{CDCl}_3$ , 600 MHz) of 3.....                 | 22 |
| Fig. S16. $^{13}\text{C}$ and DEPT spectra ( $\text{CDCl}_3$ , 150 MHz) of 3.....          | 23 |
| Fig. S17. $^1\text{H}$ - $^1\text{H}$ COSY spectrum ( $\text{CDCl}_3$ , 600 MHz) of 3..... | 24 |
| Fig. S18. HMBC spectrum ( $\text{CDCl}_3$ , 600 MHz) of 3.....                             | 25 |
| Fig. S19. HSQC spectrum ( $\text{CDCl}_3$ , 600 MHz) of 3.....                             | 26 |
| Fig. S20. NOESY spectrum ( $\text{CDCl}_3$ , 600 MHz) of 3.....                            | 27 |
| Fig. S21. (+)-HR-ESI-MS (positive mode) of 3.....                                          | 28 |
| Fig. S22. $^1\text{H}$ NMR spectrum ( $\text{CDCl}_3$ , 400 MHz) of 4.....                 | 29 |
| Fig. S23. $^{13}\text{C}$ and DEPT spectra ( $\text{CDCl}_3$ , 100 MHz) of 4.....          | 30 |
| Fig. S24. $^1\text{H}$ - $^1\text{H}$ COSY spectrum ( $\text{CDCl}_3$ , 400 MHz) of 4..... | 31 |
| Fig. S25. HMBC spectrum ( $\text{CDCl}_3$ , 400 MHz) of 4.....                             | 32 |
| Fig. S26. HSQC spectrum ( $\text{CDCl}_3$ , 400 MHz) of 4.....                             | 33 |
| Fig. S27. NOESY spectrum ( $\text{CDCl}_3$ , 400 MHz) of 4.....                            | 34 |

|                                                                                                |    |
|------------------------------------------------------------------------------------------------|----|
| Fig. S28. (+)-HR-ESI-MS (positive mode) of 4.....                                              | 35 |
| Fig. S29. <sup>1</sup> H NMR spectrum (CDCl <sub>3</sub> , 400 MHz) of 5.....                  | 36 |
| Fig. S30. <sup>13</sup> C and DEPT spectra (CDCl <sub>3</sub> , 100 MHz) of 5.....             | 37 |
| Fig. S31. <sup>1</sup> H- <sup>1</sup> H COSY spectrum (CDCl <sub>3</sub> , 400 MHz) of 5..... | 38 |
| Fig. S32. HMBC spectrum (CDCl <sub>3</sub> , 400 MHz) of 5.....                                | 39 |
| Fig. S33. HSQC spectrum (CDCl <sub>3</sub> , 400 MHz) of 5.....                                | 40 |
| Fig. S34. NOESY spectrum (CDCl <sub>3</sub> , 400 MHz) of 5.....                               | 41 |
| Fig. S35. (+)-HR-ESI-MS (positive mode) of 5.....                                              | 42 |
| Fig. S36. <sup>1</sup> H NMR spectrum (CDCl <sub>3</sub> , 400 MHz) of 6.....                  | 43 |
| Fig. S37. <sup>13</sup> C and DEPT spectra (CDCl <sub>3</sub> , 150 MHz) of 6.....             | 44 |
| Fig. S38. <sup>1</sup> H- <sup>1</sup> H COSY spectrum (CDCl <sub>3</sub> , 400 MHz) of 6..... | 45 |
| Fig. S39. HMBC spectrum (CDCl <sub>3</sub> , 400 MHz) of 6.....                                | 46 |
| Fig. S40. HSQC spectrum (CDCl <sub>3</sub> , 400 MHz) of 6.....                                | 47 |
| Fig. S41. NOESY spectrum (CDCl <sub>3</sub> , 400 MHz) of 6.....                               | 48 |
| Fig. S42. (+)-HR-ESI-MS (positive mode) of 6.....                                              | 49 |
| Fig. S43. <sup>1</sup> H NMR spectrum (CDCl <sub>3</sub> , 600 MHz) of 7.....                  | 50 |
| Fig. S44. <sup>13</sup> C and DEPT spectra (CDCl <sub>3</sub> , 150 MHz) of 7.....             | 51 |
| Fig. S45. <sup>1</sup> H- <sup>1</sup> H COSY spectrum (CDCl <sub>3</sub> , 600 MHz) of 7..... | 52 |
| Fig. S46. HMBC spectrum (CDCl <sub>3</sub> , 600 MHz) of 7.....                                | 53 |
| Fig. S47. HSQC spectrum (CDCl <sub>3</sub> , 600 MHz) of 7.....                                | 54 |
| Fig. S48. ROESY spectrum (CDCl <sub>3</sub> , 600 MHz) of 7.....                               | 55 |
| Fig. S49. (+)-HR-ESI-MS (positive mode) of 7.....                                              | 56 |
| Fig. S50. <sup>1</sup> H NMR spectrum (CDCl <sub>3</sub> , 600 MHz) of 8.....                  | 57 |
| Fig. S51. <sup>13</sup> C and DEPT spectra (CDCl <sub>3</sub> , 150 MHz) of 8.....             | 58 |
| Fig. S52. <sup>1</sup> H- <sup>1</sup> H COSY spectrum (CDCl <sub>3</sub> , 600 MHz) of 8..... | 59 |
| Fig. S53. HMBC spectrum (CDCl <sub>3</sub> , 600 MHz) of 8.....                                | 60 |
| Fig. S54. HSQC spectrum (CDCl <sub>3</sub> , 600 MHz) of 8.....                                | 61 |
| Fig. S55. NOESY spectrum (CDCl <sub>3</sub> , 600 MHz) of 8.....                               | 62 |
| Fig. S56. (+)-HR-ESI-MS (positive mode) of 8.....                                              | 63 |
| Fig. S57. <sup>1</sup> H NMR spectrum (CDCl <sub>3</sub> , 600 MHz) of 9.....                  | 64 |
| Fig. S58. <sup>13</sup> C and DEPT spectra (CDCl <sub>3</sub> , 150 MHz) of 9.....             | 65 |
| Fig. S59. <sup>1</sup> H- <sup>1</sup> H COSY spectrum (CDCl <sub>3</sub> , 600 MHz) of 9..... | 66 |

|                                                                                                 |    |
|-------------------------------------------------------------------------------------------------|----|
| Fig. S60. HMBC spectrum (CDCl <sub>3</sub> , 600 MHz) of 9 .....                                | 67 |
| Fig. S61. HSQC spectrum (CDCl <sub>3</sub> , 600 MHz) of 9 .....                                | 68 |
| Fig. S62. NOESY spectrum (CDCl <sub>3</sub> , 600 MHz) of 9.....                                | 69 |
| Fig. S63. (+)-HR-ESI-MS (positive mode) of 9.....                                               | 70 |
| Fig. S64. <sup>1</sup> H NMR spectrum (CDCl <sub>3</sub> , 600 MHz) of 10.....                  | 71 |
| Fig. S65. <sup>13</sup> C and DEPT spectra (CDCl <sub>3</sub> , 150 MHz) of 10.....             | 72 |
| Fig. S66. <sup>1</sup> H- <sup>1</sup> H COSY spectrum (CDCl <sub>3</sub> , 600 MHz) of 10..... | 73 |
| Fig. S67. HMBC spectrum (CDCl <sub>3</sub> , 600 MHz) of 10 .....                               | 74 |
| Fig. S68. HSQC spectrum (CDCl <sub>3</sub> , 600 MHz) of 10 .....                               | 75 |
| Fig. S69. NOESY spectrum (CDCl <sub>3</sub> , 600 MHz) of 10.....                               | 76 |
| Fig. S70. (+)-HR-ESI-MS (positive mode) of 10.....                                              | 77 |
| Fig. S71. <sup>1</sup> H NMR spectrum of <i>S</i> -MTPA ester of 1 .....                        | 78 |
| Fig. S72. <sup>1</sup> H NMR spectrum of <i>R</i> -MTPA ester of 1.....                         | 79 |
| Fig. S73. DP4+ analysis of 3a (Isomer 1) and 3b (Isomer 2). .....                               | 80 |
| Fig. 74. View of the pack drawing of bipodonine A (1). .....                                    | 81 |

**Table 1**  $^1\text{H}$  NMR data of compounds 1-5.

| No. | 1 <sup>a</sup>      | 2 <sup>c</sup>      | 3 <sup>b</sup>                | 4 <sup>a</sup>               | 5 <sup>a</sup>                     |
|-----|---------------------|---------------------|-------------------------------|------------------------------|------------------------------------|
| 1   | 4.52 d (12.6)       | 4.12 dd (11.6, 7.9) | 2.14 overlap<br>2.03 overlap  | 1.82 overlap<br>1.20 overlap | 1.76 dd (6.9, 1.2)<br>1.10 overlap |
| 2   | 1.86 d (11.8)       | 1.74 overlap        | 6.74 s                        | 4.32 br s                    | 4.14 m                             |
| 4   | 1.46 m<br>1.92 m    | 1.76 m<br>1.87 m    |                               | 2.49 dt (12.5, 3.9)          | 2.43 m                             |
| 5   | 1.60 m<br>1.89 m    | 1.55 m<br>1.71 m    | 1.98 m<br>2.63 dd (16.9, 6.8) | 1.86 m<br>1.93 m             | 1.50 m<br>1.96 dt (12.7, 4.1)      |
| 6   | 3.17 dd (12.0, 4.0) | 3.18 dd (12.0, 3.8) | 3.32 dd (10.7, 5.9)           | 3.13 dd (11.5, 3.9)          | 3.20 overlap                       |
| 8   | 1.78 m<br>2.03 m    | 1.41 m<br>2.67 m    | 1.35 m<br>1.72 m              | 1.22 m<br>1.58 m             | 1.31 m<br>1.60 m                   |
| 9   | 1.45 m<br>1.70 m    | 1.47 m<br>1.68 m    | 1.49 m<br>1.62 m              | 1.40 m<br>1.67 m             | 1.47 m<br>1.60 m                   |
| 10  | 3.29 dd (12.0, 3.2) | 3.25 dd (11.8, 2.7) | 3.20 dd (8.0, 1.6)            | 3.21 dd (11.9, 2.9)          | 3.23 overlap                       |
| 12  | 1.18 s 3H           | 1.17 s 3H           | 1.18 s 3H                     | 1.18 s 3H                    | 1.16 s 3H                          |
| 13  | 1.17 s 3H           | 1.16 s 3H           | 1.17 s 3H                     | 1.18 s 3H                    | 1.14 s 3H                          |
| 14  | 1.02 s 3H           | 1.06 s 3H           | 0.85 s 3H                     | 1.15 s 3H                    | 0.91 s 3H                          |
| 15  | 1.43 s 3H           | 1.45 s 3H           | 2.30 s 3H                     | 2.21 s 3H                    | 2.19 s 3H                          |
| 16  |                     | 3.94 d (7.9)        |                               |                              |                                    |

<sup>a</sup> Recorded at 400 MHz, ( $\delta$ ,  $\text{CDCl}_3$ ,  $J$  in Hz); <sup>b</sup> Recorded at 600 MHz, ( $\delta$ ,  $\text{CDCl}_3$ ,  $J$  in Hz); <sup>c</sup> Recorded at 600 MHz, ( $\delta$ ,  $\text{CD}_3\text{OD}$ ,  $J$  in Hz).

**Table 2** <sup>1</sup>H NMR data of compounds **6-10**.

| No. | <b>6</b> <sup>a</sup> | <b>7</b> <sup>b</sup> | <b>8</b> <sup>b</sup> | <b>9</b> <sup>b</sup> | <b>10</b> <sup>b</sup> |
|-----|-----------------------|-----------------------|-----------------------|-----------------------|------------------------|
| 1   |                       | 10.01 d               |                       | 2.30 overlap 2H       | 0.84 s 3H              |
| 2   |                       | 2.07 s                |                       |                       |                        |
| 4   | 2.21 m                | 1.41 m                | 2.50 m                | 2.56 m 2H             | 2.47 m                 |
|     | 2.25 m                | 1.75 dt (14.3, 3.1)   | 2.63 m                |                       | 2.59 m                 |
| 5   | 1.73 t (6.3) 2H       | 1.45 m                | 1.69 m 2H             | 1.59 m                | 1.55 m                 |
|     |                       | 1.66 m                |                       | 1.85 m                | 1.81 m                 |
| 6   | 3.29 dd (10.6, 2.7)   | 3.16 dd (11.9, 3.5)   | 3.65 dd (9.0, 3.6)    | 3.23 d (10.5)         | 2.98 dd (10.9, 1.9)    |
| 8   | 1.46 m                | 1.57 dd (12.6, 3.9)   | 1.86 dt (13.1, 3.2)   | 1.72 m 2H             | 1.35 m                 |
|     | 1.95 d (11.6)         | 1.91 m                | 1.98 m                |                       | 1.50 m                 |
| 9   | 1.49 m                | 1.50 m                | 1.52 m 2H             | 1.47 m                | 1.40 m                 |
|     | 1.62 m                | 1.84 m                |                       | 1.57 m                | 1.51 m                 |
| 10  | 3.22 dd (11.6, 2.5)   | 3.25 dd (11.7, 2.8)   | 3.18 dd (11.0, 3.4)   | 3.09 dd (11.5, 2.2)   | 3.06 dd (11.0, 2.2)    |
| 12  | 1.19 s 3H             | 1.18 s 3H             | 1.16 s 3H             | 1.18 s 3H             | 1.17 s 3H              |
| 13  | 1.18 s 3H             | 1.17 s 3H             | 1.20 s 3H             | 1.14 s 3H             | 1.13 s 3H              |
| 14  | 1.20 s 3H             | 1.23 s 3H             | 1.19 s 3H             | 1.03 s 3H             | 0.87 s 3H              |
| 15  | 1.79 s 3H             | 1.21 s 3H             | 2.15 s 3H             | 2.15 s 3H             | 2.15 s 3H              |

<sup>a</sup> Recorded at 400 MHz, ( $\delta$ , CDCl<sub>3</sub>, *J* in Hz); <sup>b</sup> Recorded at 600 MHz, ( $\delta$ , CDCl<sub>3</sub>, *J* in Hz).

**Table 3** <sup>13</sup>C NMR data of compounds 1-10.

| No. | 1 <sup>a</sup> | 2 <sup>c</sup> | 3 <sup>b</sup> | 4 <sup>a</sup> | 5 <sup>a</sup> | 6 <sup>a</sup> | 7 <sup>b</sup> | 8 <sup>a</sup> | 9 <sup>a</sup> | 10 <sup>b</sup> |
|-----|----------------|----------------|----------------|----------------|----------------|----------------|----------------|----------------|----------------|-----------------|
| 1   | 68.7           | 72.8           | 40.6           | 43.5           | 44.6           | 173.8          | 207.2          | 181.0          | 44.5           | 27.2            |
| 2   | 59.3           | 54.2           | 138.5          | 66.7           | 66.5           | 133.6          | 64.8           |                | 176.4          |                 |
| 3   | 82.5           | 84.3           | 137.8          | 212.2          | 211.5          | 137.6          | 71.4           | 209.0          | 209.8          | 209.6           |
| 4   | 36.4           | 39.4           | 198.5          | 54.2           | 57.3           | 31.3           | 39.1           | 41.0           | 41.0           | 41.3            |
| 5   | 26.0           | 26.1           | 26.9           | 25.4           | 29.0           | 23.7           | 21.4           | 25.8           | 24.0           | 24.2            |
| 6   | 84.4           | 85.5           | 79.0           | 83.7           | 82.1           | 80.6           | 83.7           | 80.1           | 82.8           | 85.1            |
| 7   | 35.2           | 38.2           | 31.6           | 33.2           | 33.7           | 35.4           | 37.6           | 44.9           | 35.4           | 32.7            |
| 8   | 36.6           | 40.0           | 37.9           | 39.0           | 38.5           | 33.7           | 37.6           | 34.9           | 35.4           | 39.4            |
| 9   | 20.7           | 22.5           | 22.3           | 21.8           | 21.6           | 21.9           | 24.0           | 20.5           | 22.1           | 22.6            |
| 10  | 85.6           | 86.6           | 84.6           | 85.4           | 85.4           | 84.7           | 85.1           | 84.5           | 84.6           | 84.8            |
| 11  | 72.1           | 72.8           | 72.0           | 72.1           | 72.0           | 72.4           | 72.0           | 72.0           | 72.3           | 72.2            |
| 12  | 26.0           | 25.5           | 26.1           | 26.1           | 26.1           | 26.0           | 26.1           | 26.0           | 26.2           | 26.3            |
| 13  | 23.8           | 25.5           | 23.9           | 23.9           | 23.9           | 23.8           | 24.0           | 24.0           | 24.1           | 24.2            |
| 14  | 12.2           | 12.8           | 16.5           | 17.4           | 16.5           | 19.2           | 13.8           | 13.8           | 17.9           | 19.1            |
| 15  | 23.5           | 25.4           | 25.5           | 28.8           | 29.1           | 21.2           | 31.1           | 29.7           | 30.0           | 30.0            |
| 16  | 178.5          | 77.1           |                |                |                |                |                |                |                |                 |
| 17  |                | 175.4          |                |                |                |                |                |                |                |                 |

<sup>a</sup> Recorded at 100 MHz, ( $\delta$ , CDCl<sub>3</sub>); <sup>b</sup> Recorded at 150 MHz, ( $\delta$ , CDCl<sub>3</sub>); <sup>c</sup> Recorded at 150 MHz, ( $\delta$ , CD<sub>3</sub>OD).

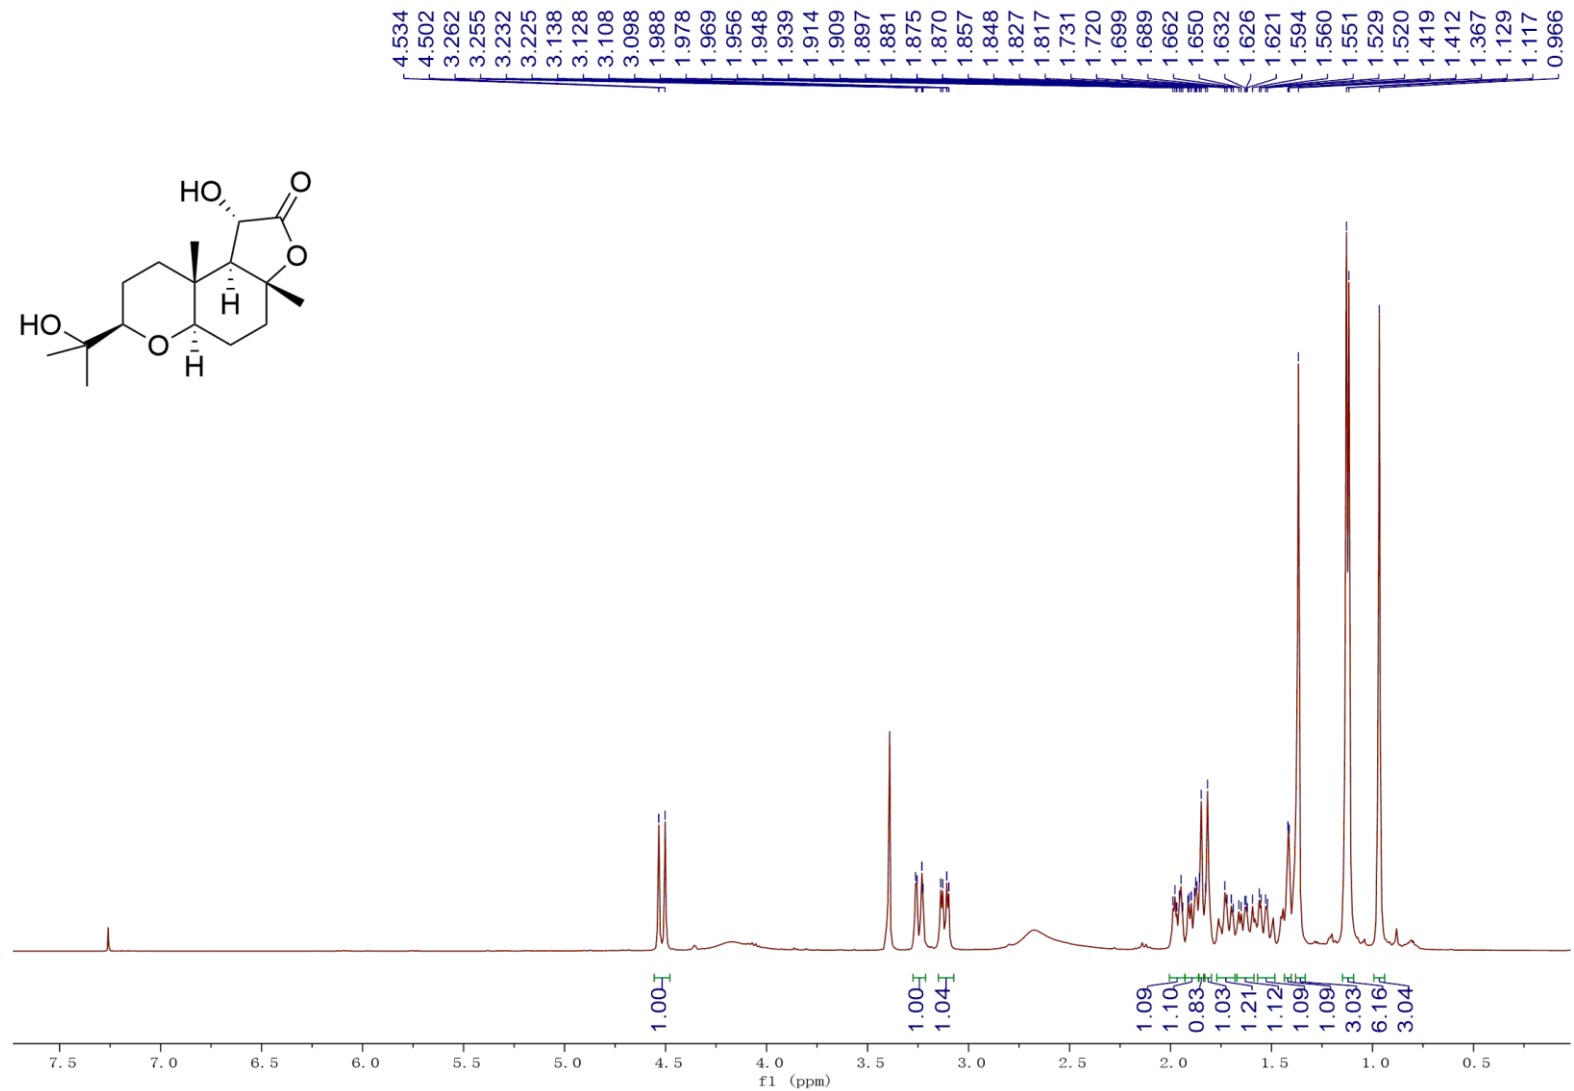

**Fig. S1.** <sup>1</sup>H NMR spectrum (CDCl<sub>3</sub>, 400 MHz) of **1**



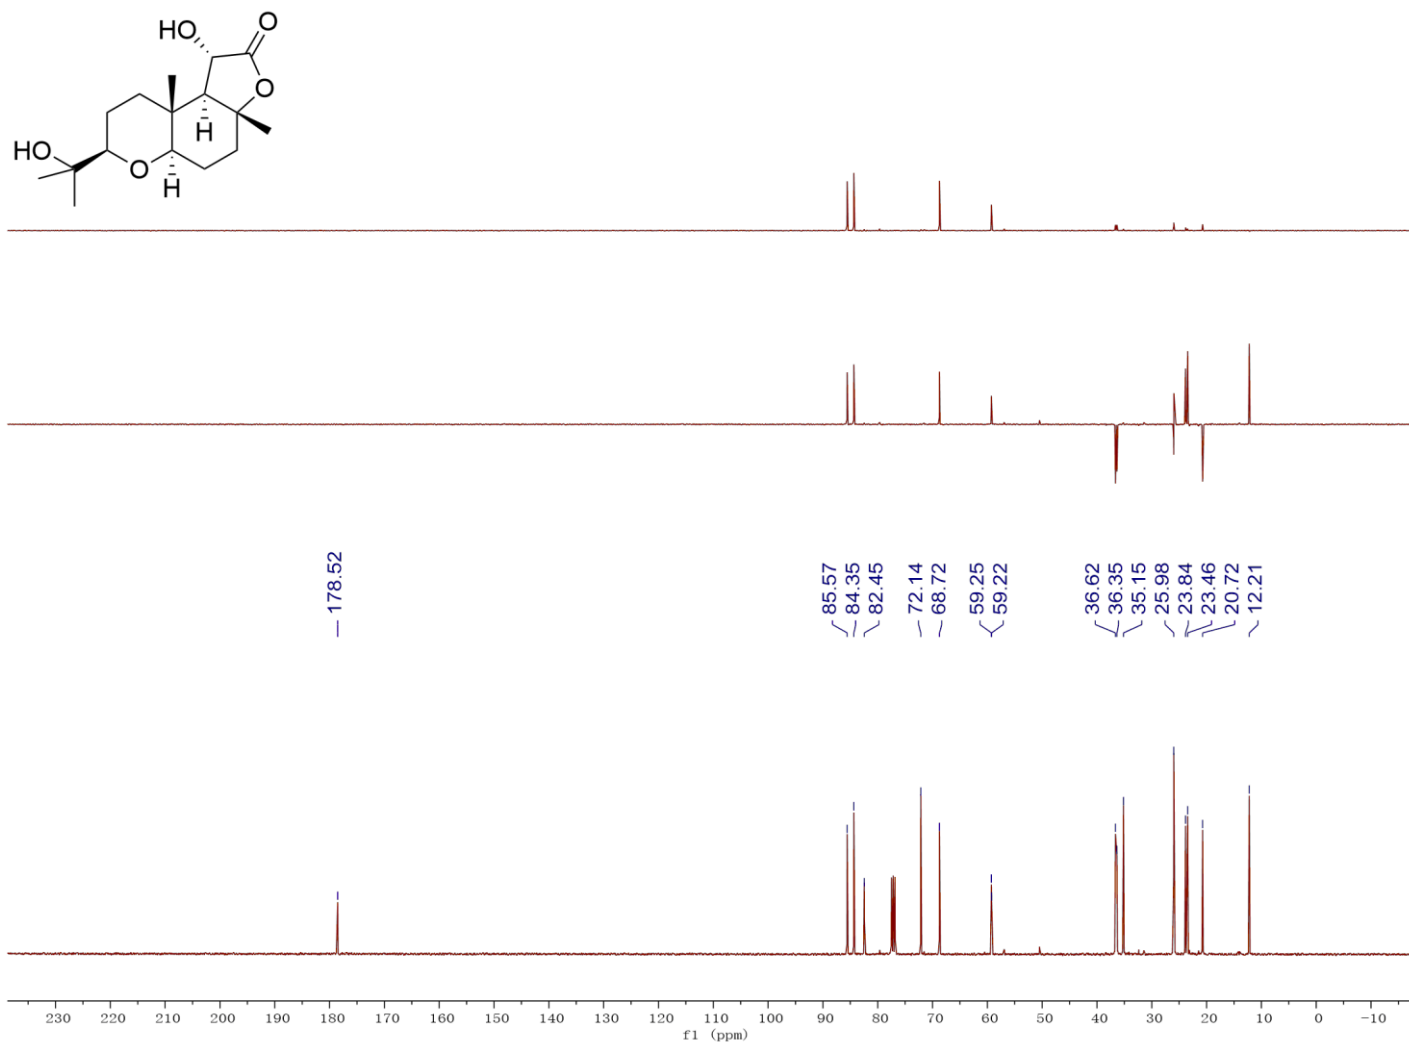

**Fig. S2.**  $^{13}\text{C}$  and DEPT spectra ( $\text{CDCl}_3$ , 100 MHz) of **1**

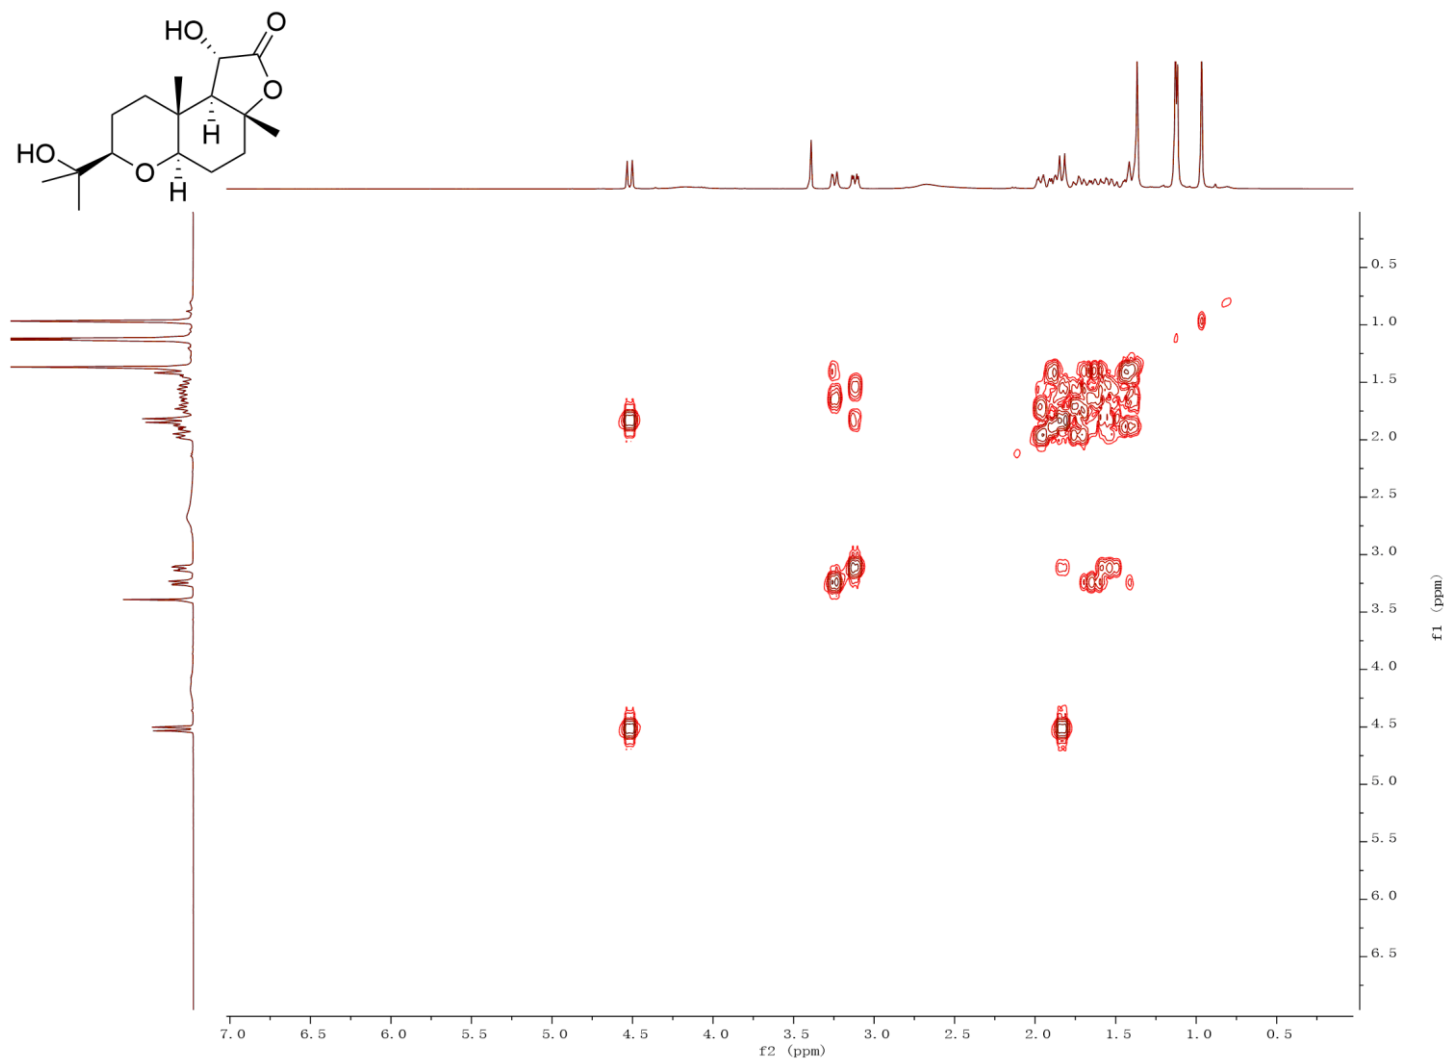

**Fig. S3.**  $^1\text{H}$ - $^1\text{H}$  COSY spectrum ( $\text{CDCl}_3$ , 400 MHz) of **1**

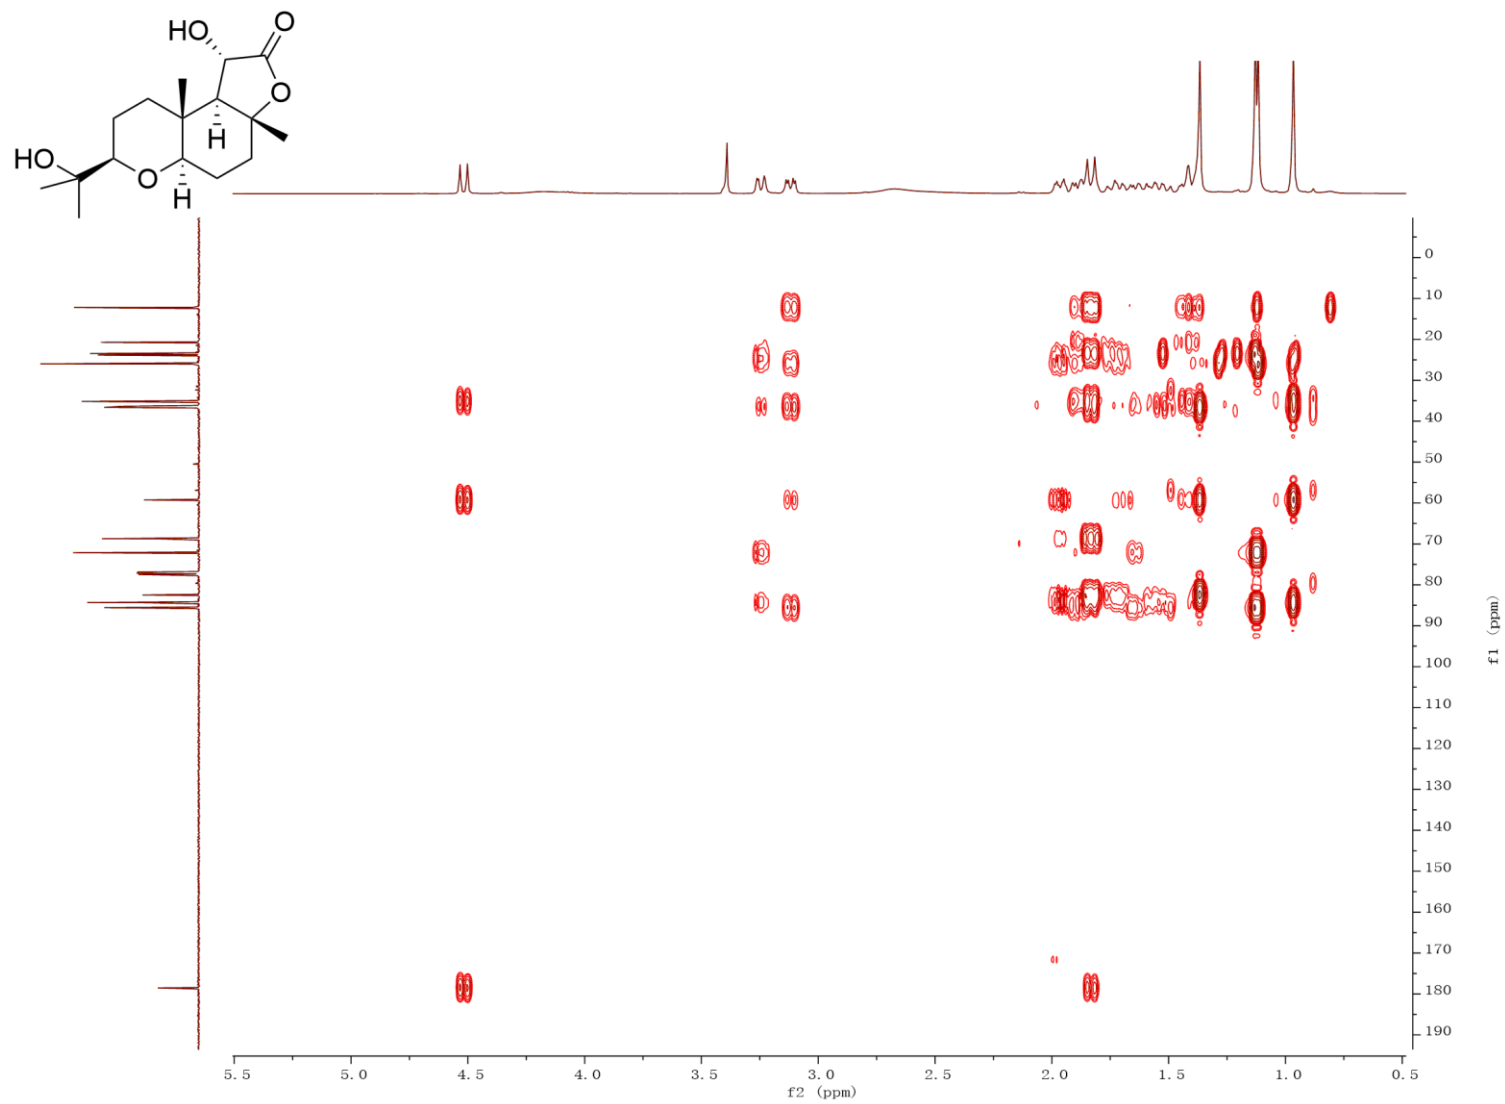

**Fig. S4.** HMBC spectrum (CDCl<sub>3</sub>, 400 MHz) of **1**

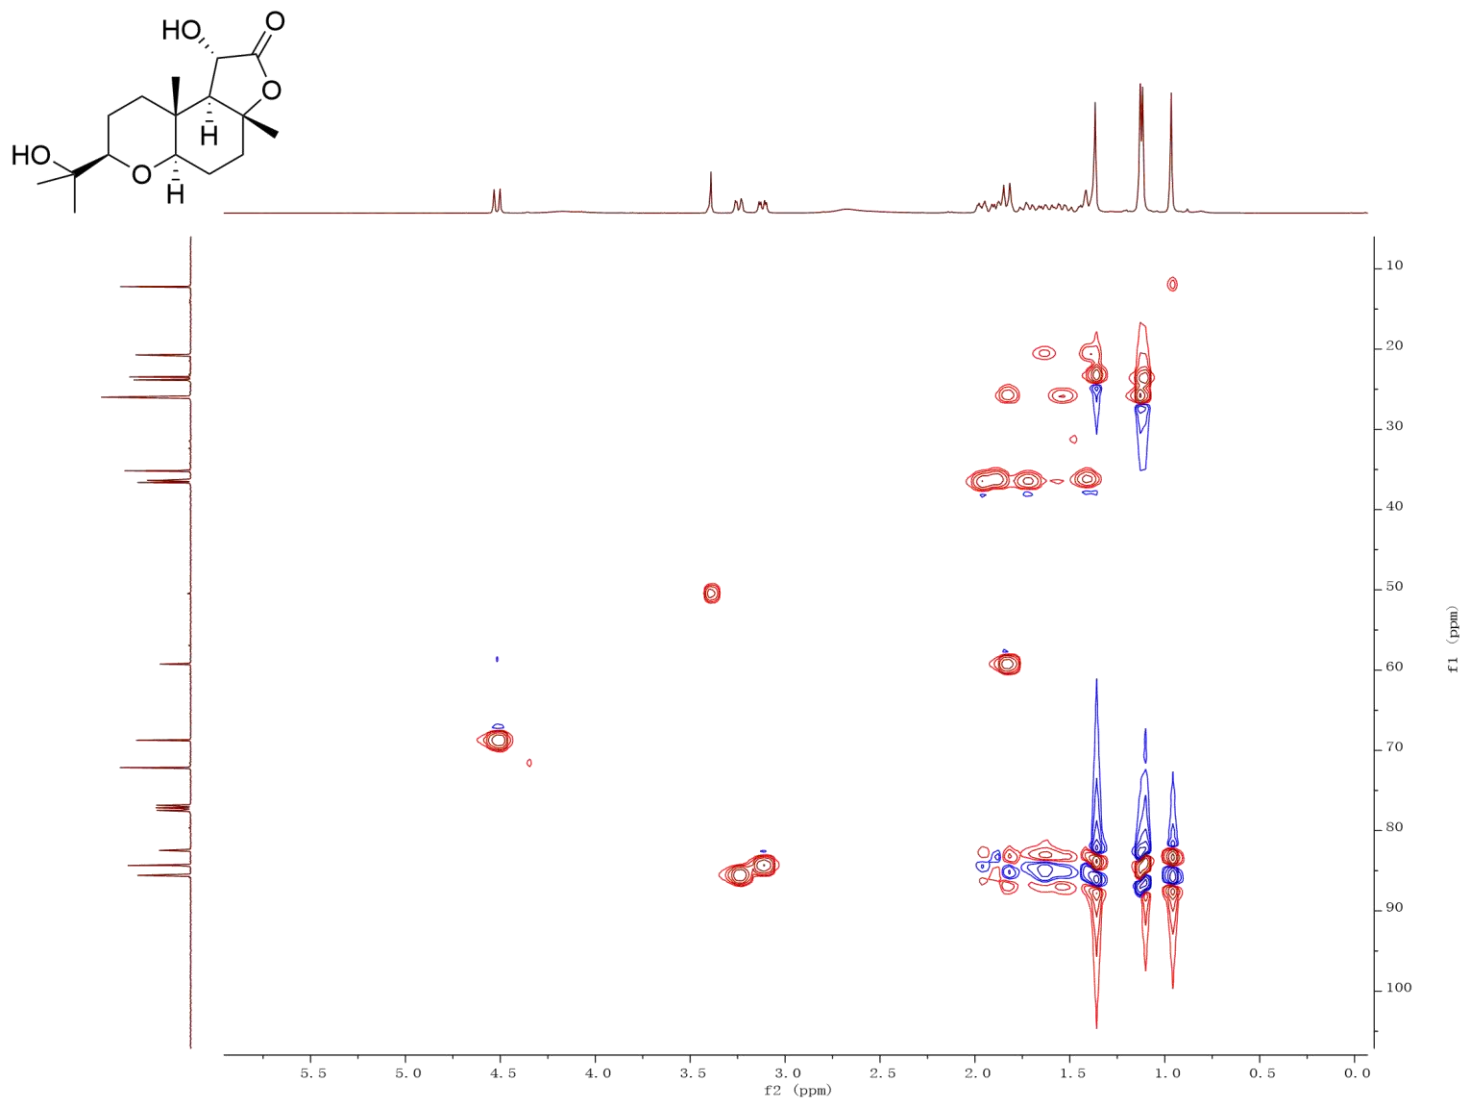

**Fig. S5.** HSQC spectrum (CDCl<sub>3</sub>, 400 MHz) of **1**

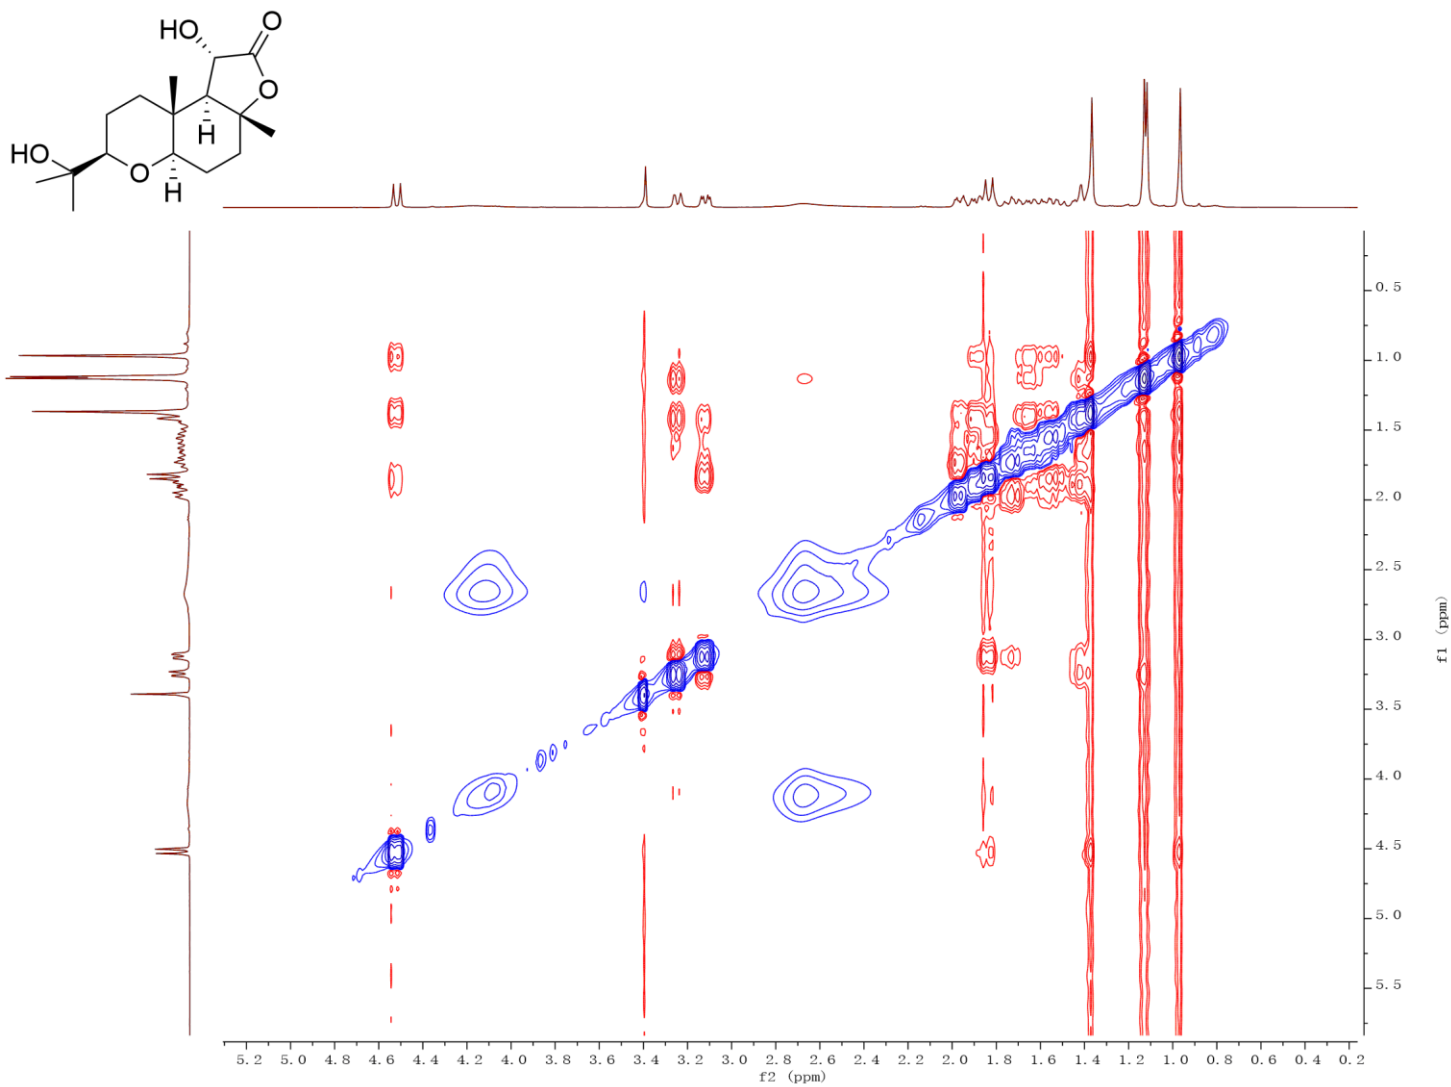

**Fig. S6.** NOESY spectrum (CDCl<sub>3</sub>, 400 MHz) of **1**

DJ1-VA-292 #47 RT: 0.96 AV: 1 NL: 4.42E7  
T: FTMS + c ESI Full ms [100.00-850.00]

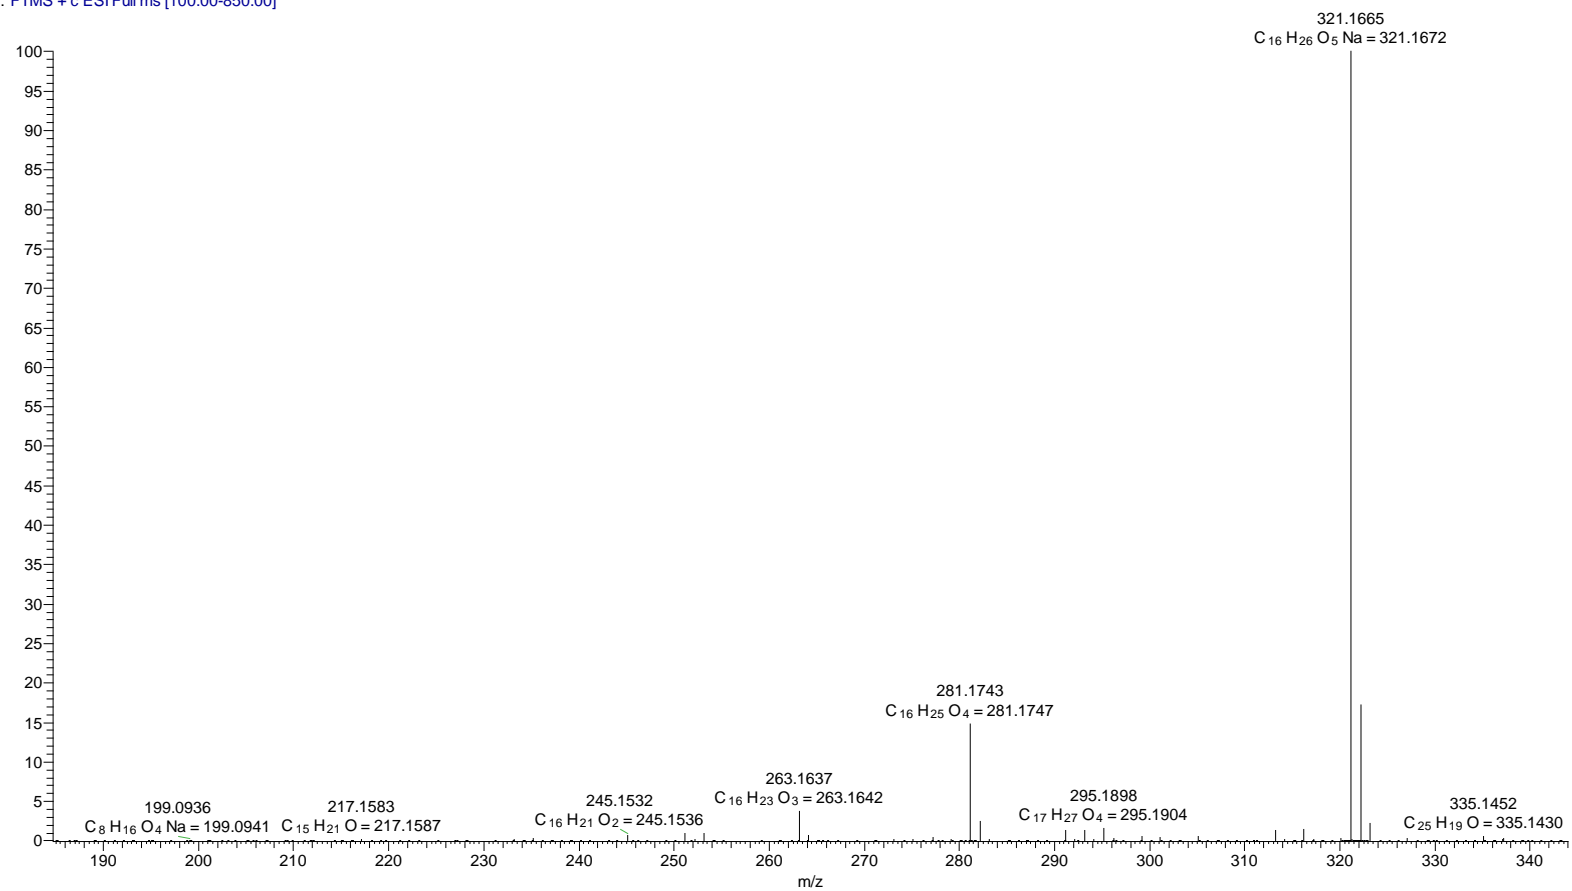

**Fig. S7.** (+)-HR-ESI-MS (positive mode) of **1**

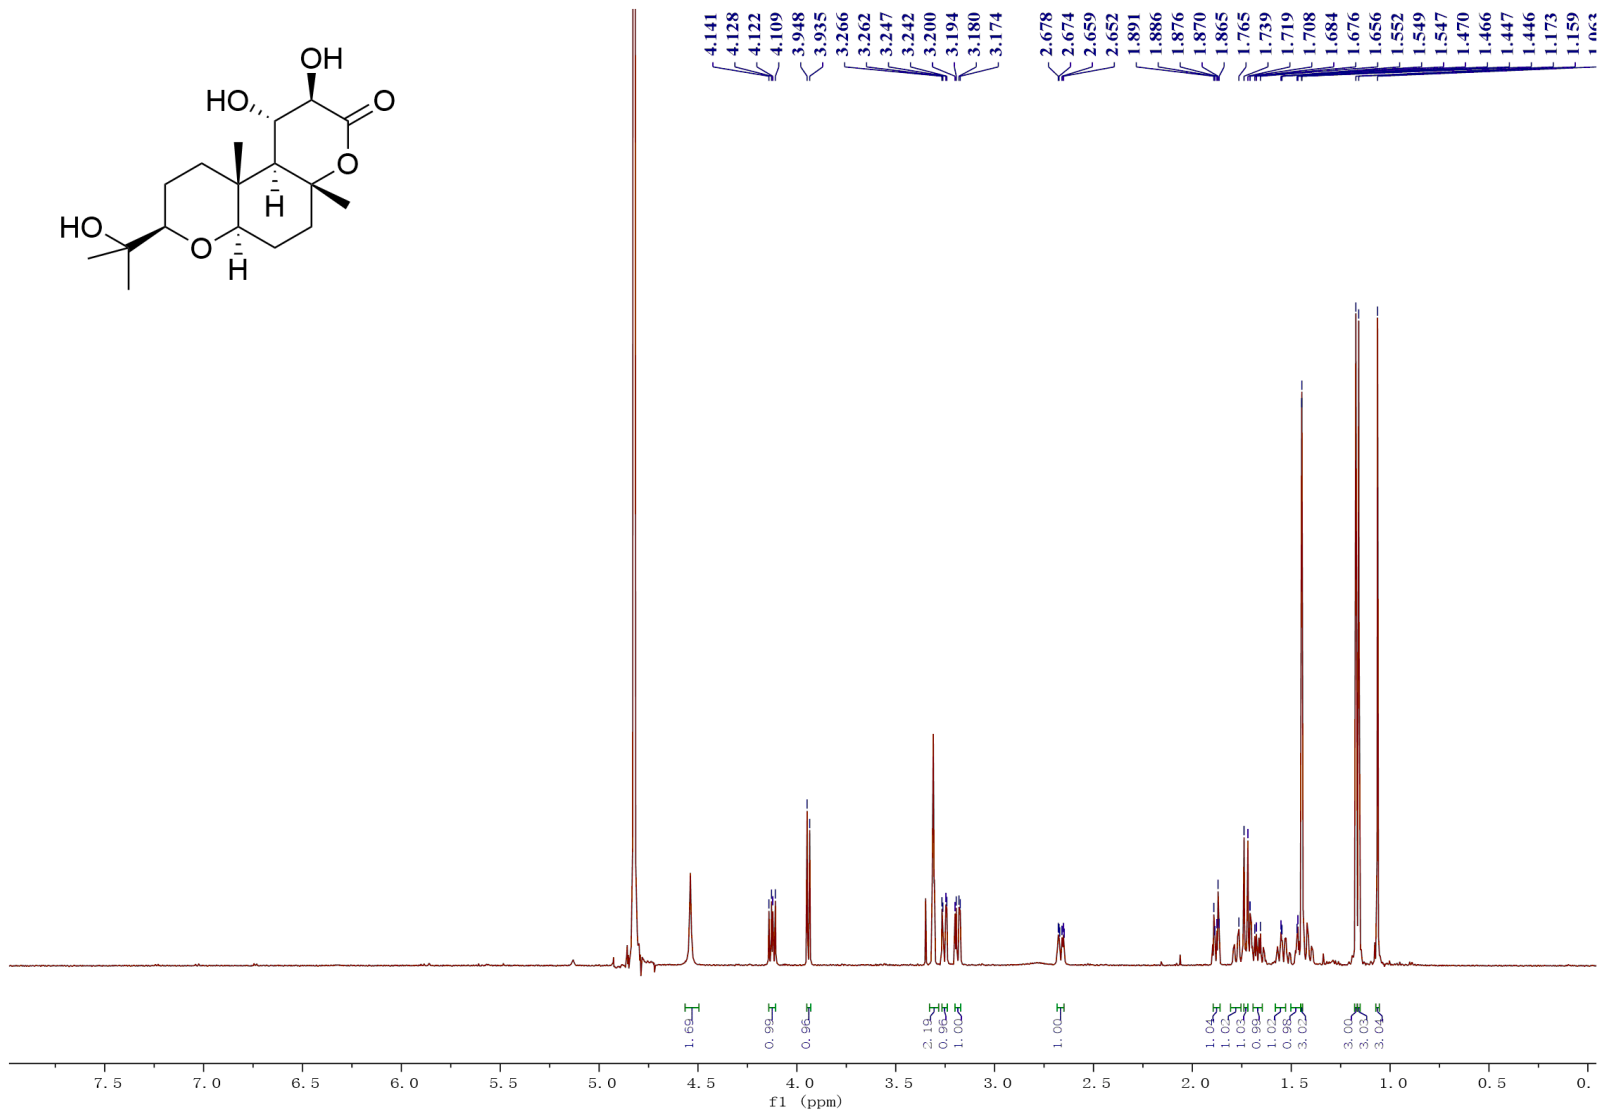

**Fig. S8.** <sup>1</sup>H NMR spectrum (MeOD, 600 MHz) of 2

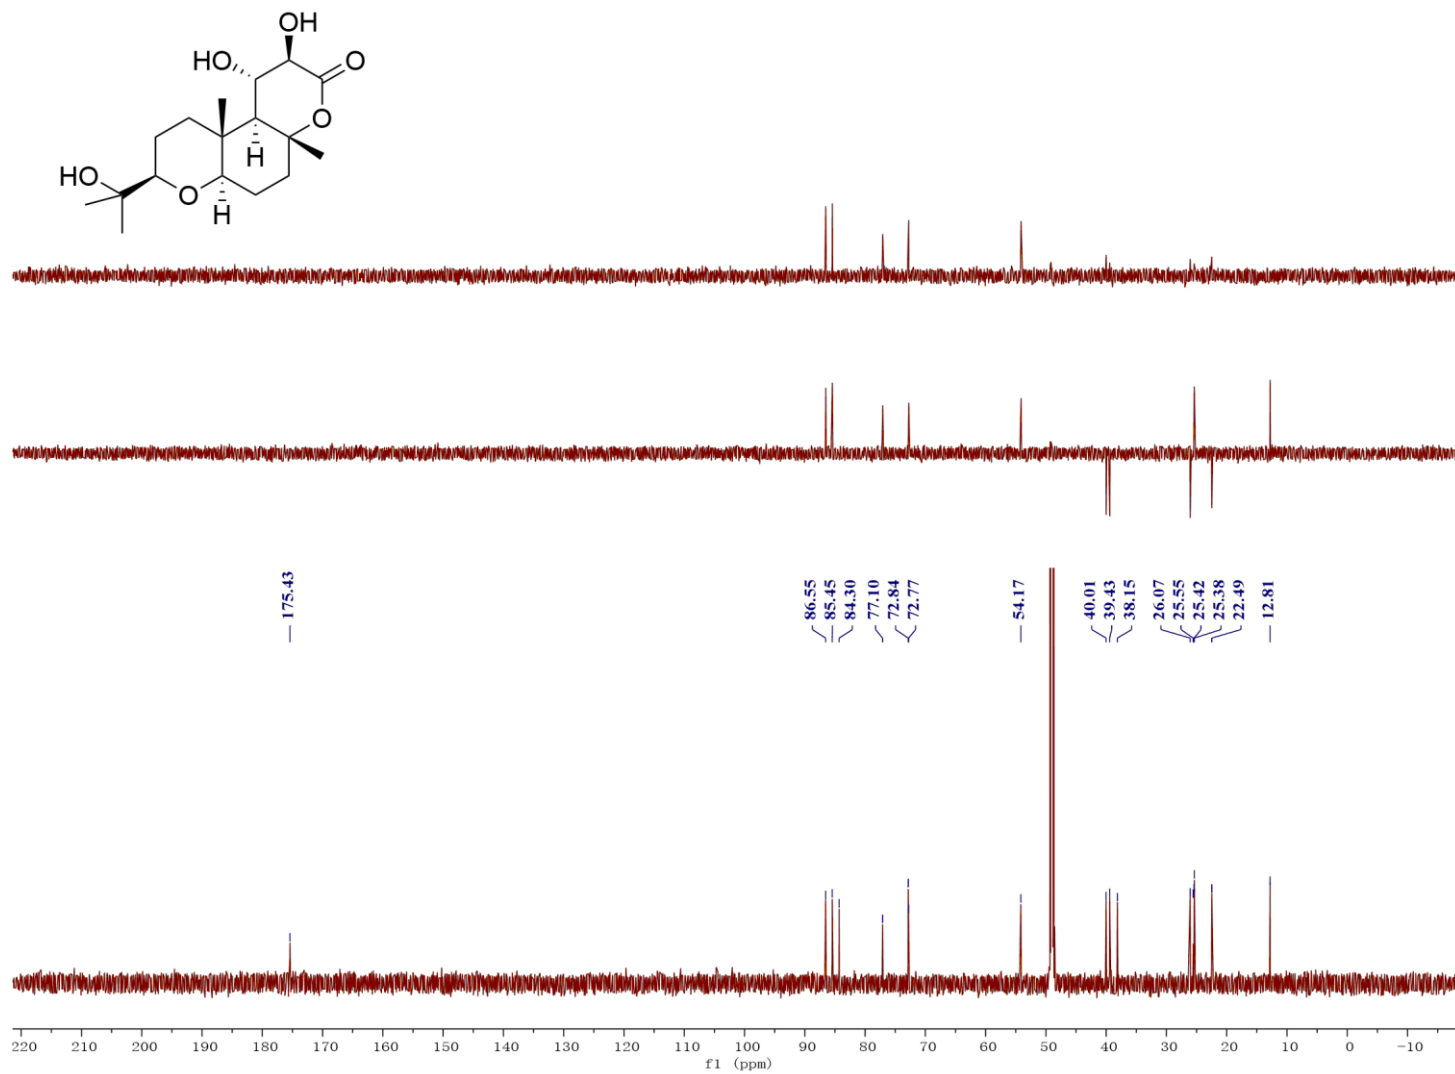

**Fig. S9.**  $^{13}\text{C}$  and DEPT spectra (MeOD, 150 MHz) of **2**



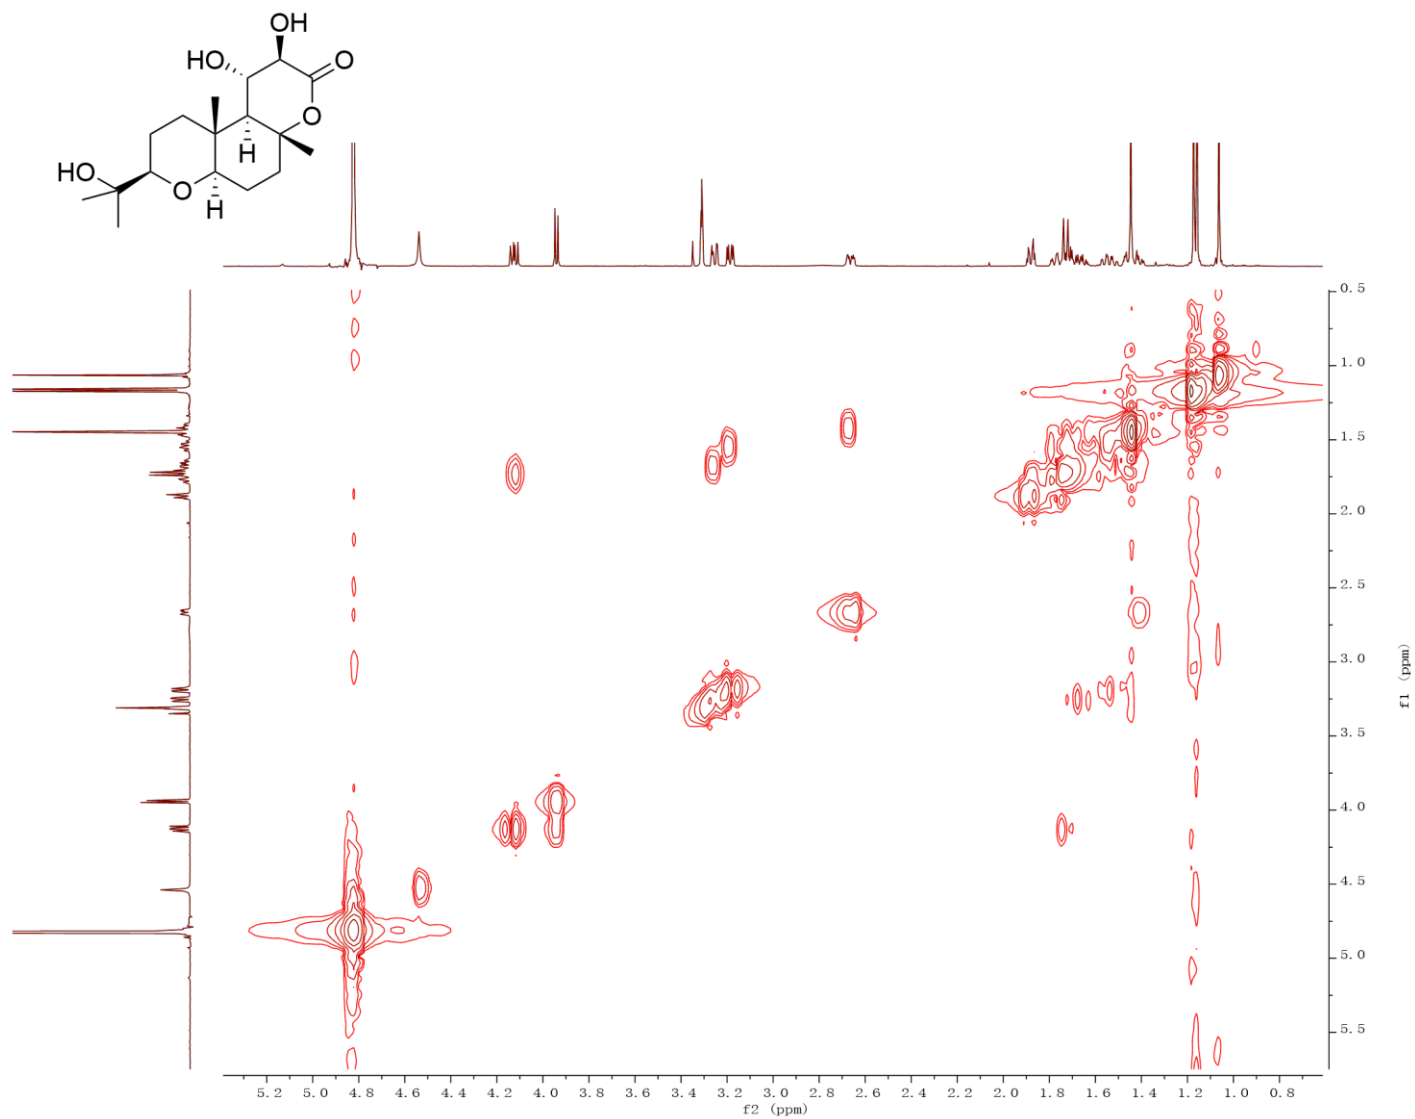

**Fig. S10.**  $^1\text{H}$ - $^1\text{H}$  COSY spectrum (MeOD, 600 MHz) of **2**

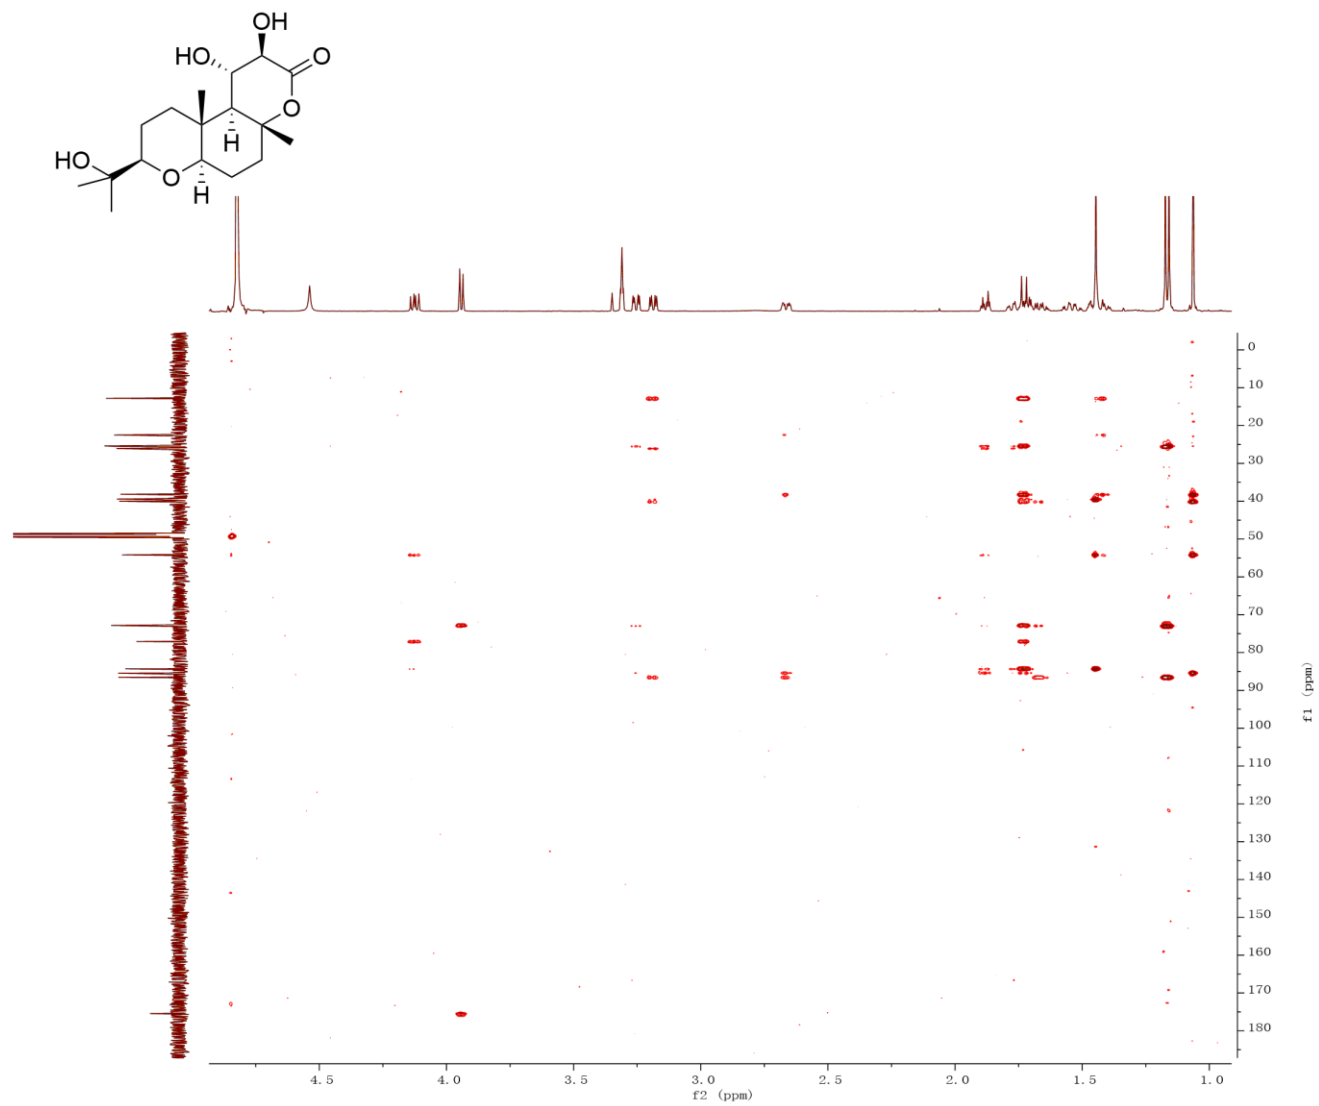

**Fig. S11.** HMBC spectrum (MeOD, 600 MHz) of **2**

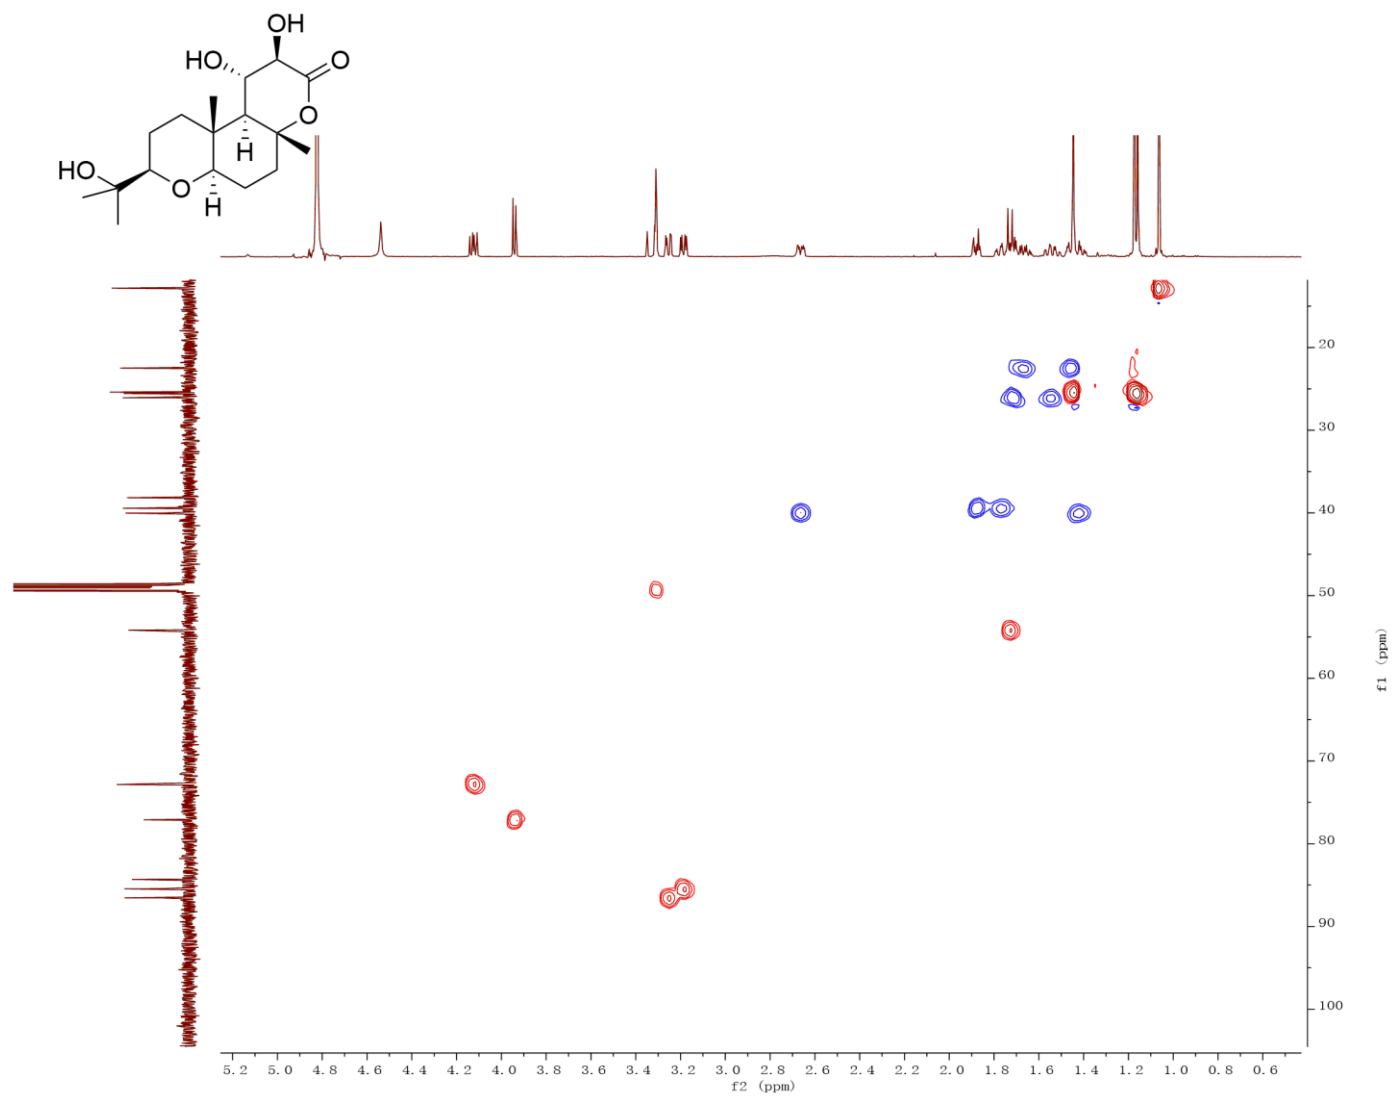

**Fig. S12.** HSQC spectrum (MeOD, 600 MHz) of **2**

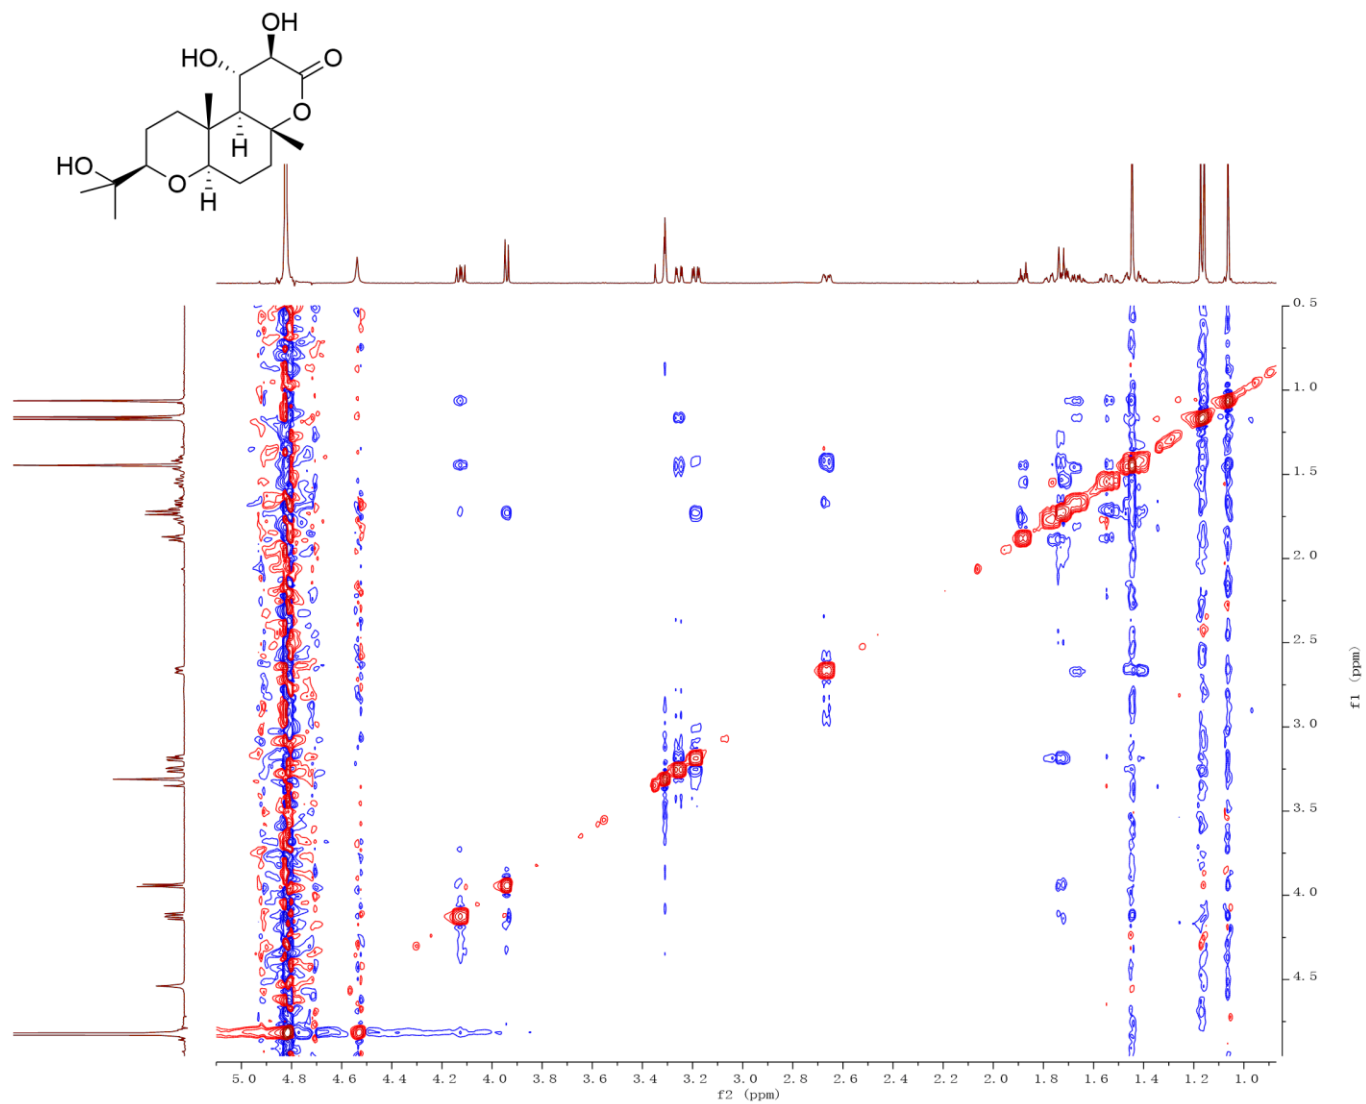

**Fig. S13.** NOESY spectrum (MeOD, 600 MHz) of **2**

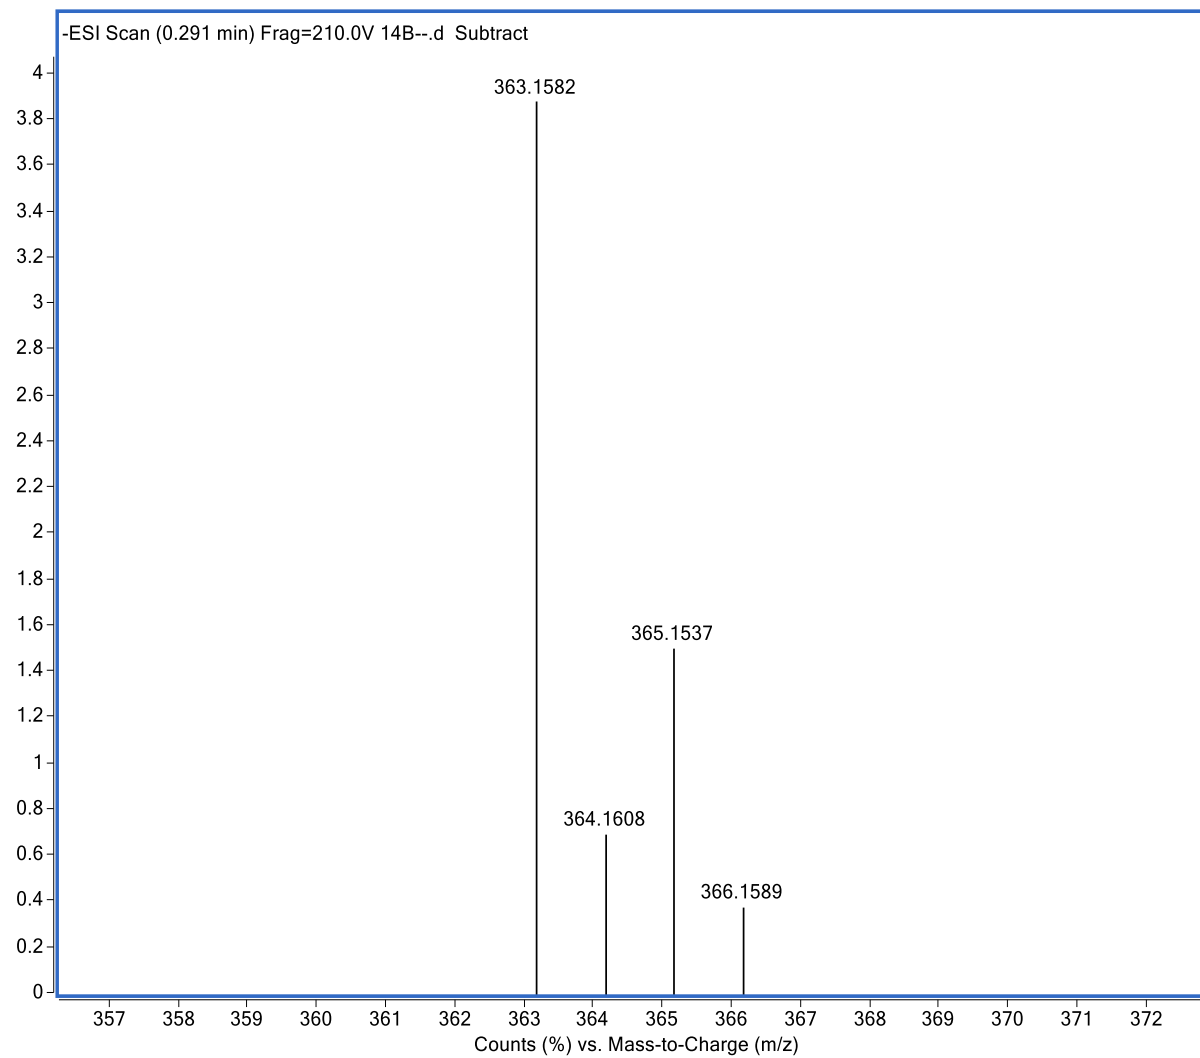

**Fig. S14.** (+)-HR-ESI-MS (positive mode) of **2**.

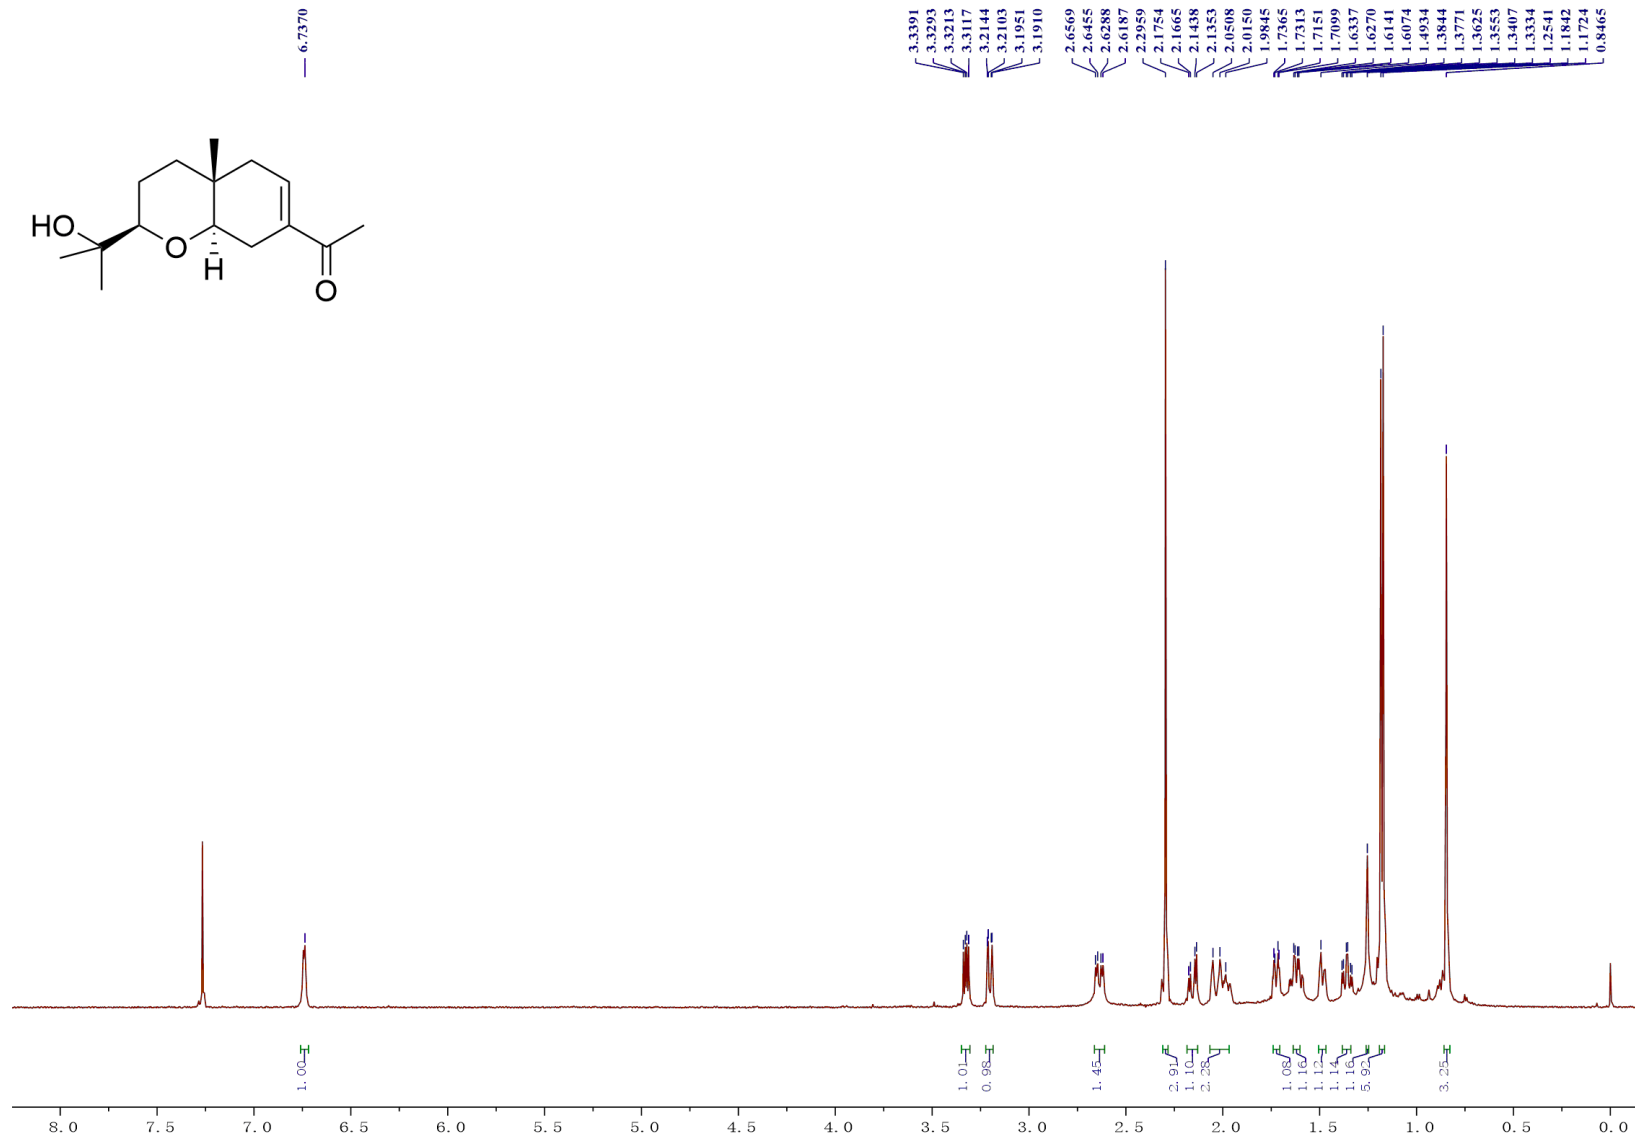

Fig. S15. <sup>1</sup>H NMR spectrum (CDCl<sub>3</sub>, 600 MHz) of 3

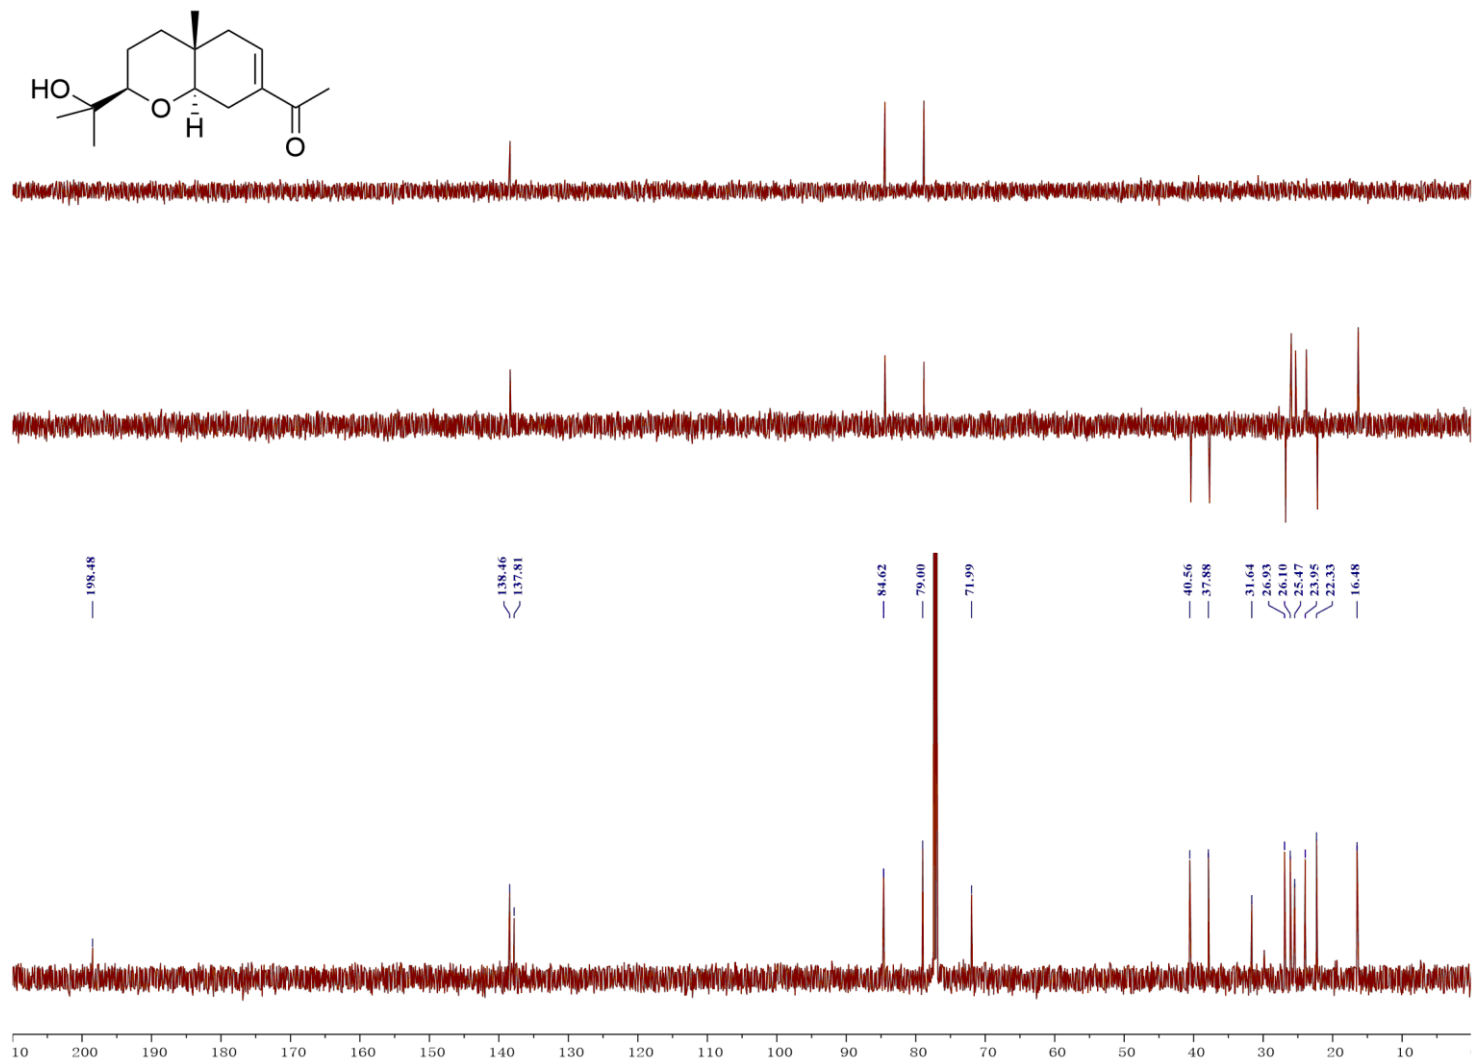

Fig. S16. <sup>13</sup>C and DEPT spectra (CDCl<sub>3</sub>, 150 MHz) of **3**

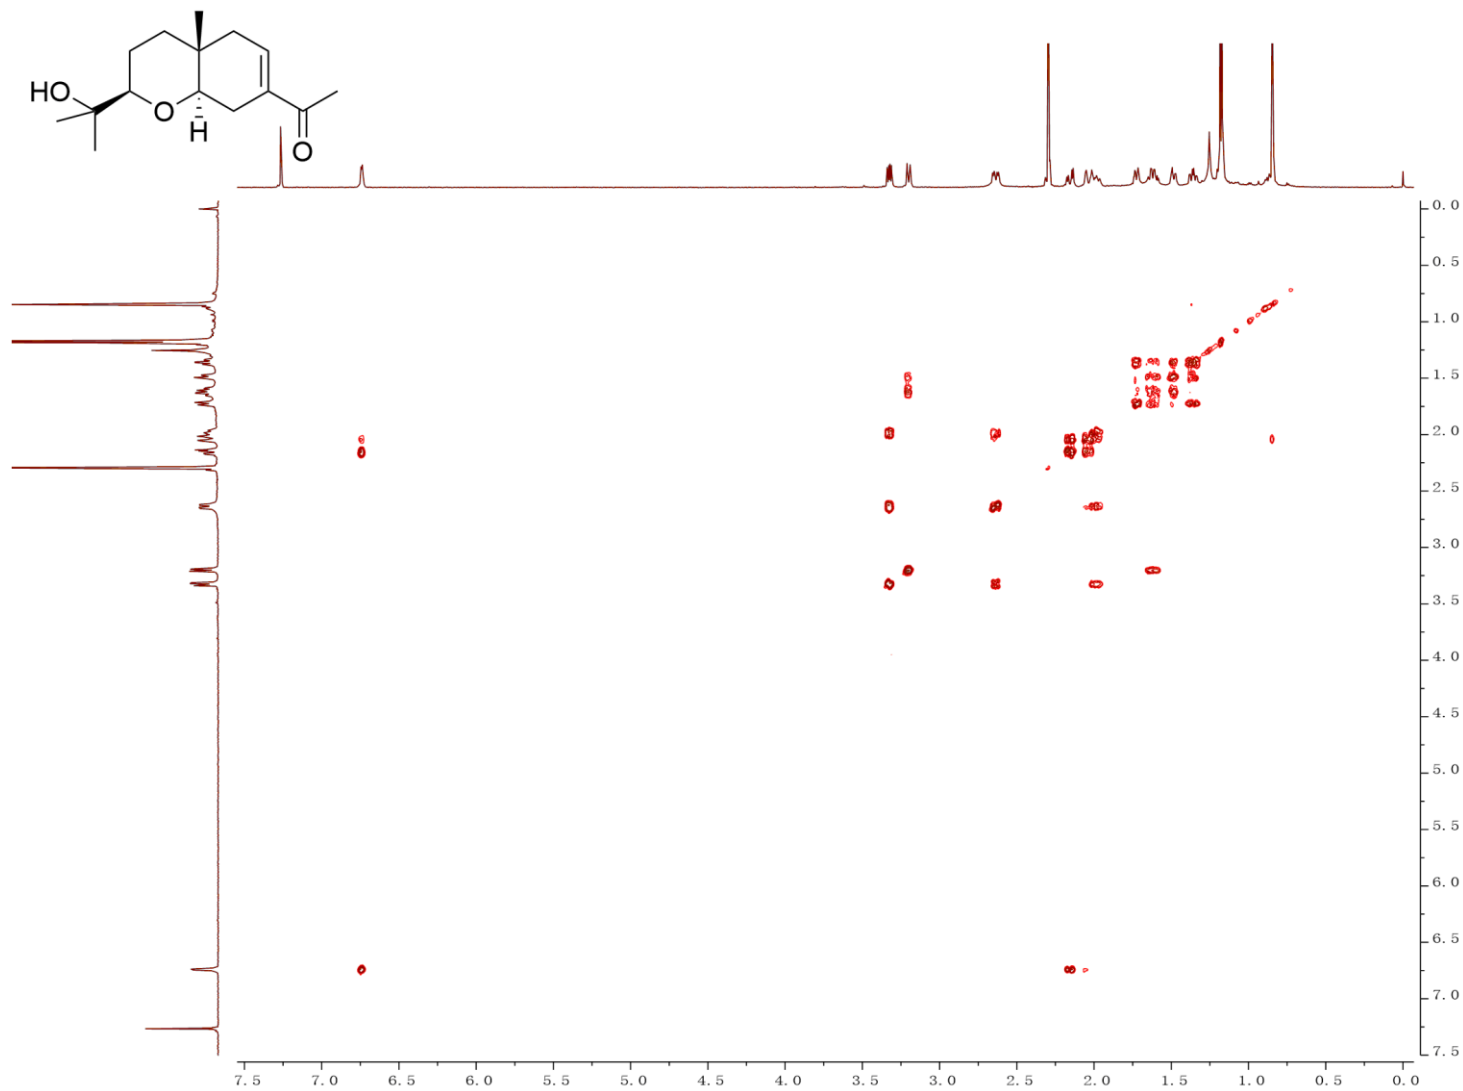

**Fig. S17.**  $^1\text{H}$ - $^1\text{H}$  COSY spectrum ( $\text{CDCl}_3$ , 600 MHz) of **3**



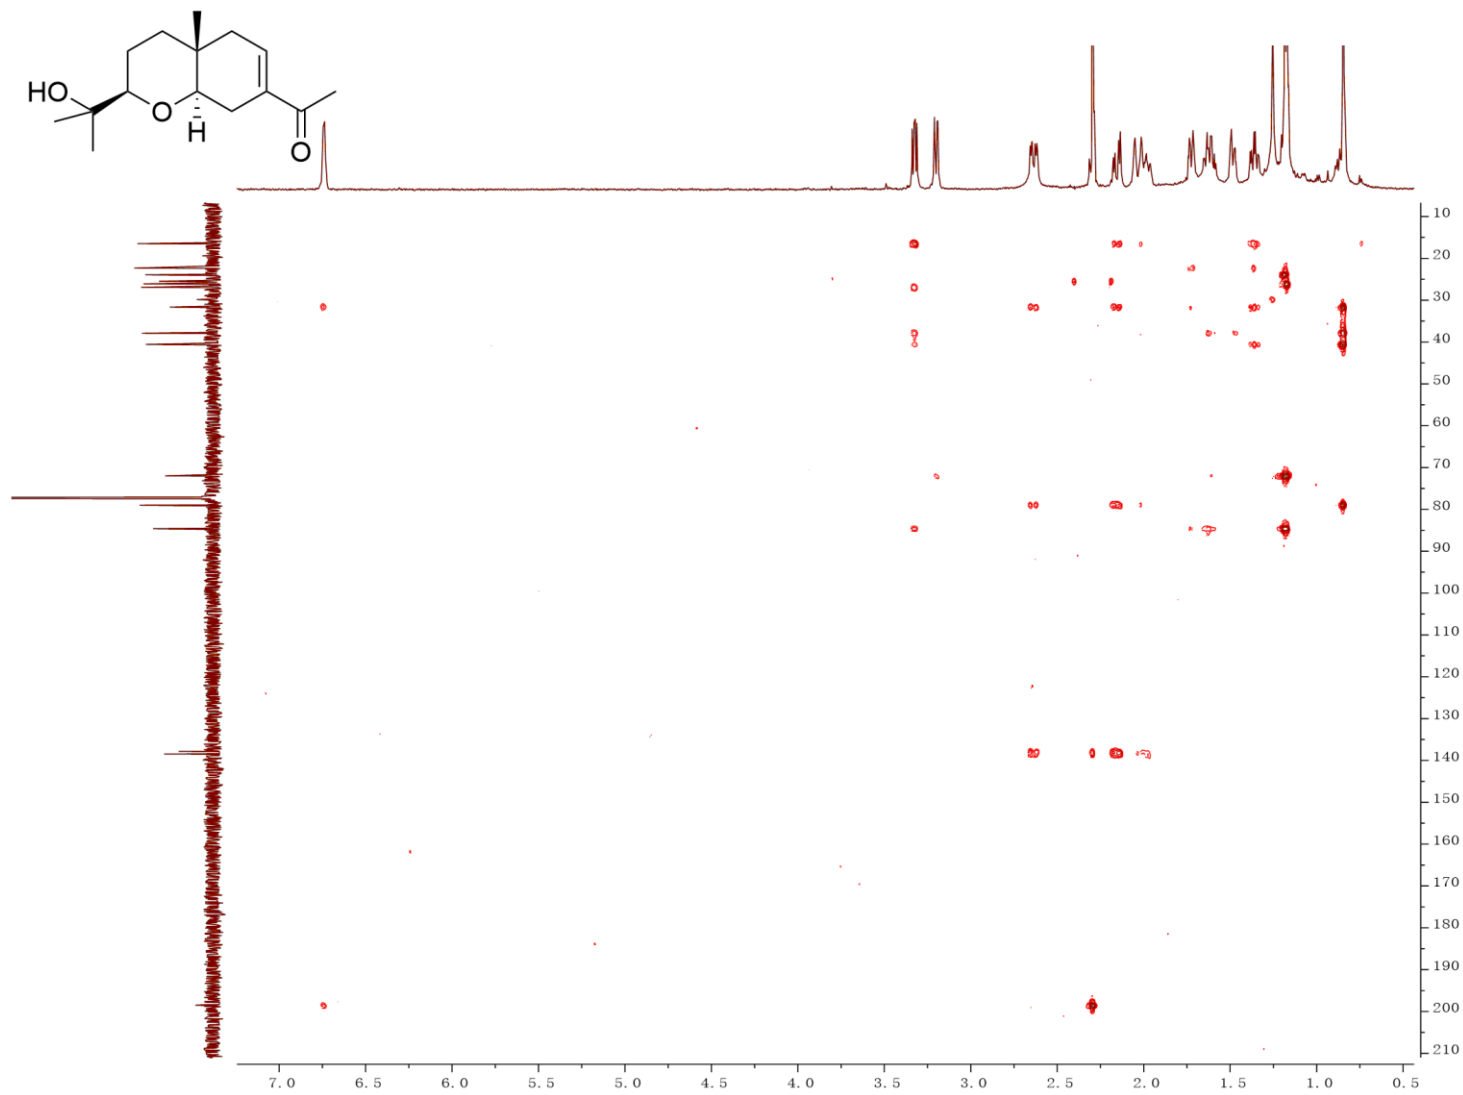

**Fig. S18.** HMBC spectrum (CDCl<sub>3</sub>, 600 MHz) of **3**

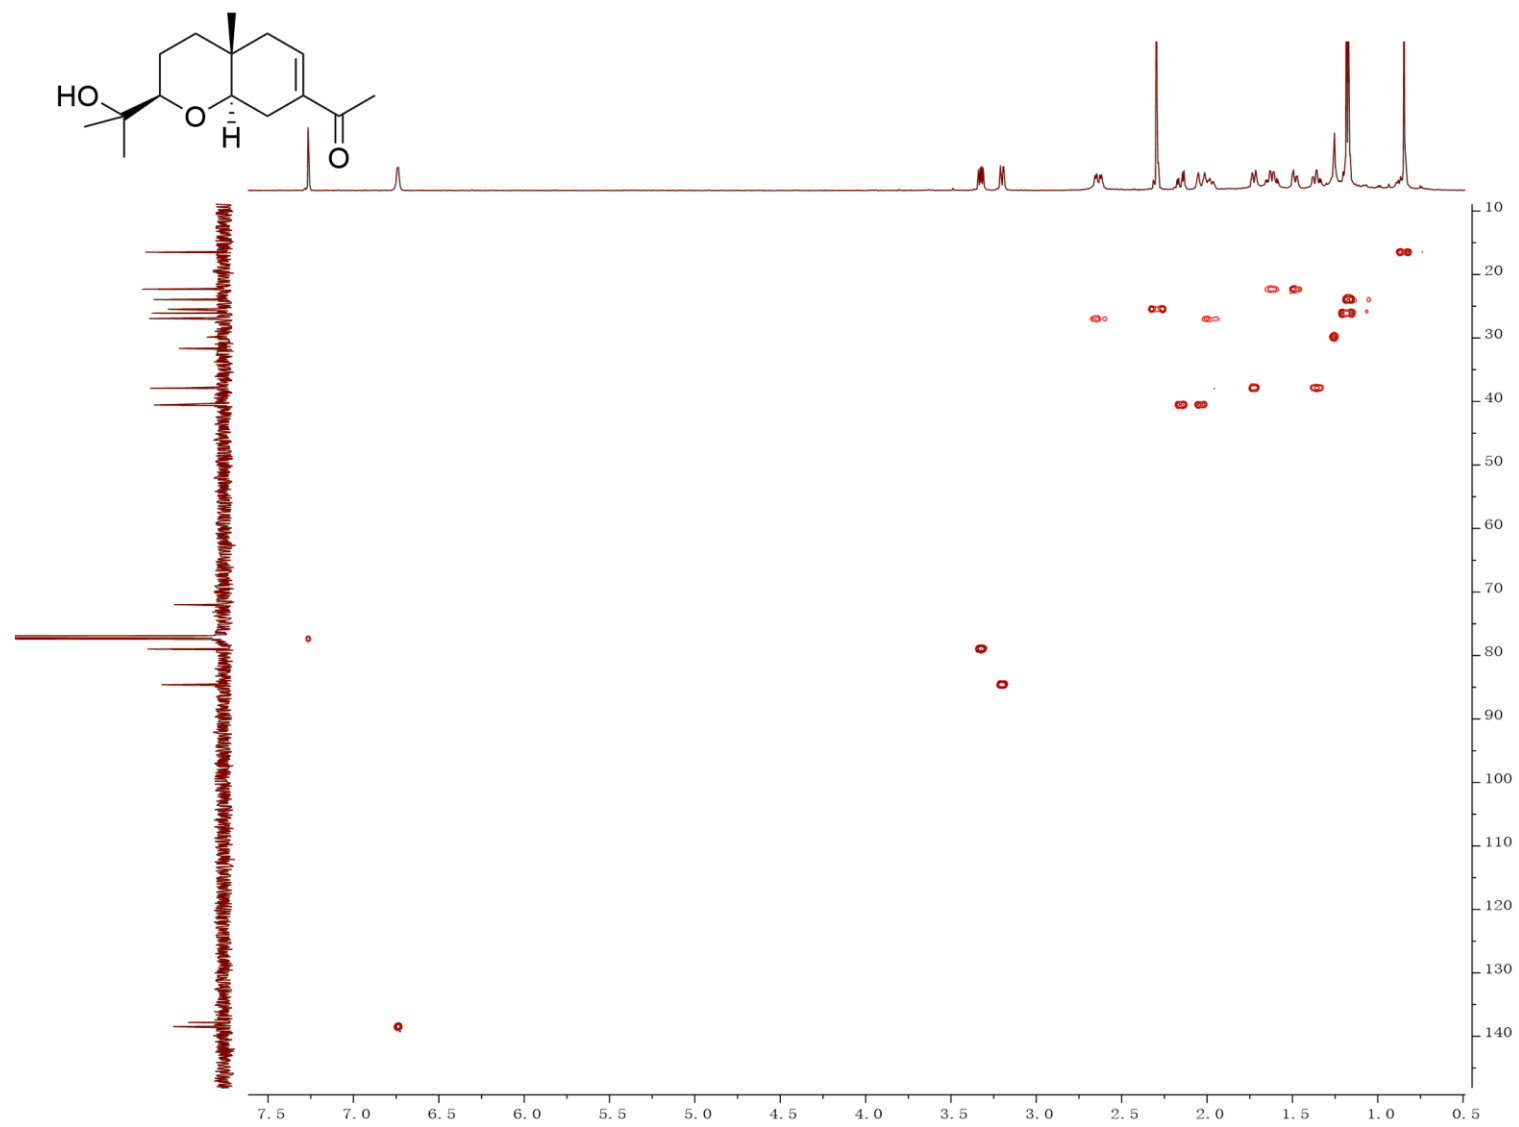

**Fig. S19.** HSQC spectrum (CDCl<sub>3</sub>, 600 MHz) of **3**

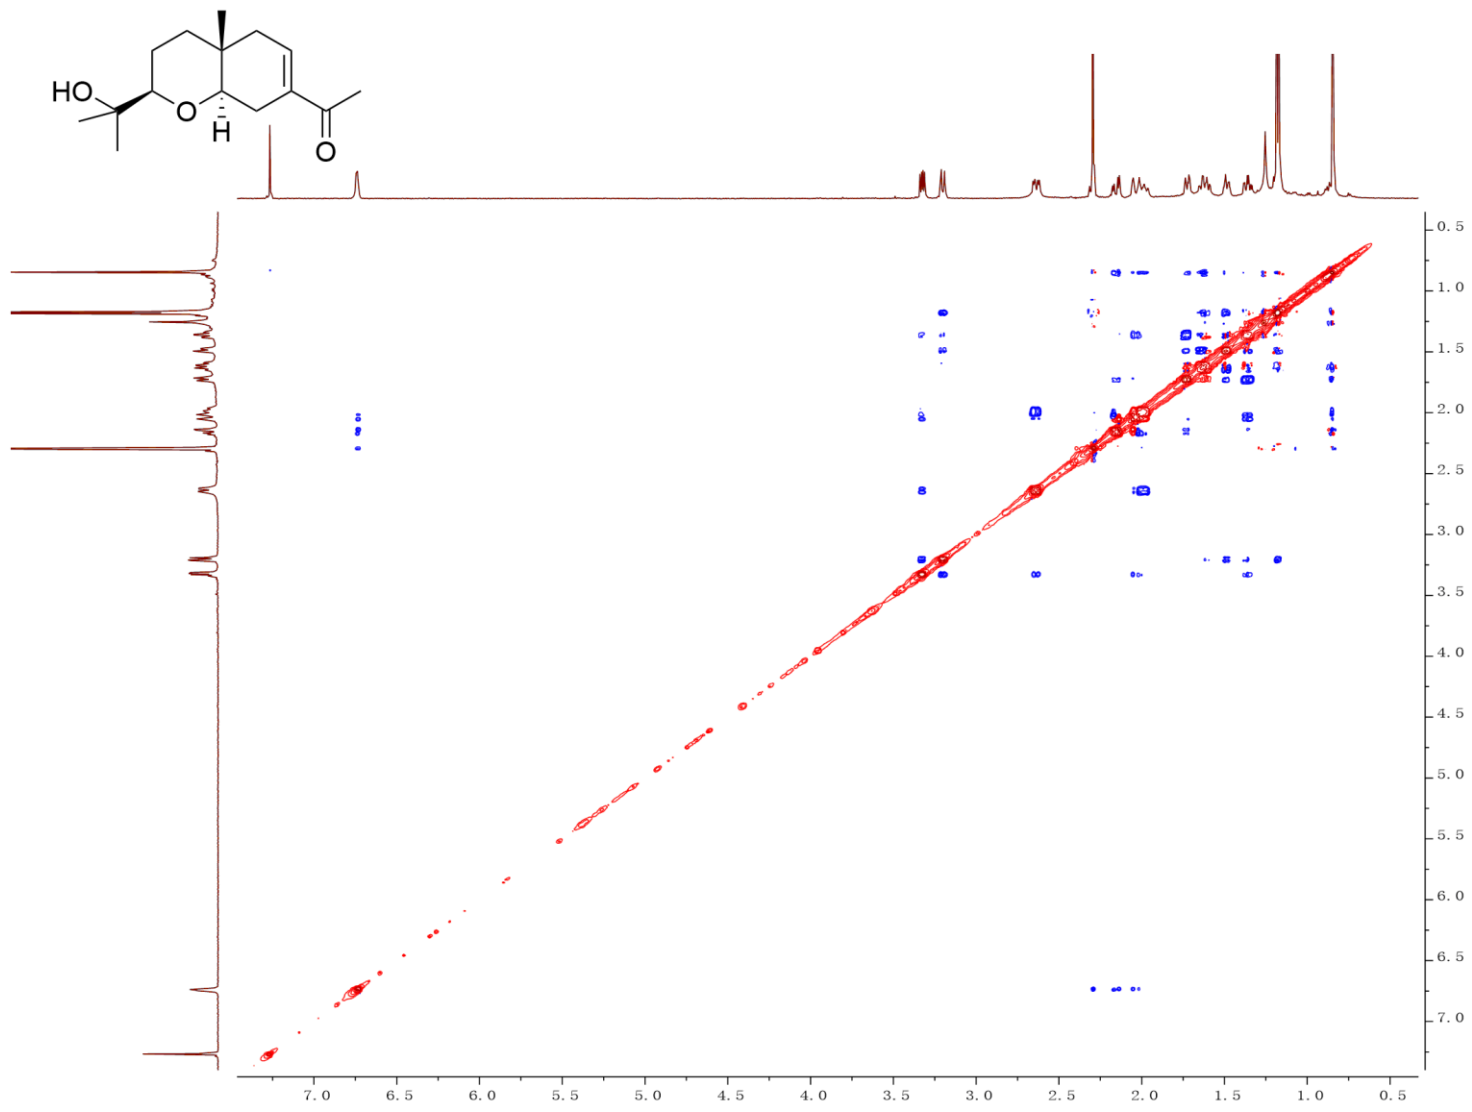

**Fig. S20.** NOESY spectrum (CDCl<sub>3</sub>, 600 MHz) of **3**

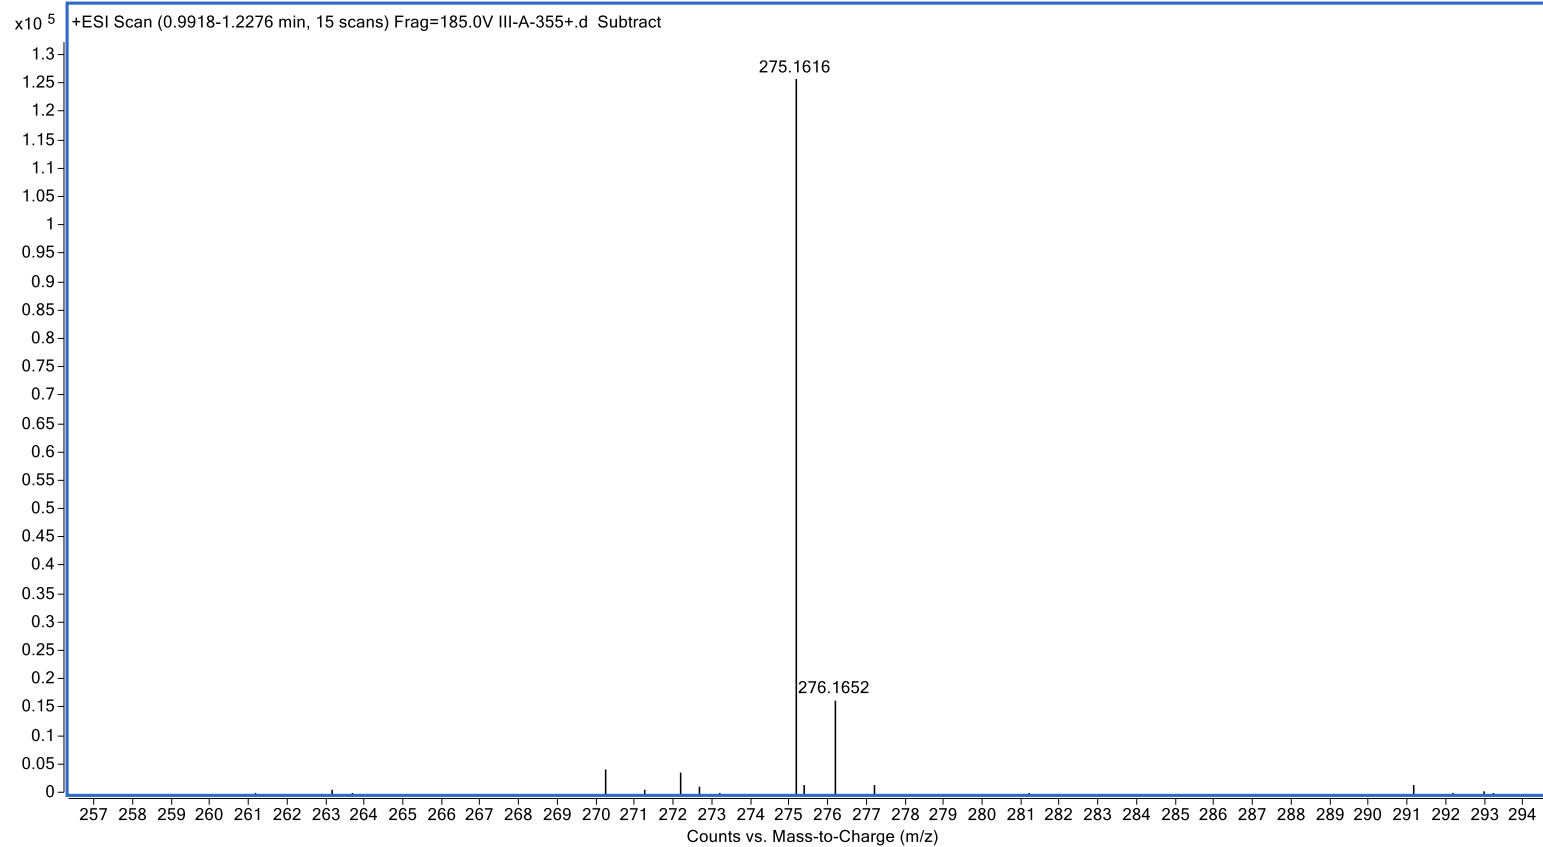

**Fig. S21.** (+)-HR-ESI-MS (positive mode) of **3**

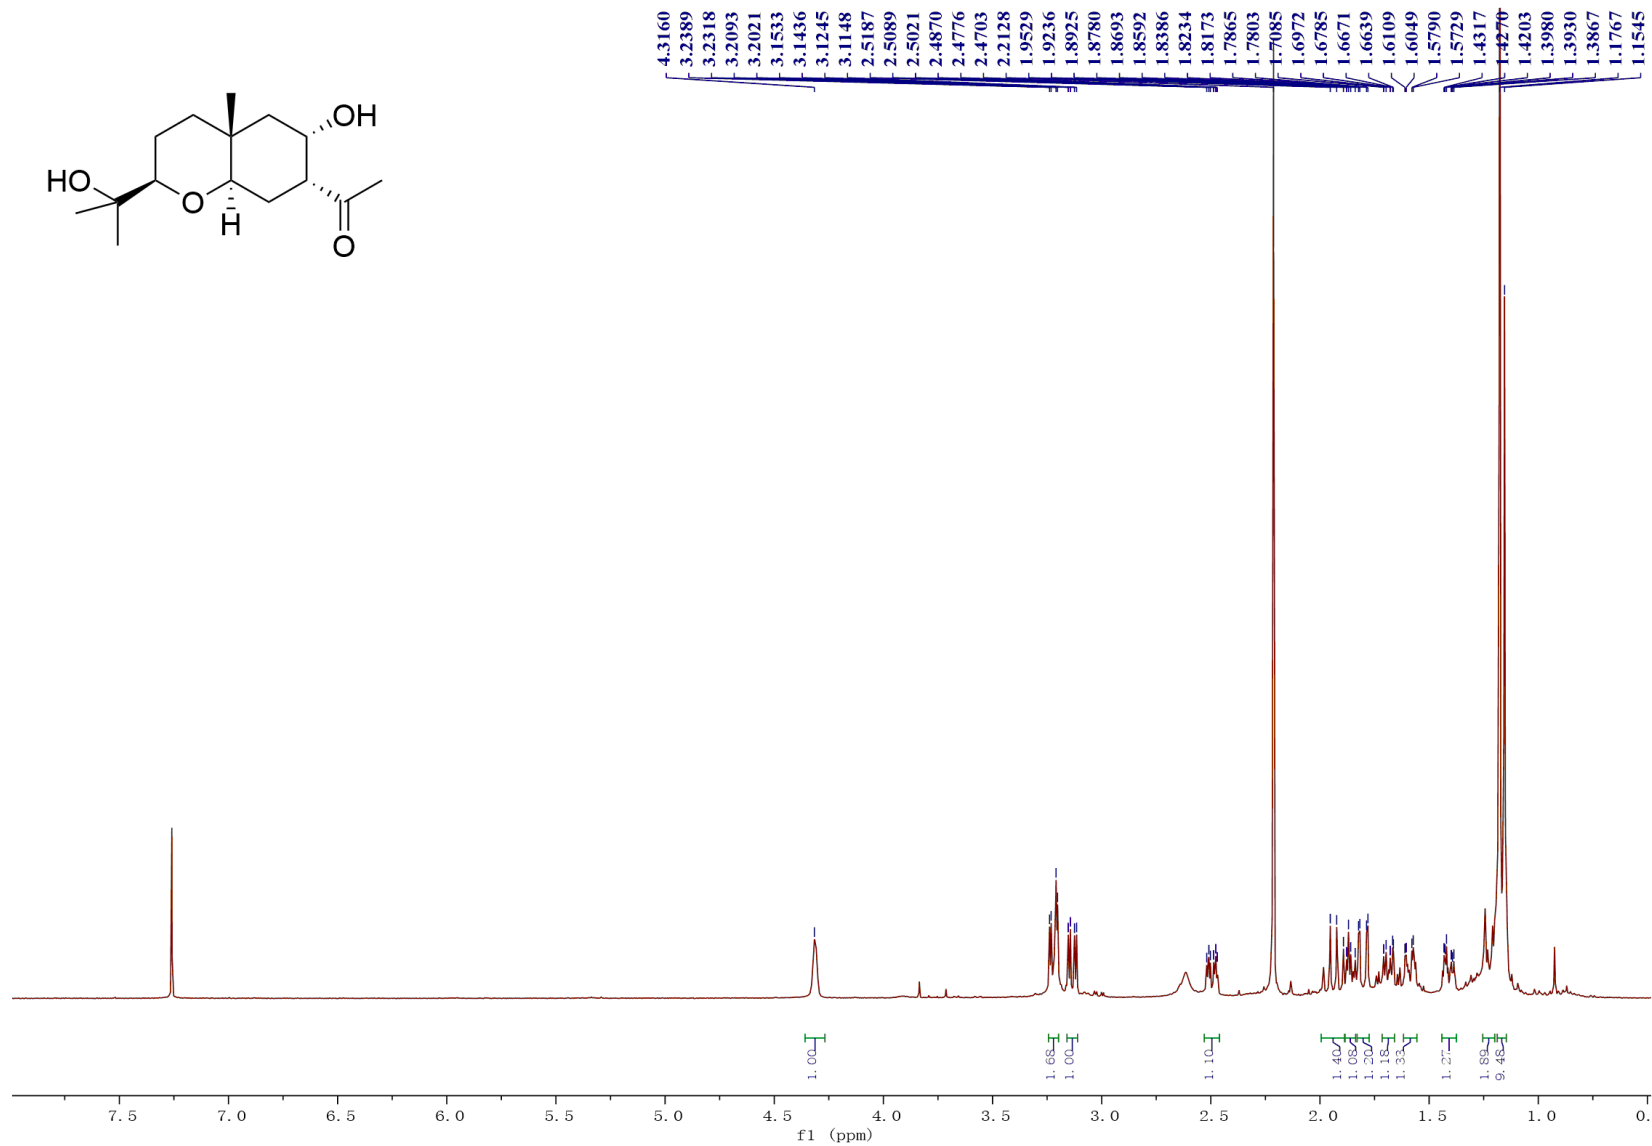

Fig. S22. <sup>1</sup>H NMR spectrum (CDCl<sub>3</sub>, 400 MHz) of 4

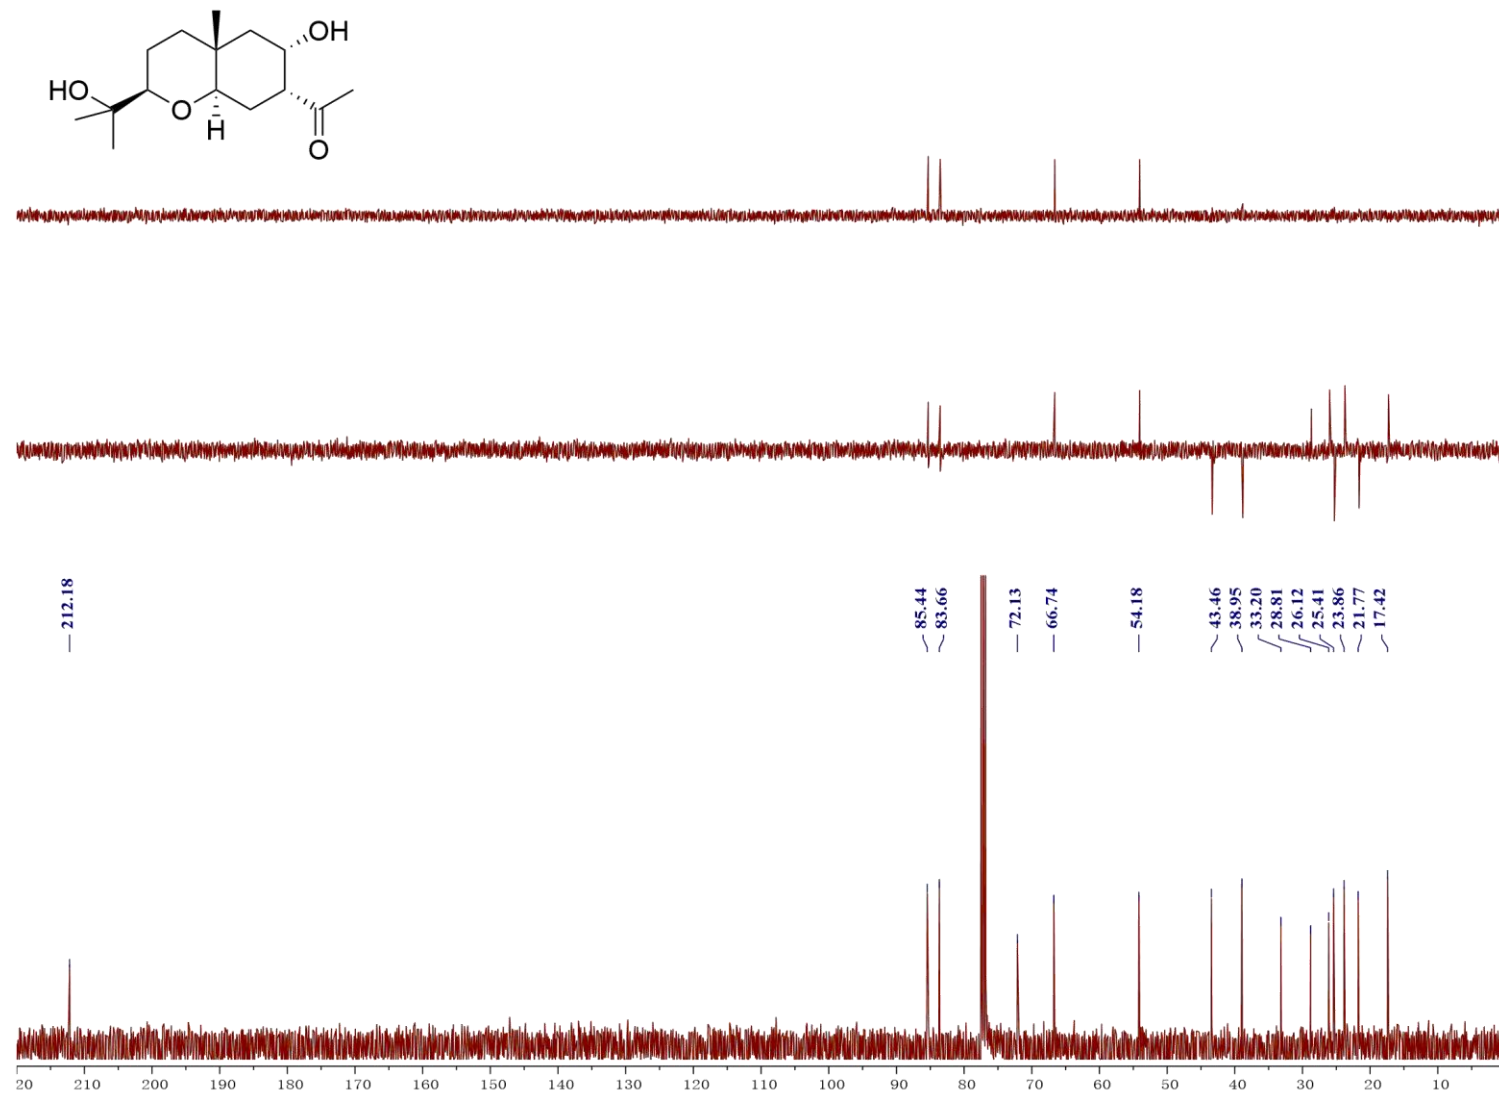

Fig. S23.  $^{13}\text{C}$  and DEPT spectra ( $\text{CDCl}_3$ , 100 MHz) of 4

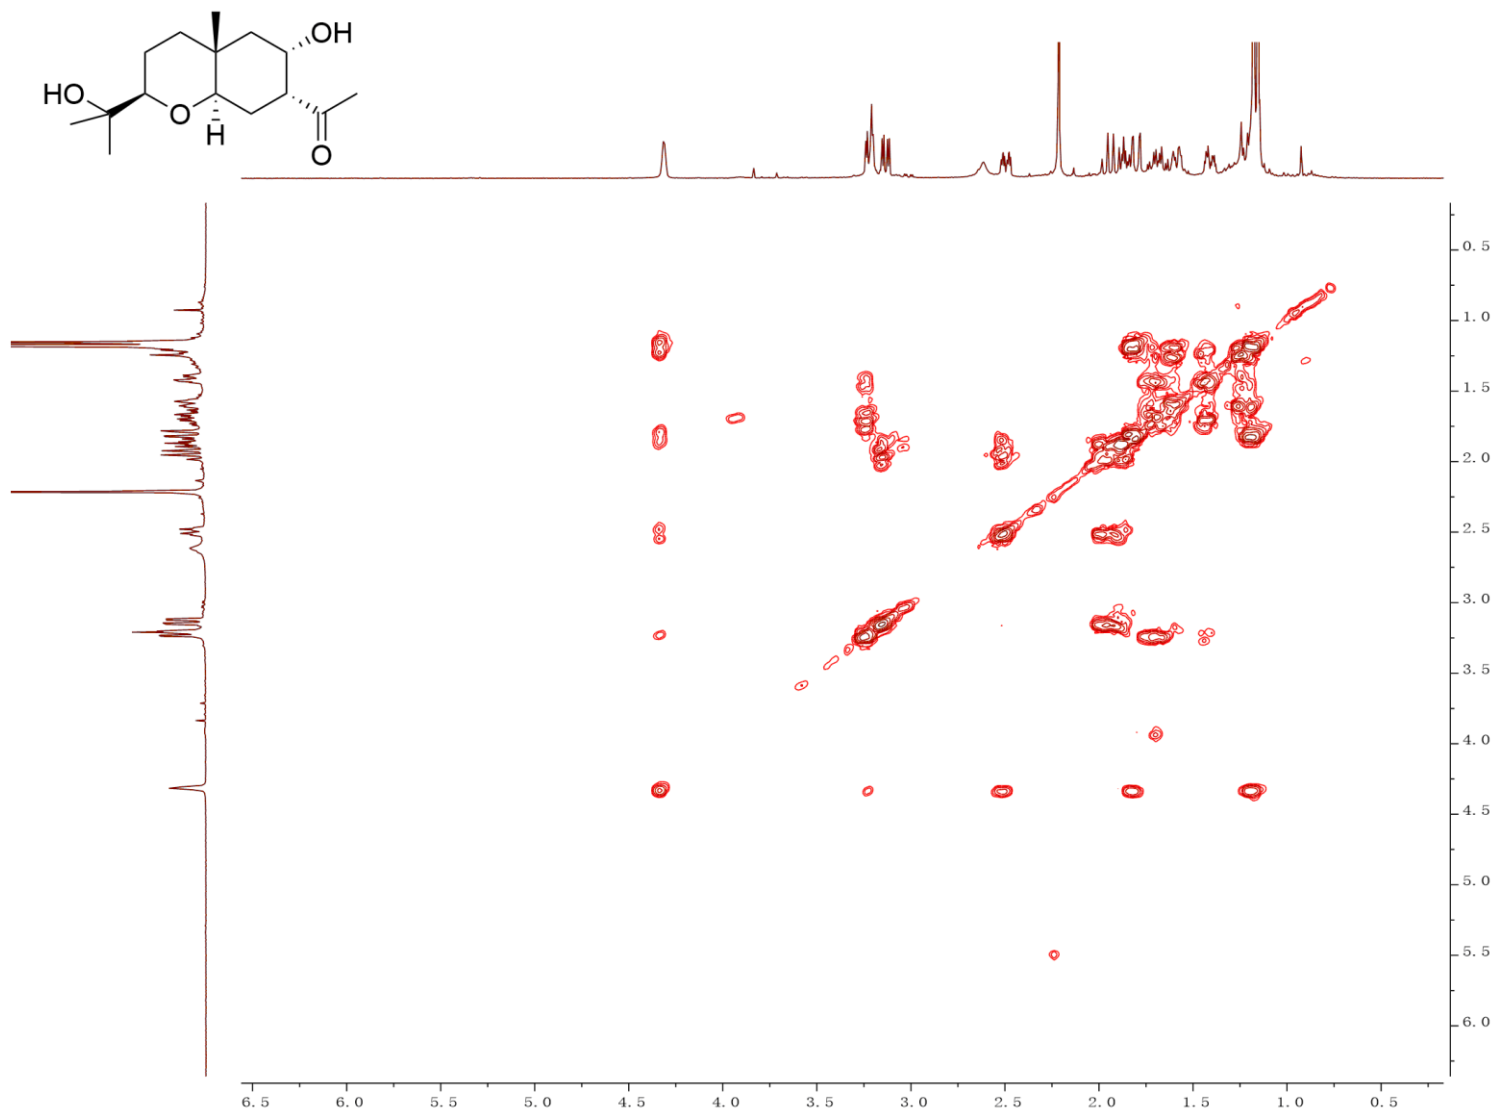

**Fig. S24.**  $^1\text{H}$ - $^1\text{H}$  COSY spectrum ( $\text{CDCl}_3$ , 400 MHz) of **4**

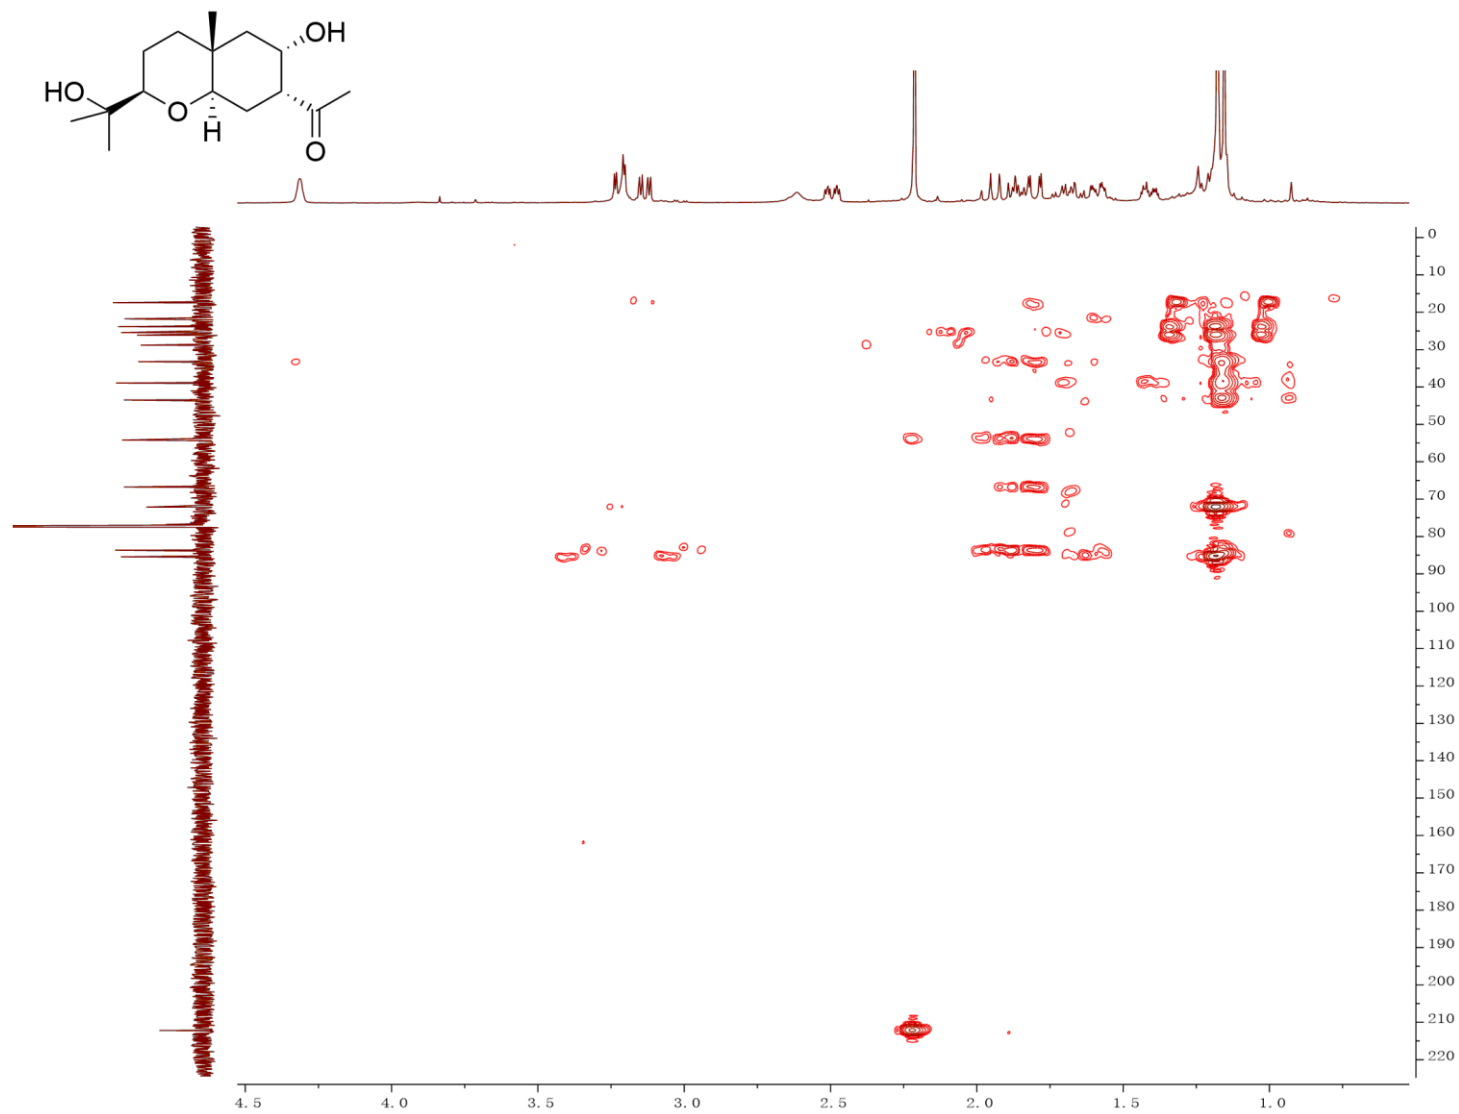

**Fig. S25.** HMBC spectrum (CDCl<sub>3</sub>, 400 MHz) of **4**



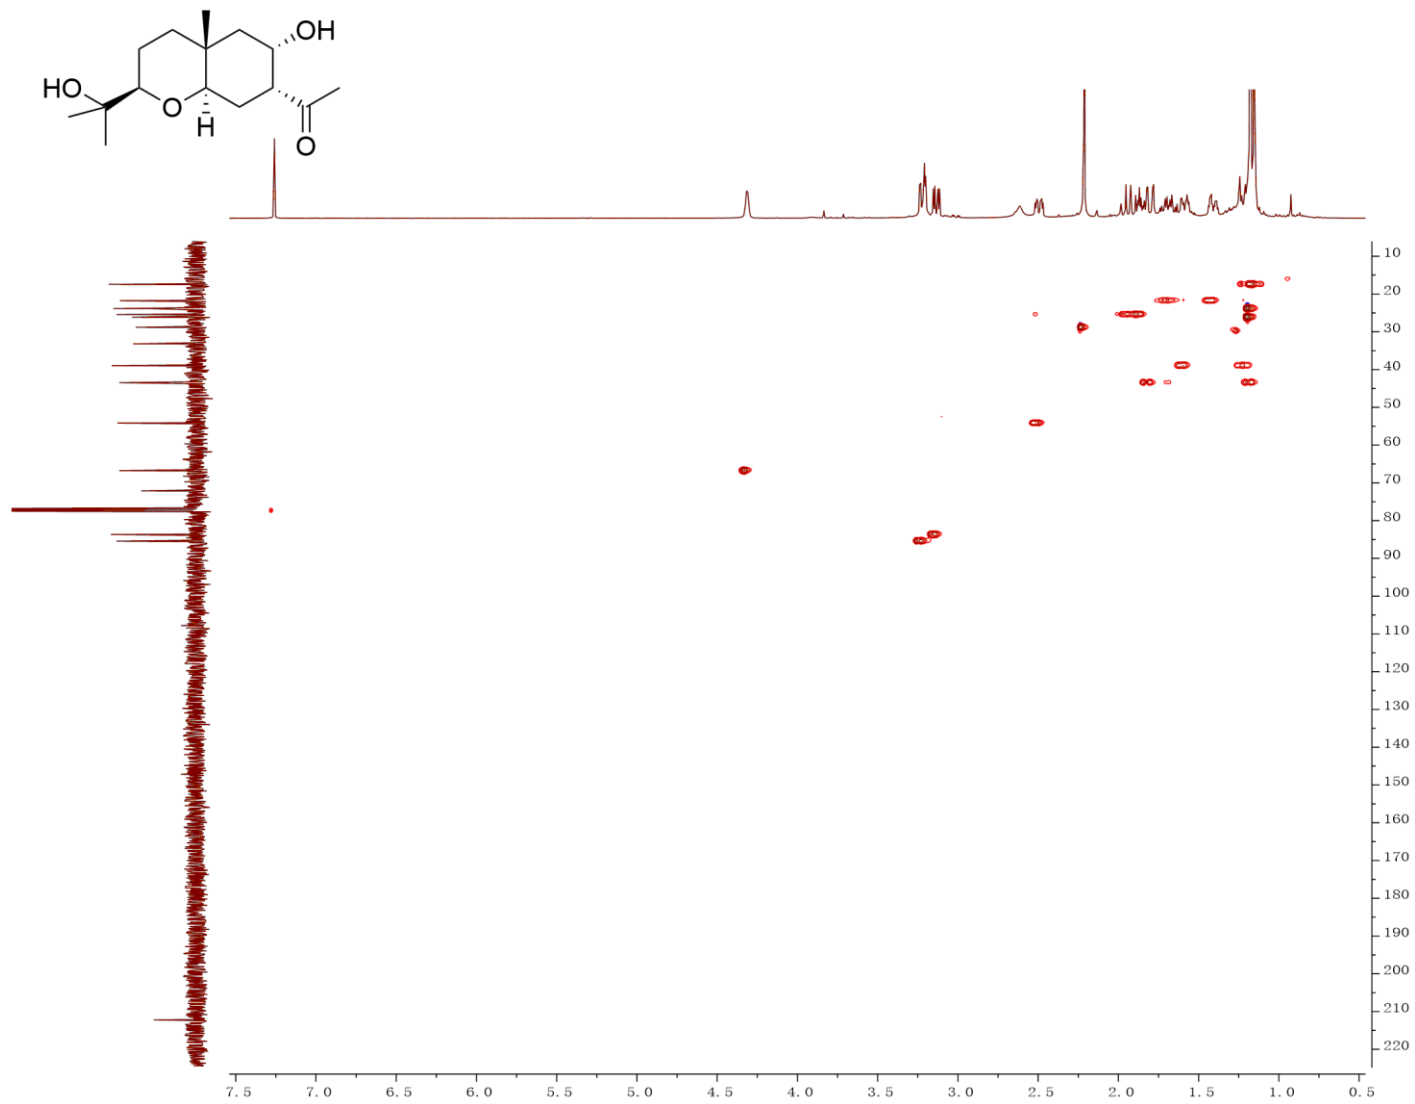

**Fig. S26.** HSQC spectrum (CDCl<sub>3</sub>, 400 MHz) of **4**

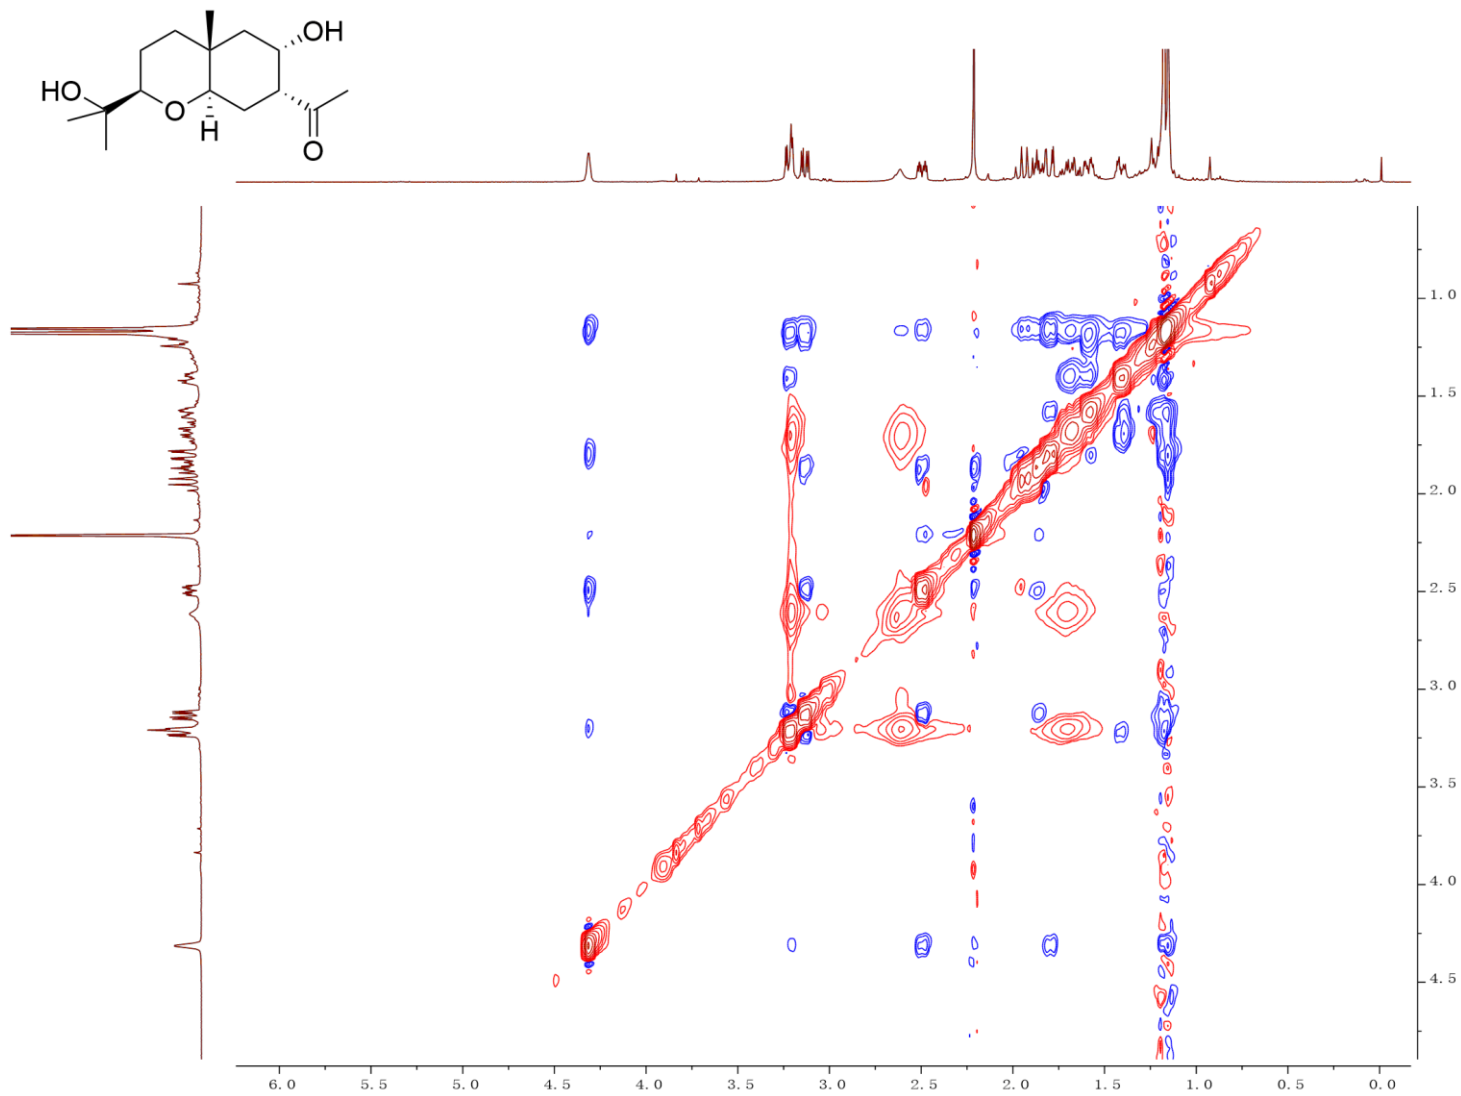

**Fig. S27.** NOESY spectrum (CDCl<sub>3</sub>, 400 MHz) of **4**

210A #47 RT: 0.93 AV: 1 NL: 5.50E7  
T: FTMS + c ESI Full ms [50.00-500.00]

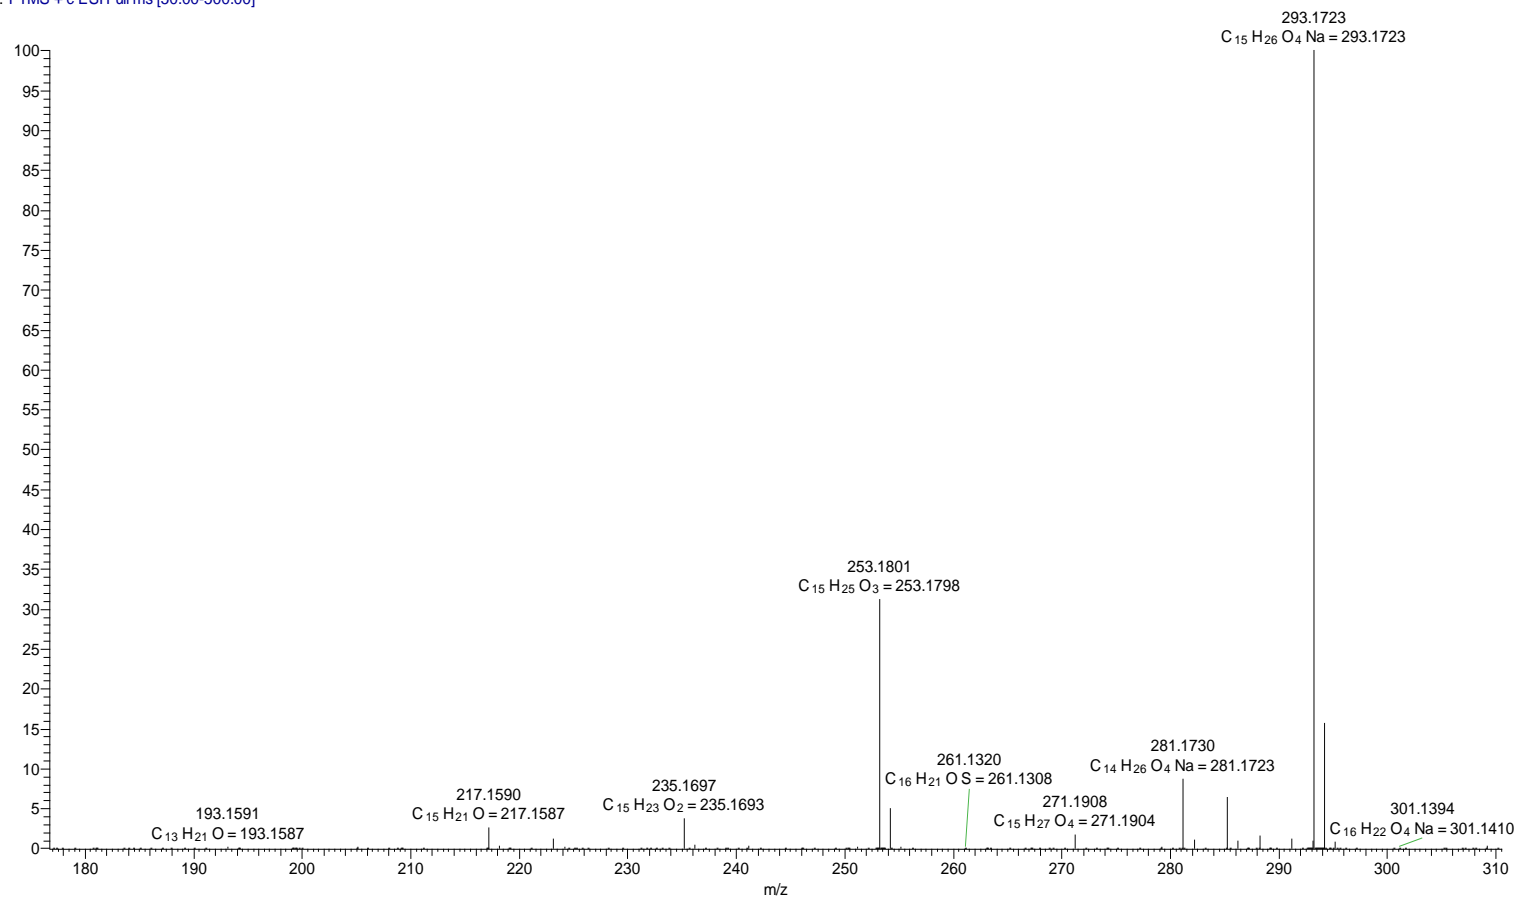

**Fig. S28.** (+)-HR-ESI-MS (positive mode) of **4**

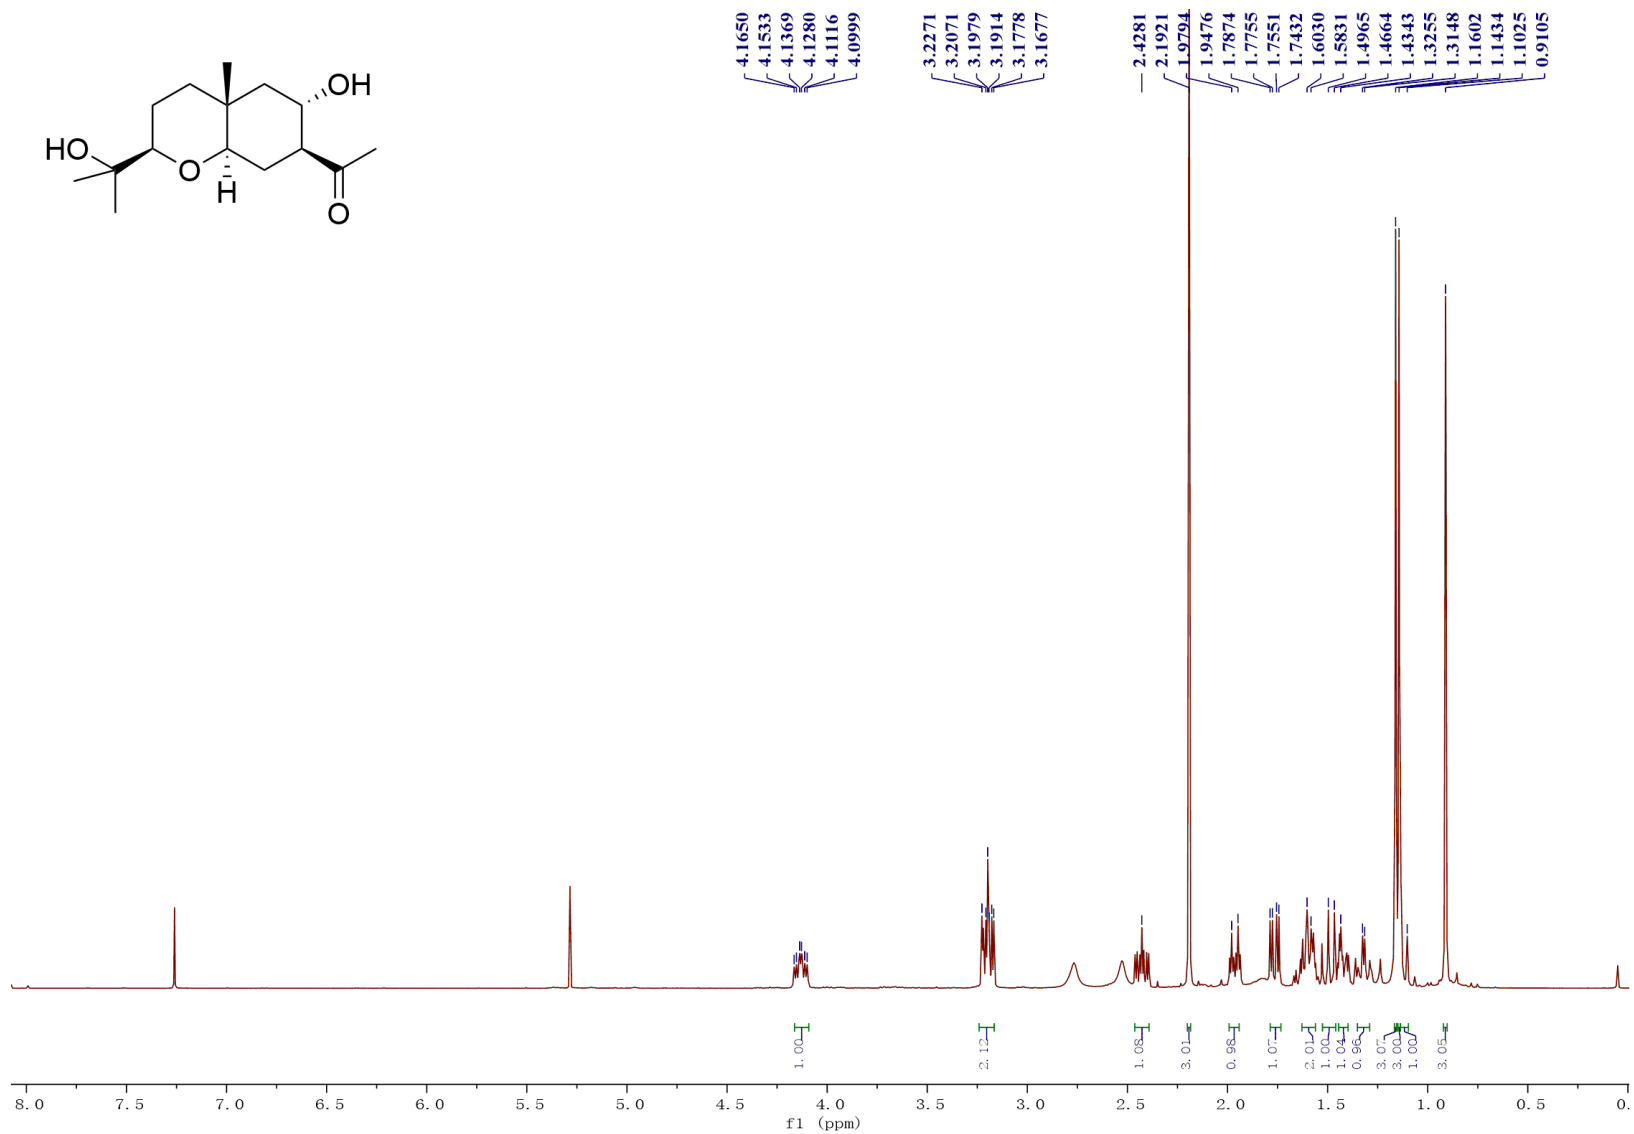

**Fig. S29.** <sup>1</sup>H NMR spectrum (CDCl<sub>3</sub>, 400 MHz) of **5**

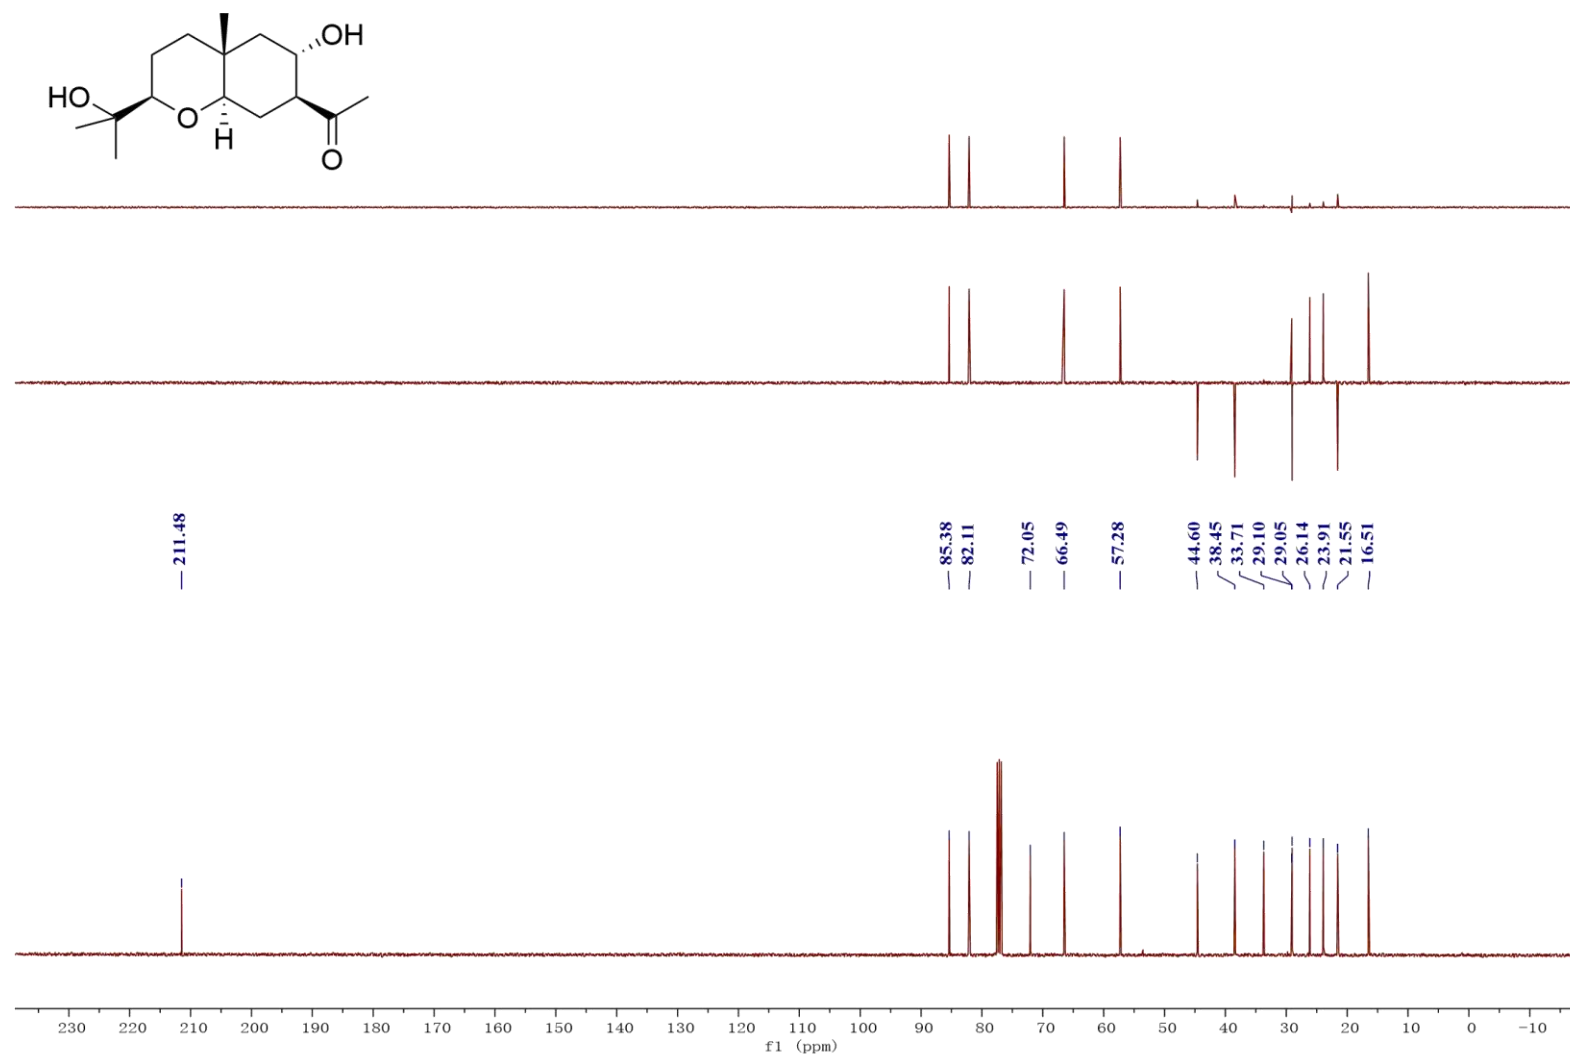

**Fig. S30.**  $^{13}\text{C}$  and DEPT spectra ( $\text{CDCl}_3$ , 100 MHz) of **5**

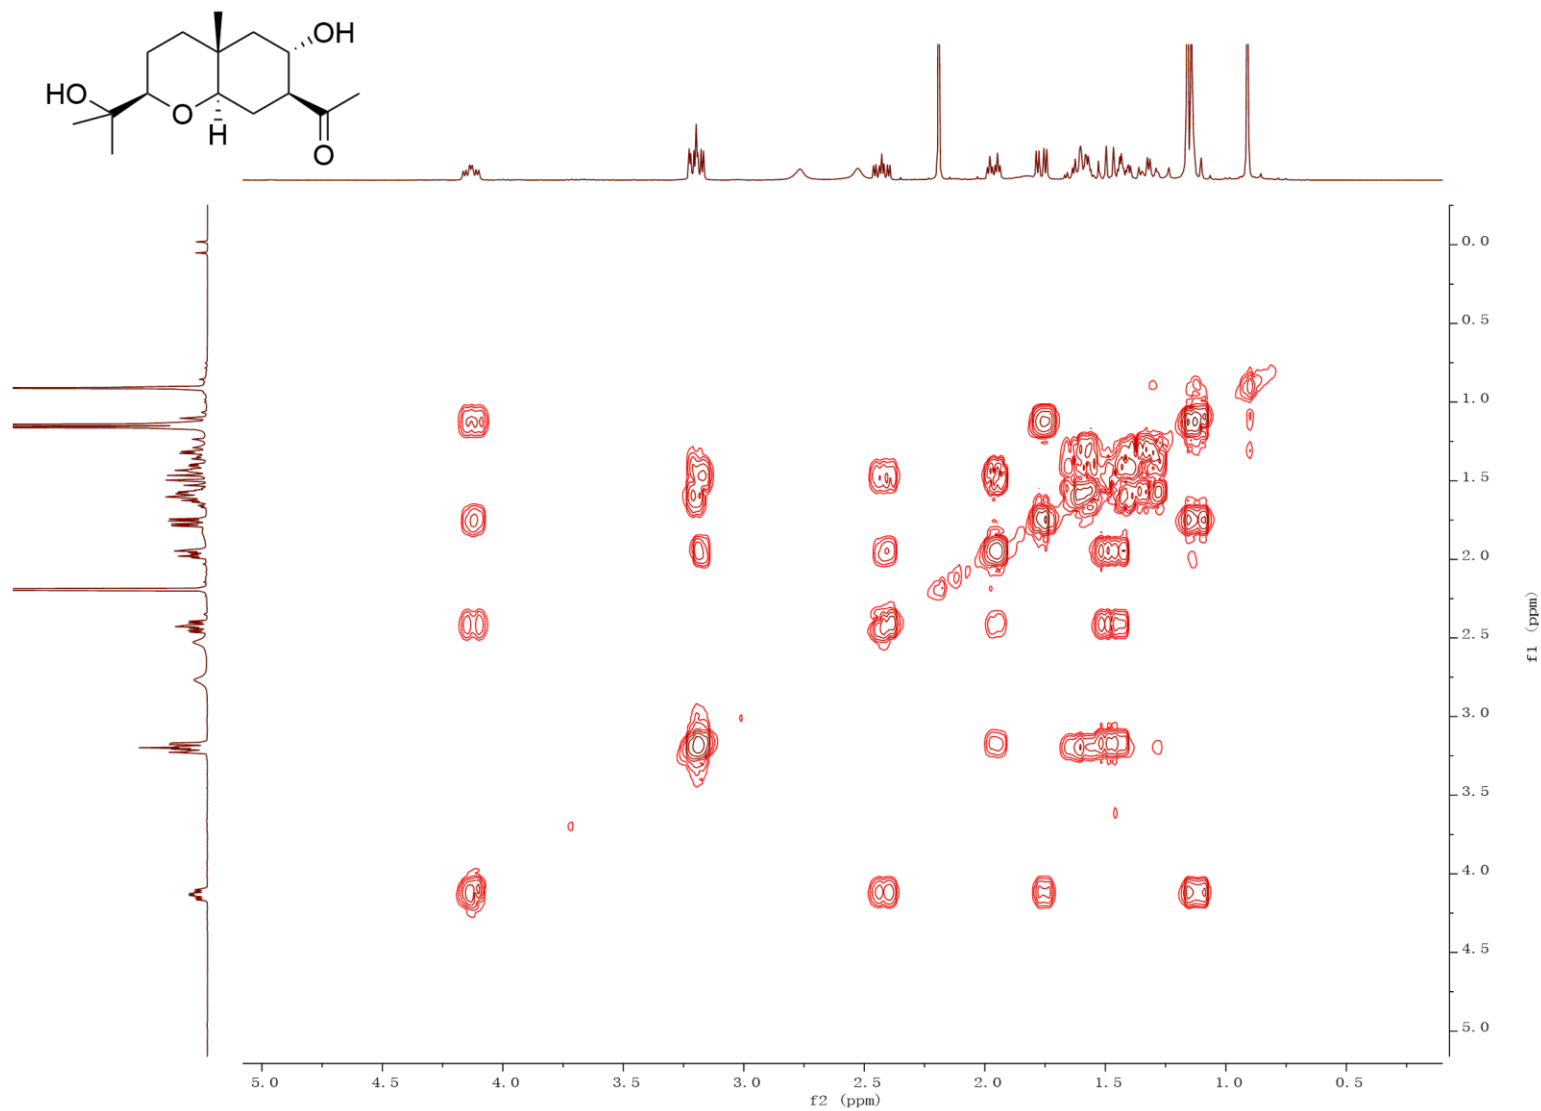

**Fig. S31.**  $^1\text{H}$ - $^1\text{H}$  COSY spectrum ( $\text{CDCl}_3$ , 400 MHz) of **5**

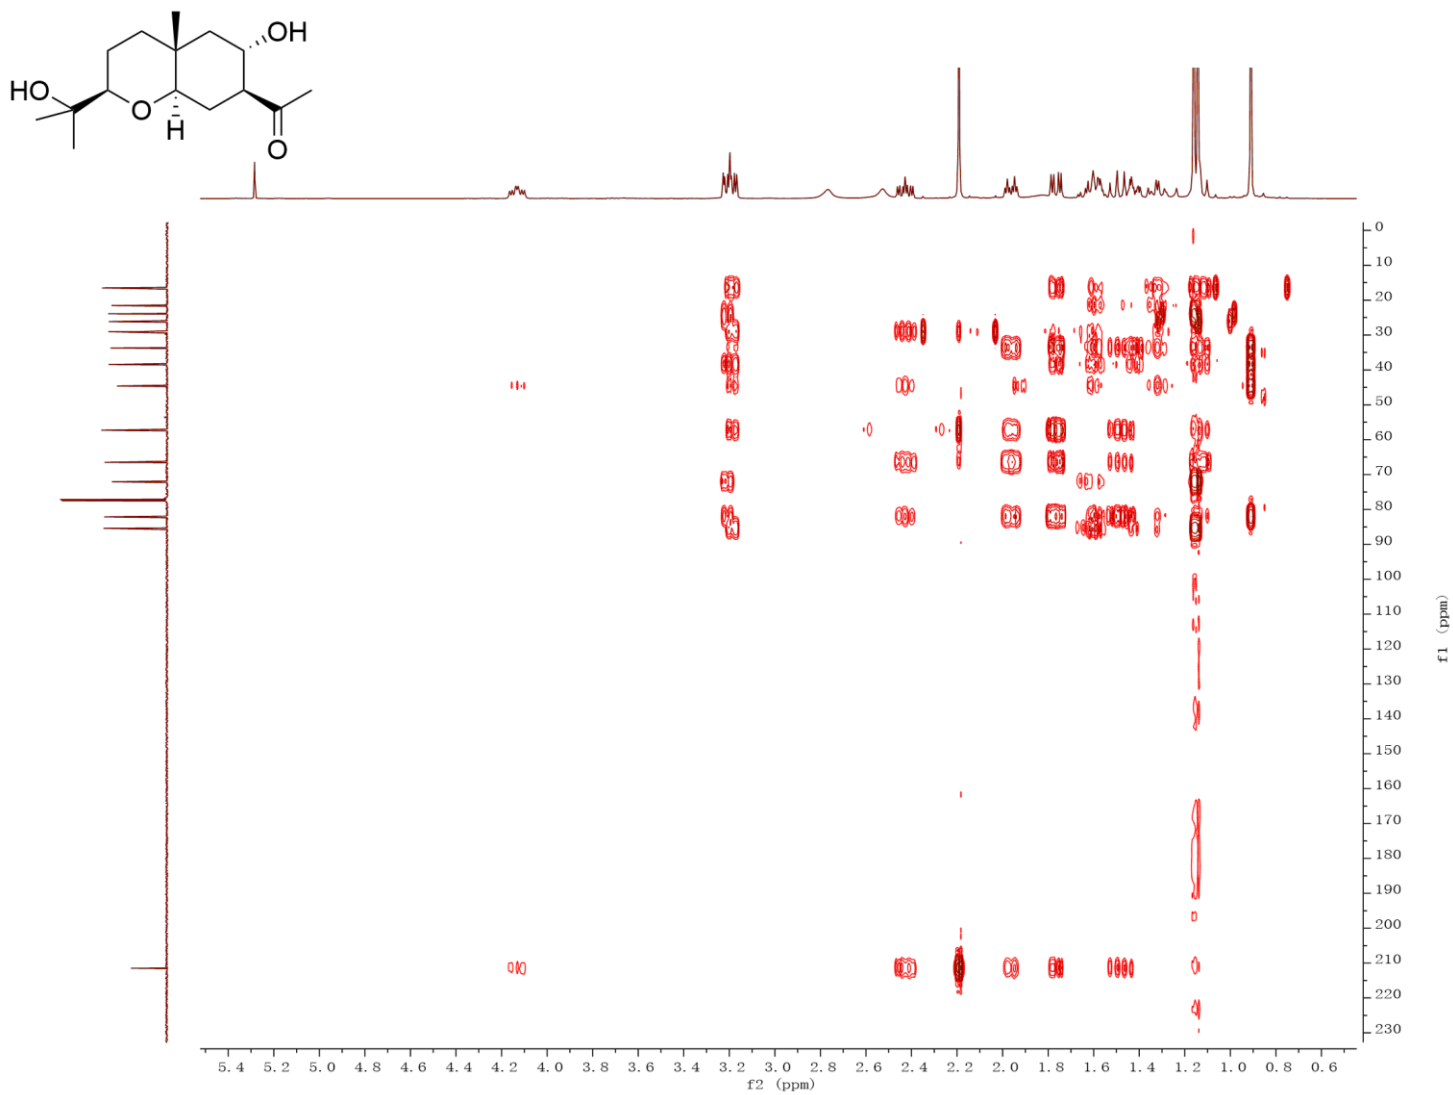

**Fig. S32.** HMBC spectrum (CDCl<sub>3</sub>, 400 MHz) of **5**

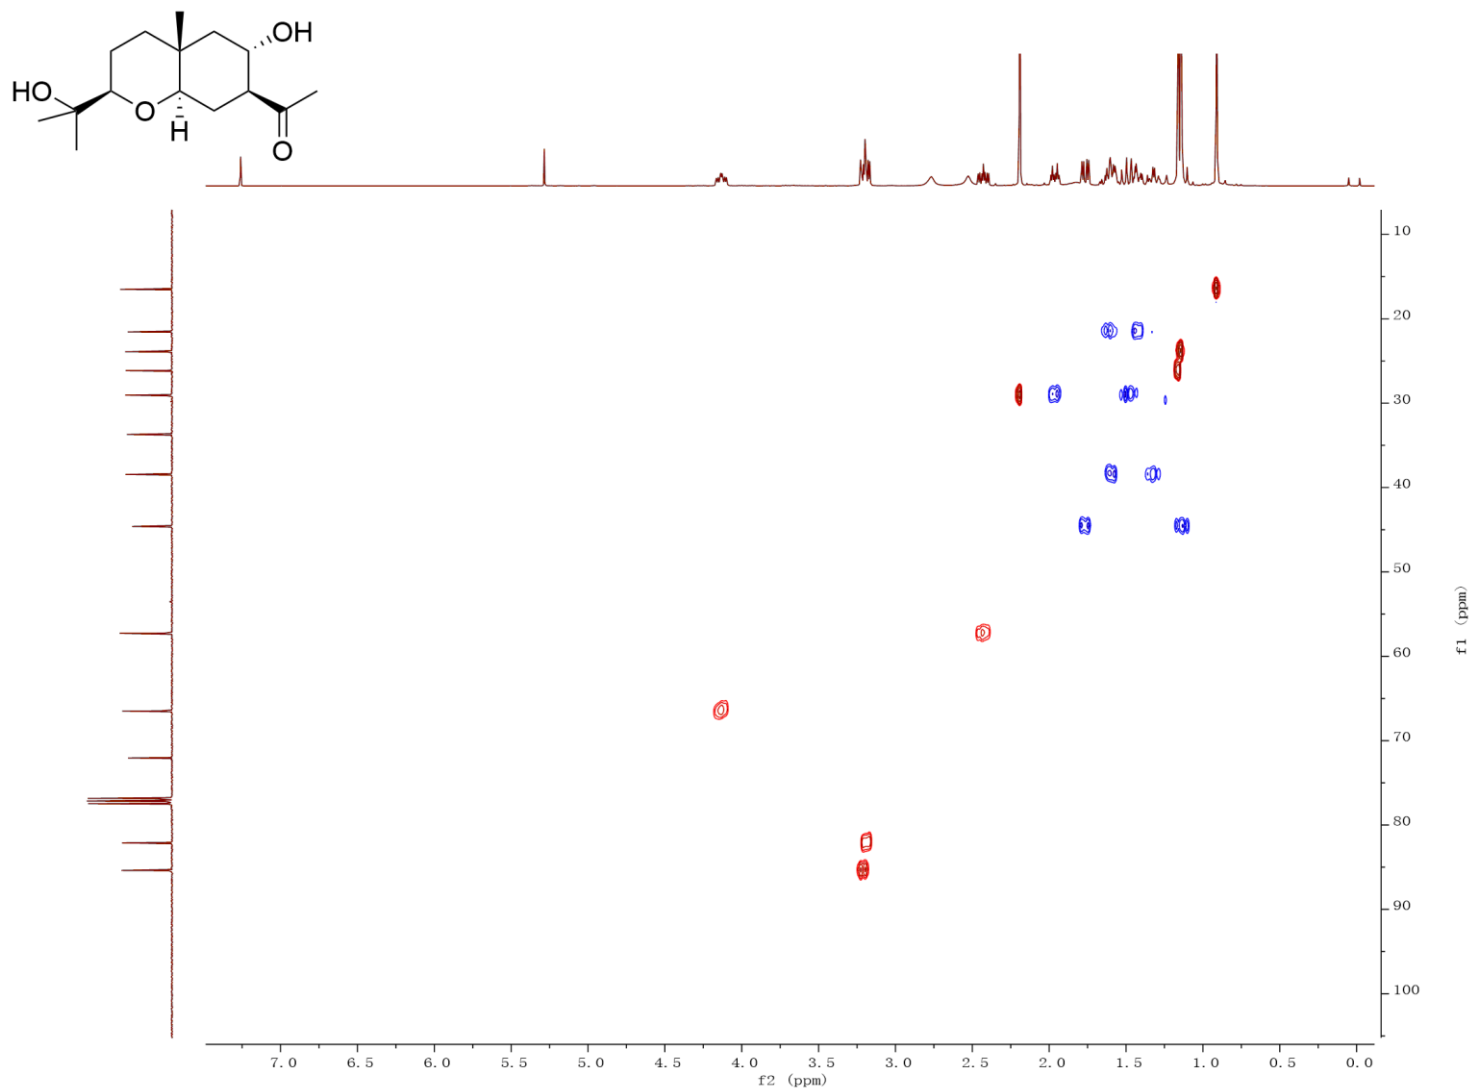

**Fig. S33.** HSQC spectrum (CDCl<sub>3</sub>, 400 MHz) of **5**



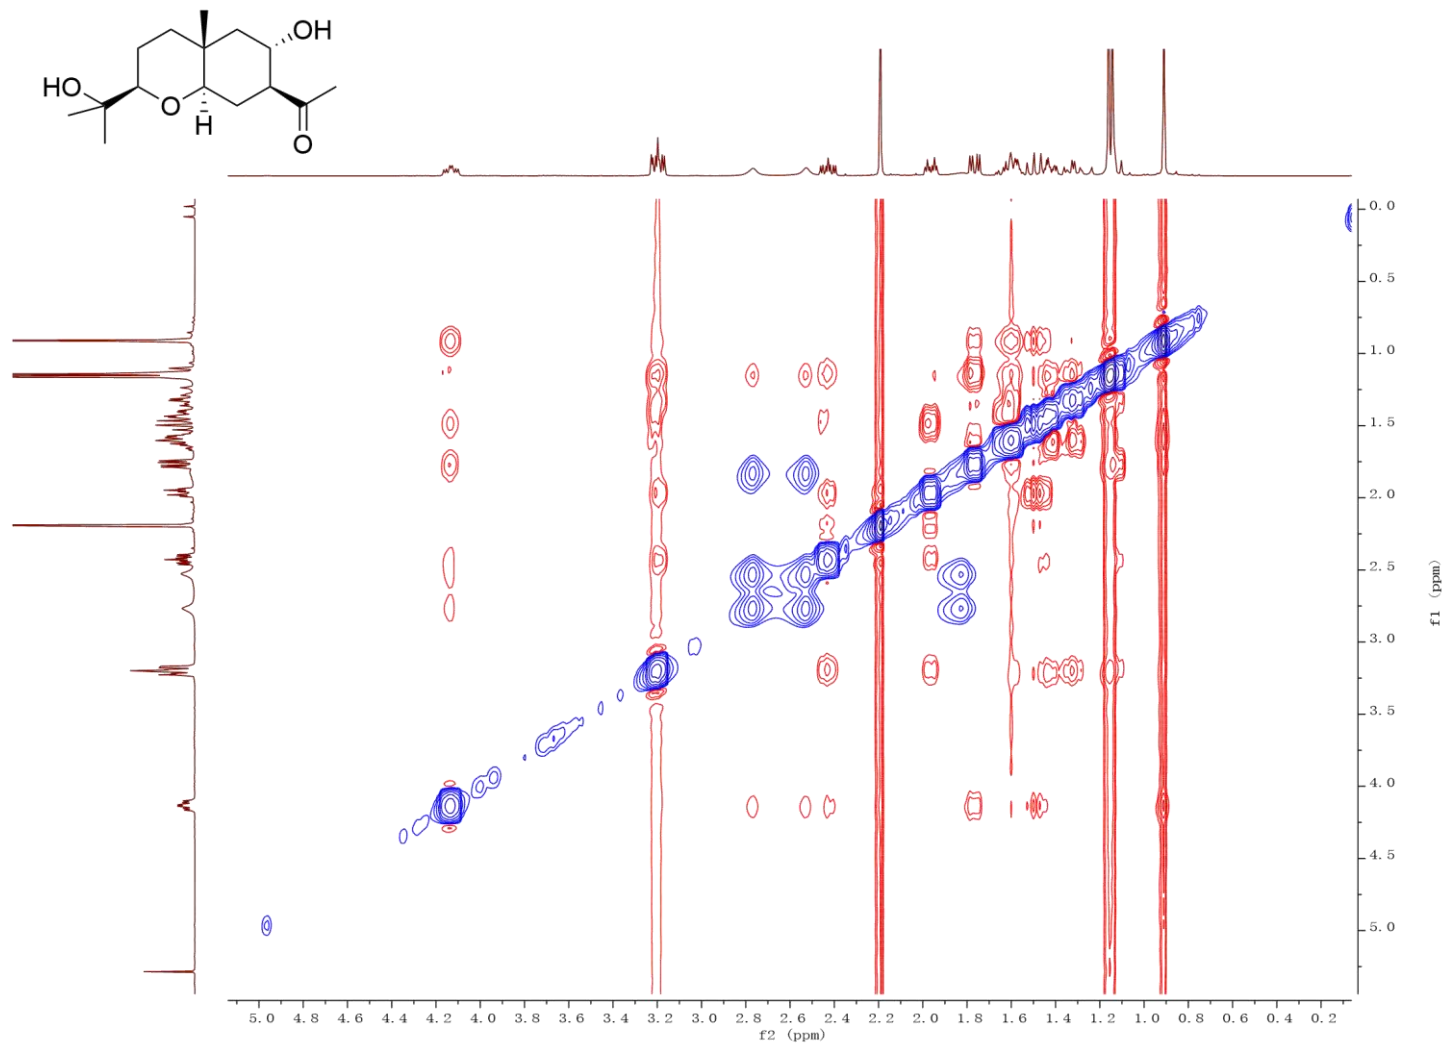

**Fig. S34.** NOESY spectrum (CDCl<sub>3</sub>, 400 MHz) of **5**

DJ1-III7221-IA111 #44 RT: 0.89 AV: 1 NL: 1.73E7  
T: FTMS + c ESI Full ms [100.00-850.00]

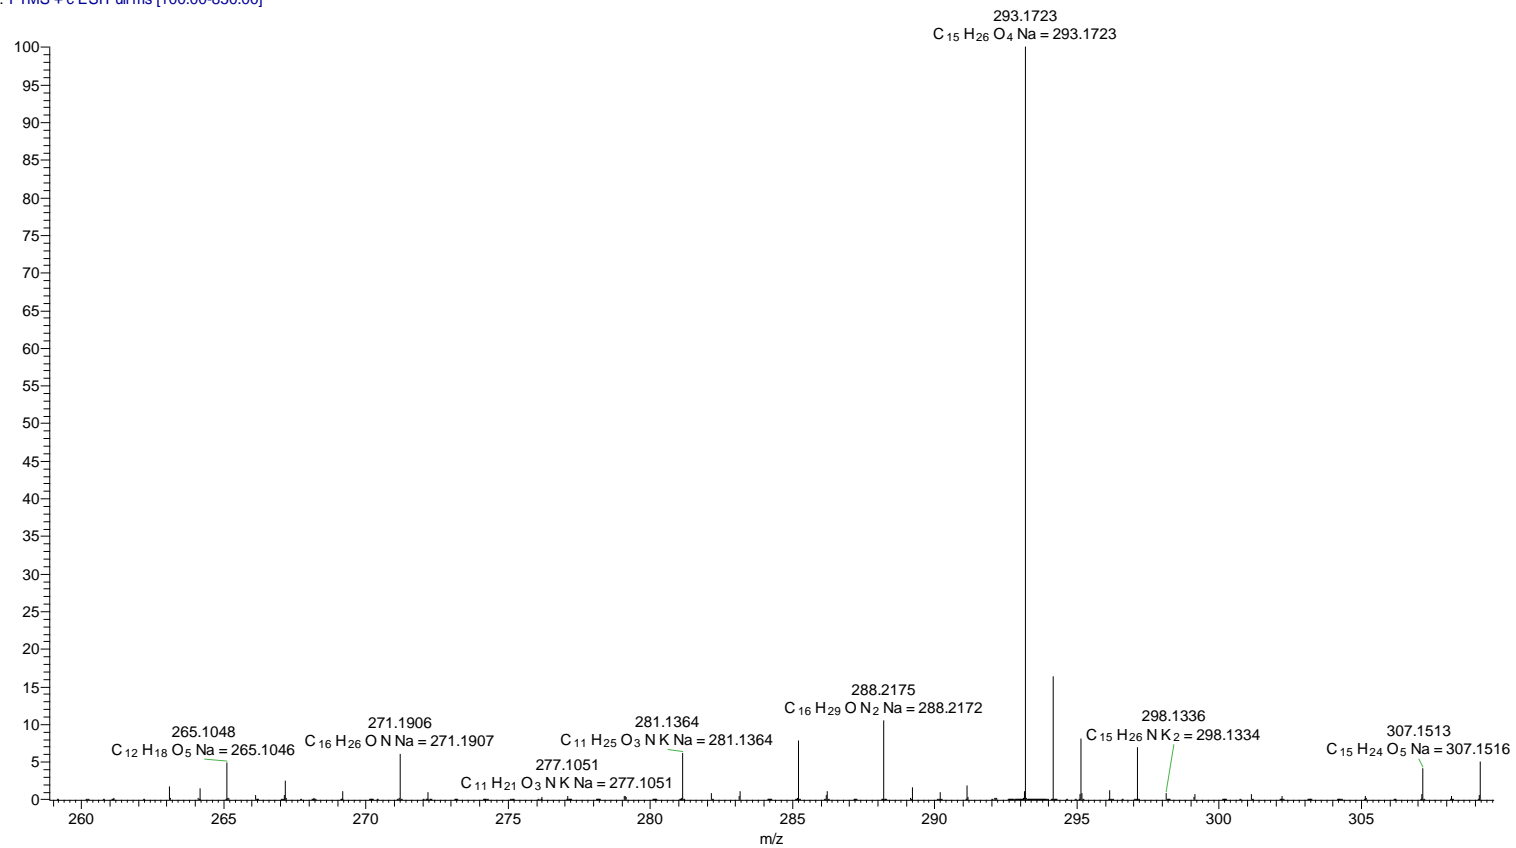

**Fig. S35.** (+)-HR-ESI-MS (positive mode) of **5**

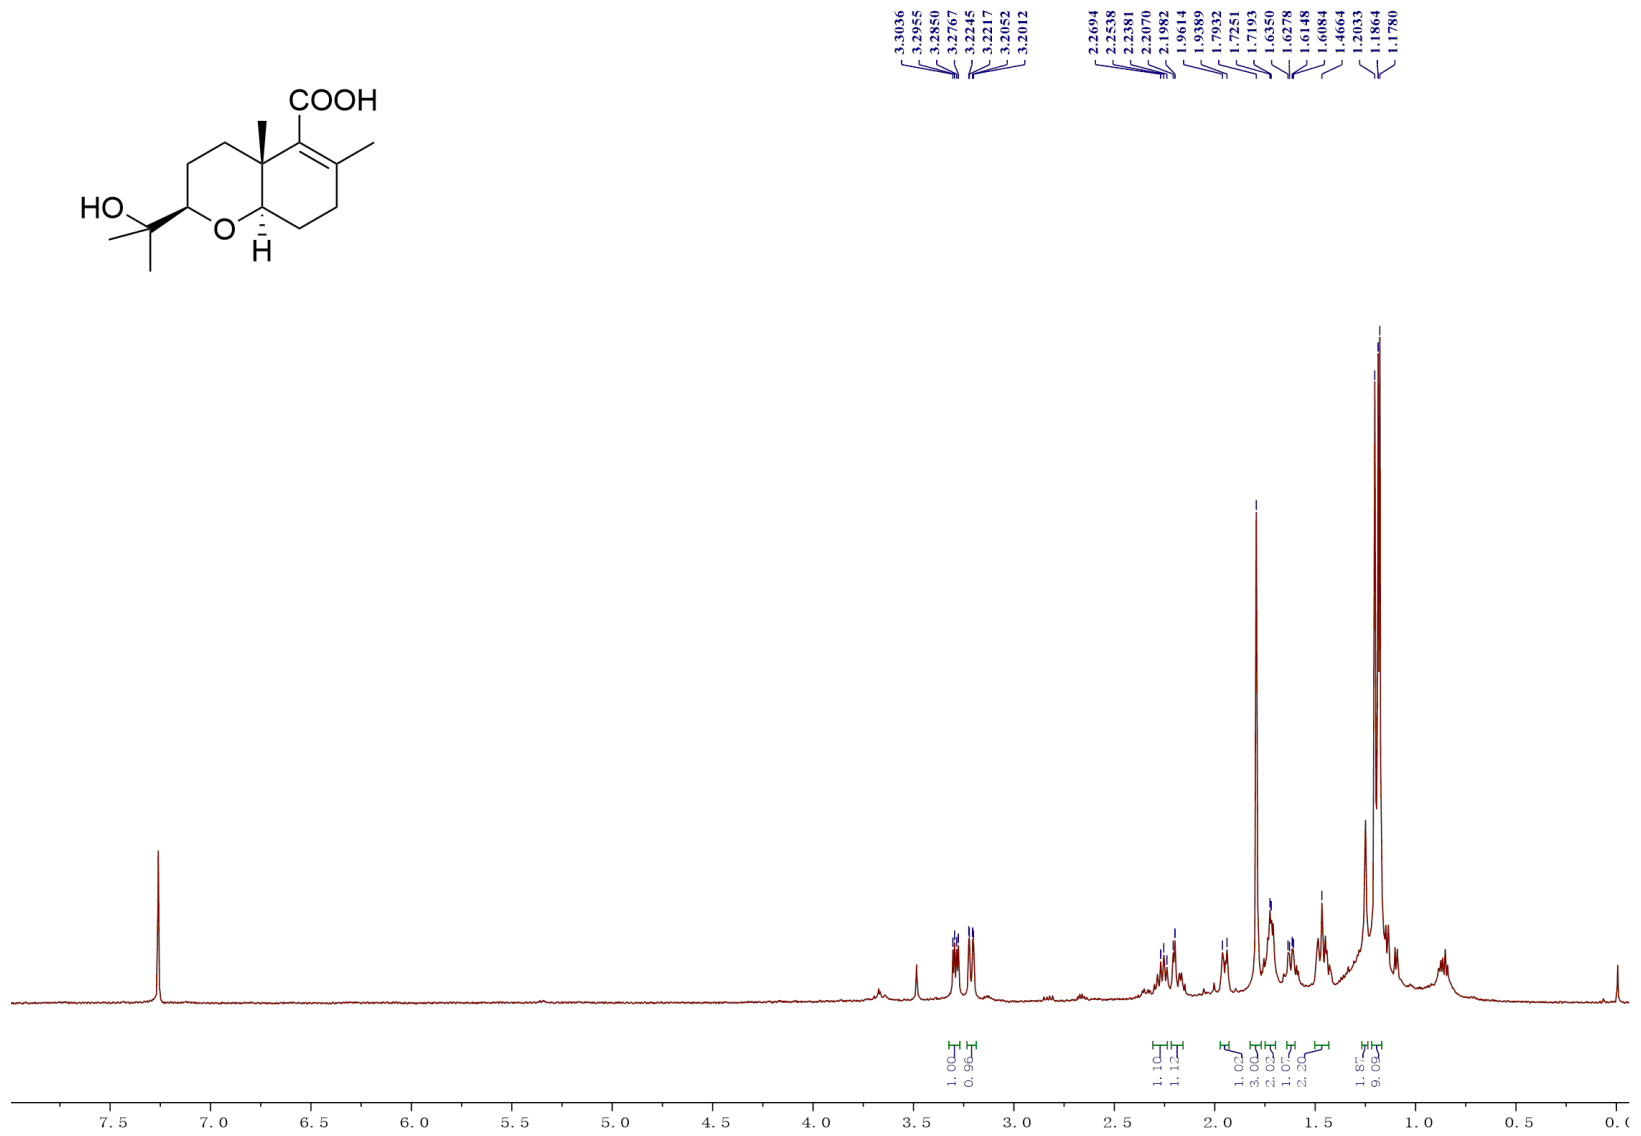

**Fig. S36.** <sup>1</sup>H NMR spectrum (CDCl<sub>3</sub>, 400 MHz) of **6**

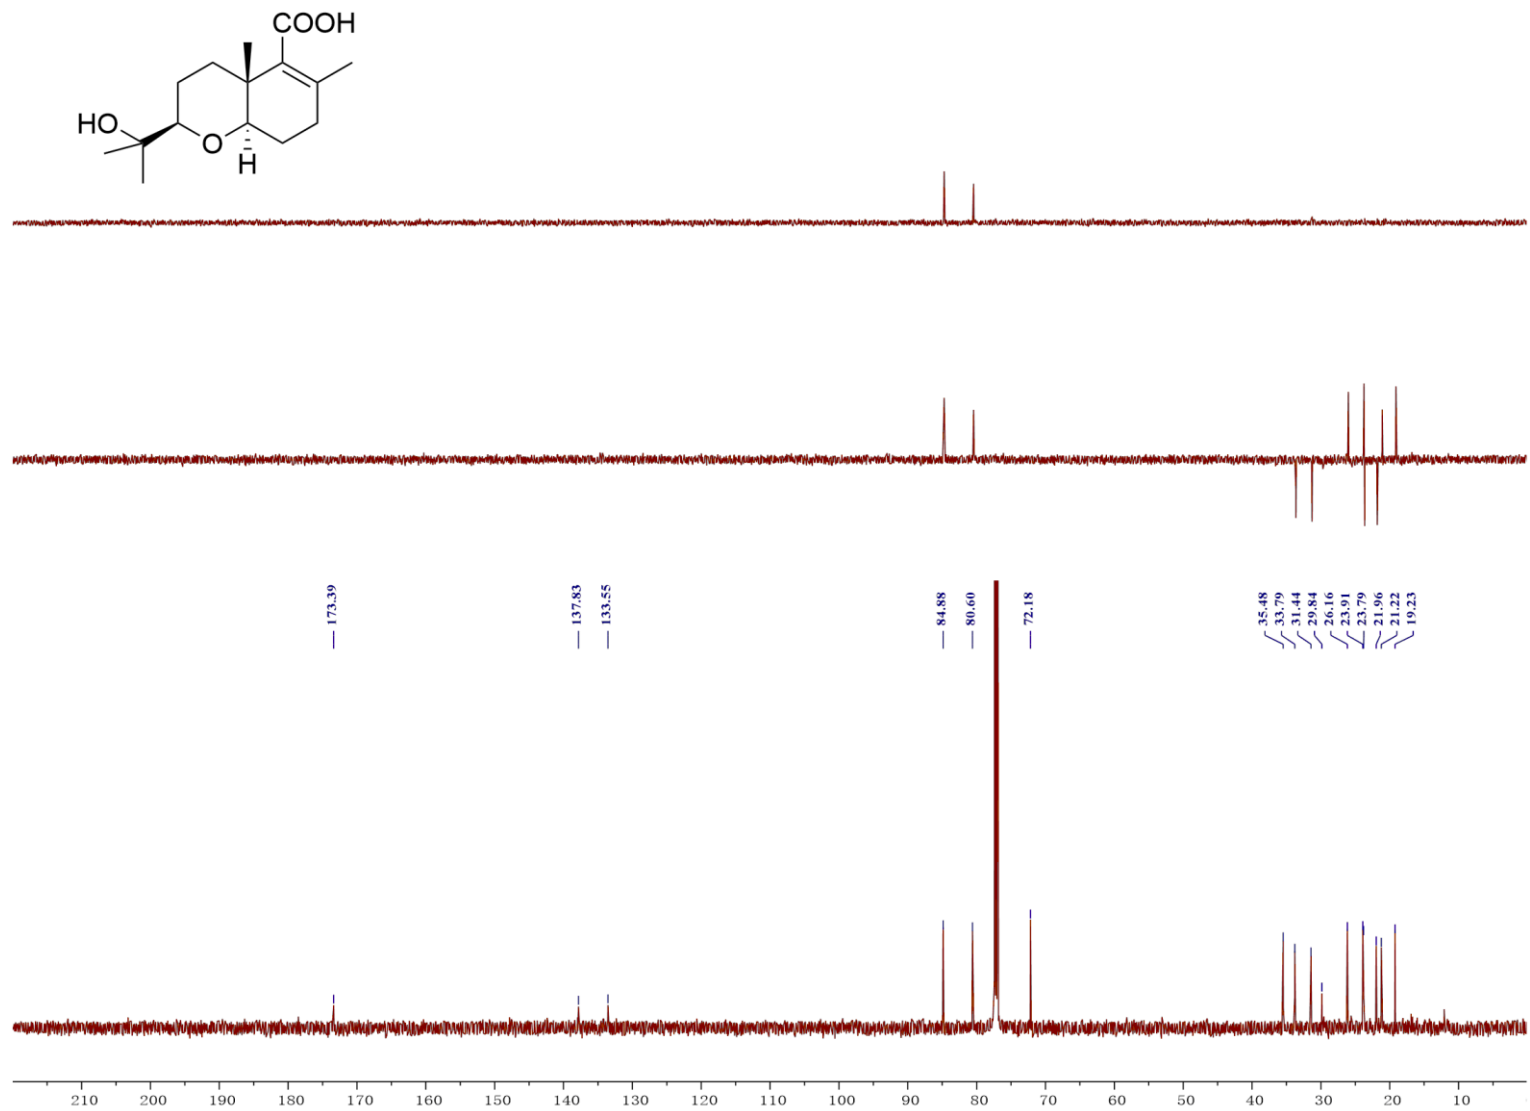

Fig. S37.  $^{13}\text{C}$  and DEPT spectra ( $\text{CDCl}_3$ , 100 MHz) of 6

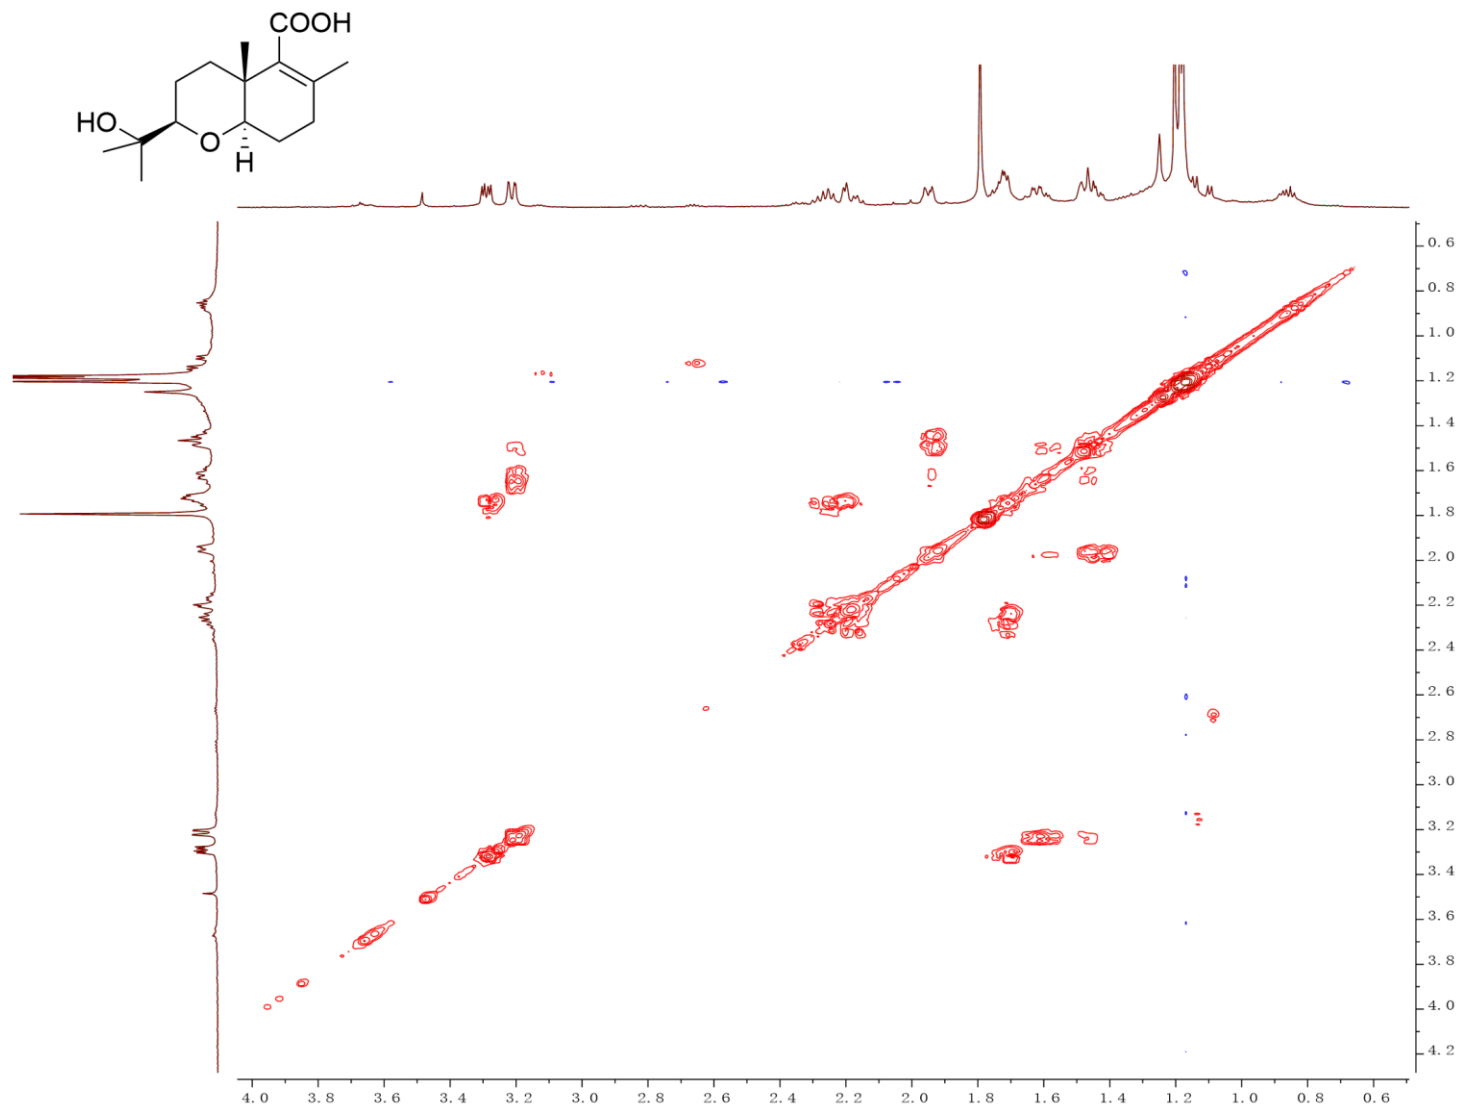

**Fig. S38.**  $^1\text{H}$ - $^1\text{H}$  COSY spectrum ( $\text{CDCl}_3$ , 400 MHz) of **6**

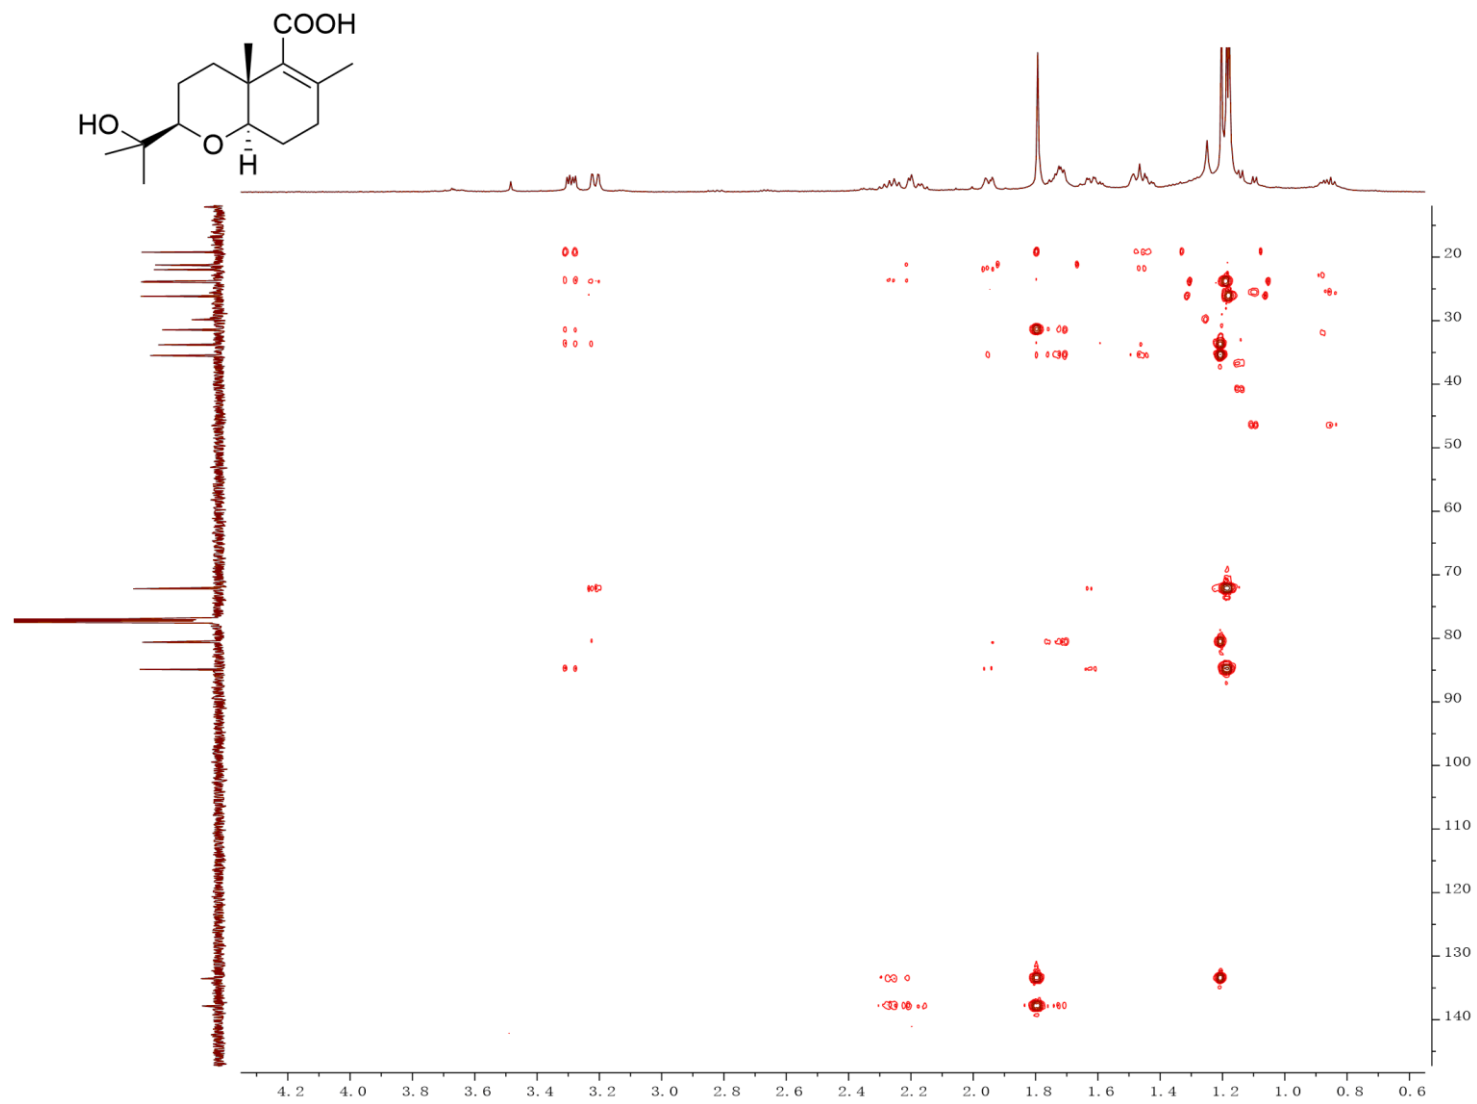

**Fig. S39.** HMBC spectrum (CDCl<sub>3</sub>, 400 MHz) of **6**

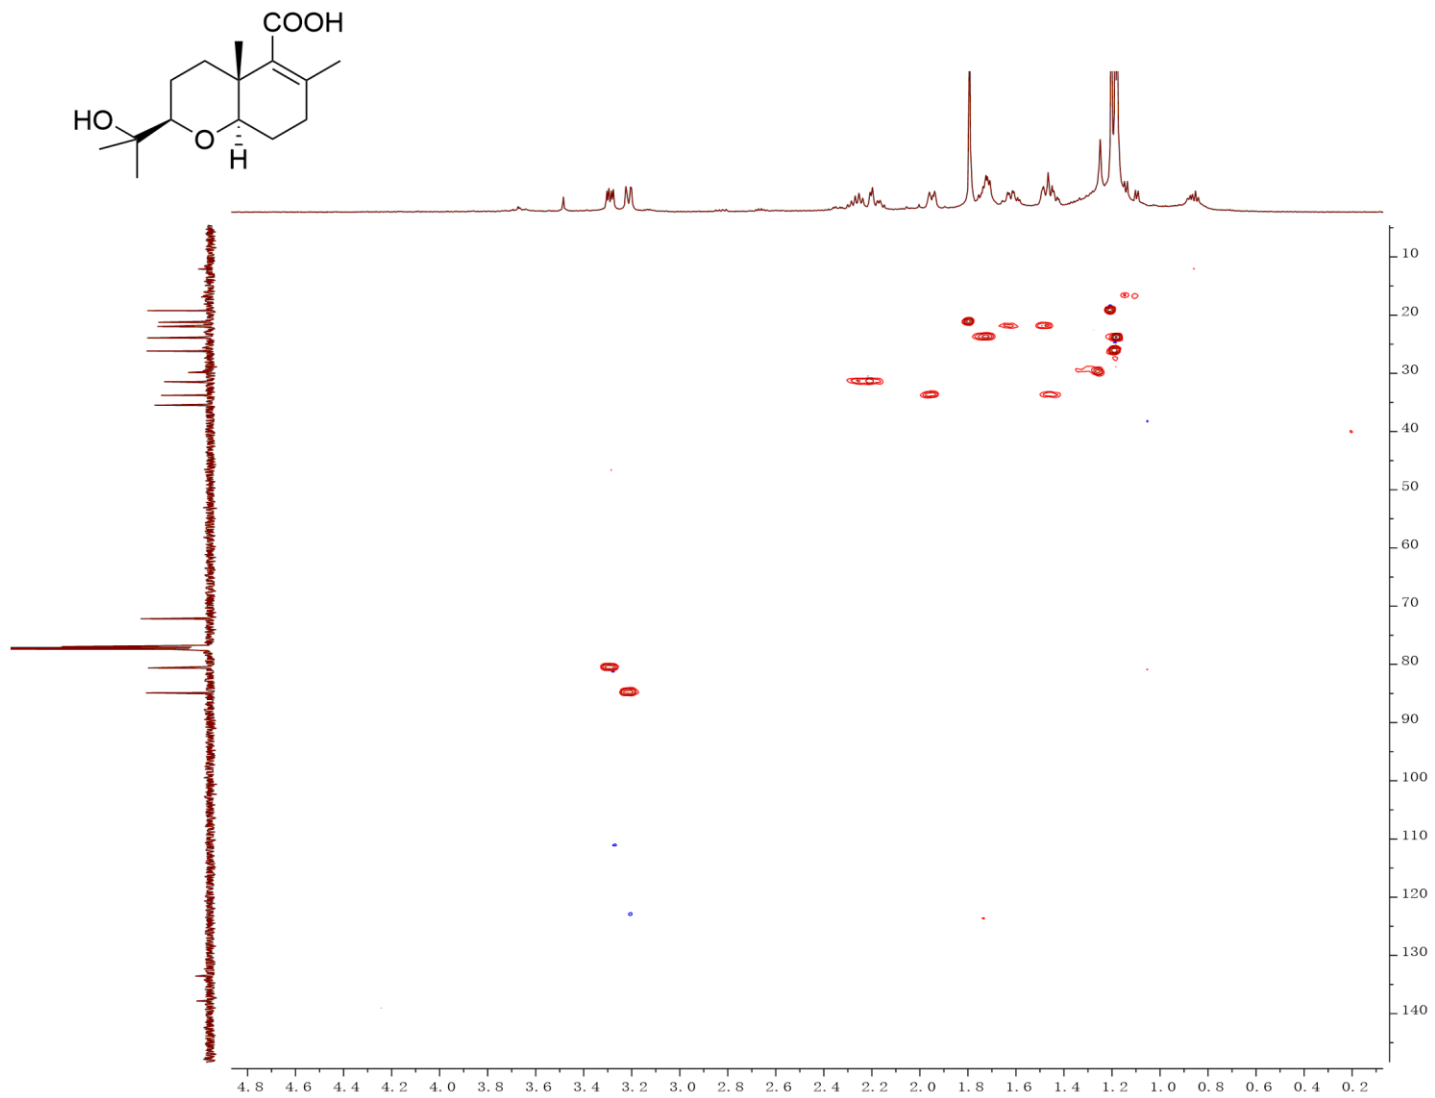

**Fig. S40.** HSQC spectrum (CDCl<sub>3</sub>, 400 MHz) of **6**

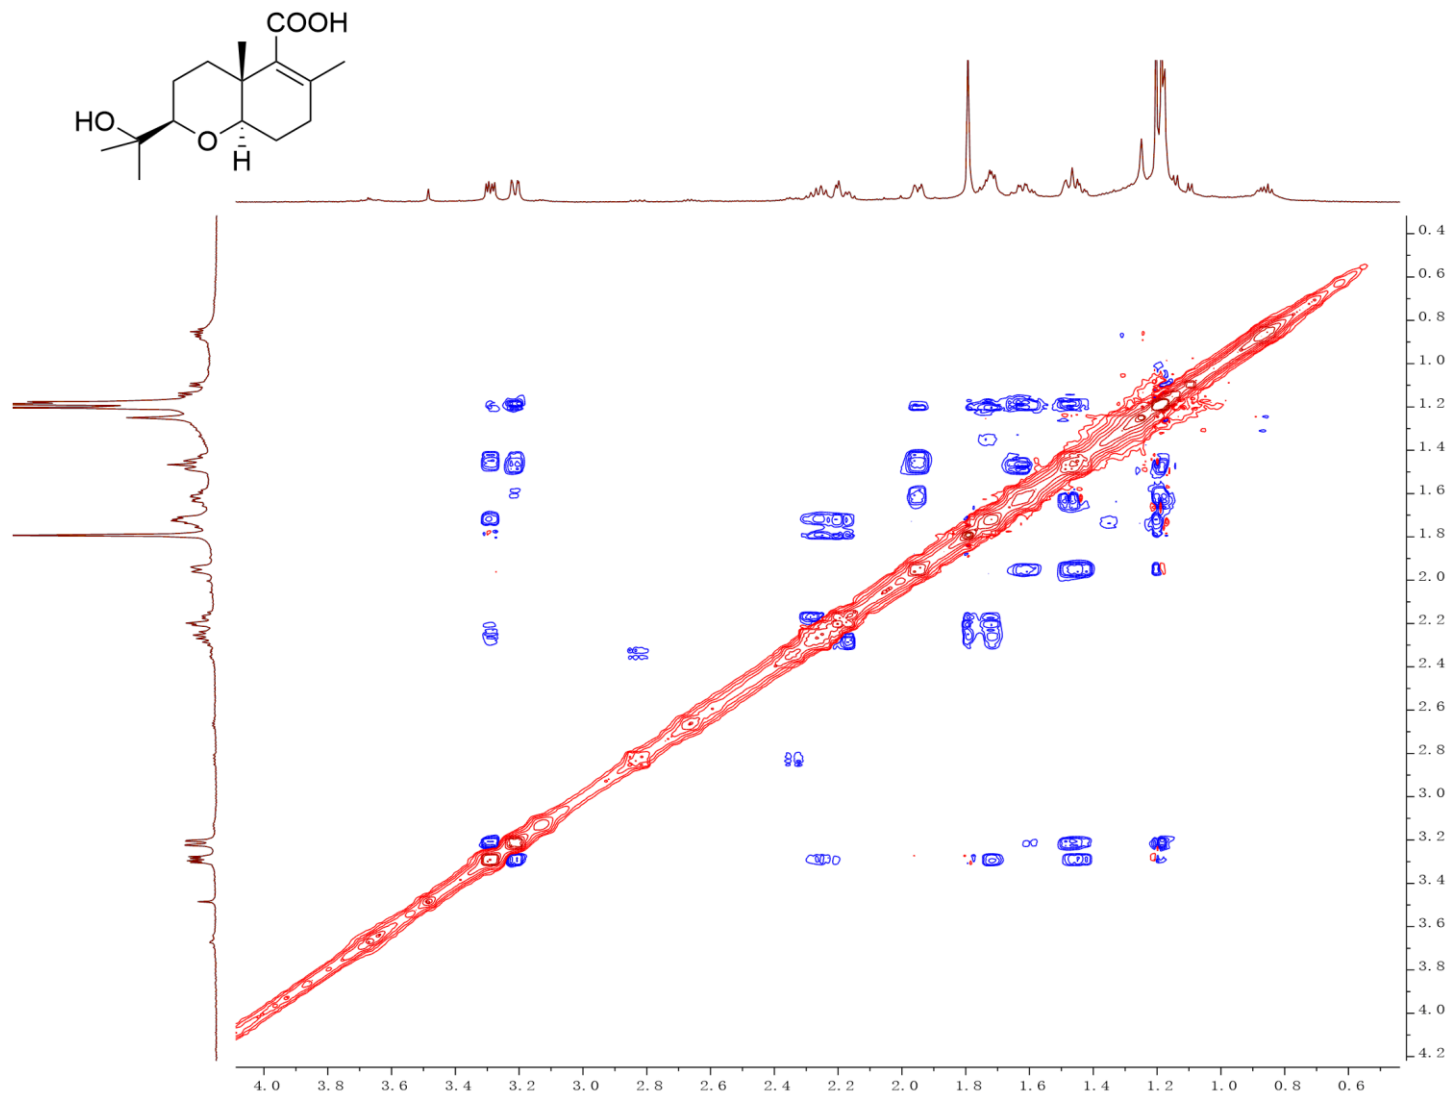

**Fig. S41.** NOESY spectrum (CDCl<sub>3</sub>, 400 MHz) of **6**



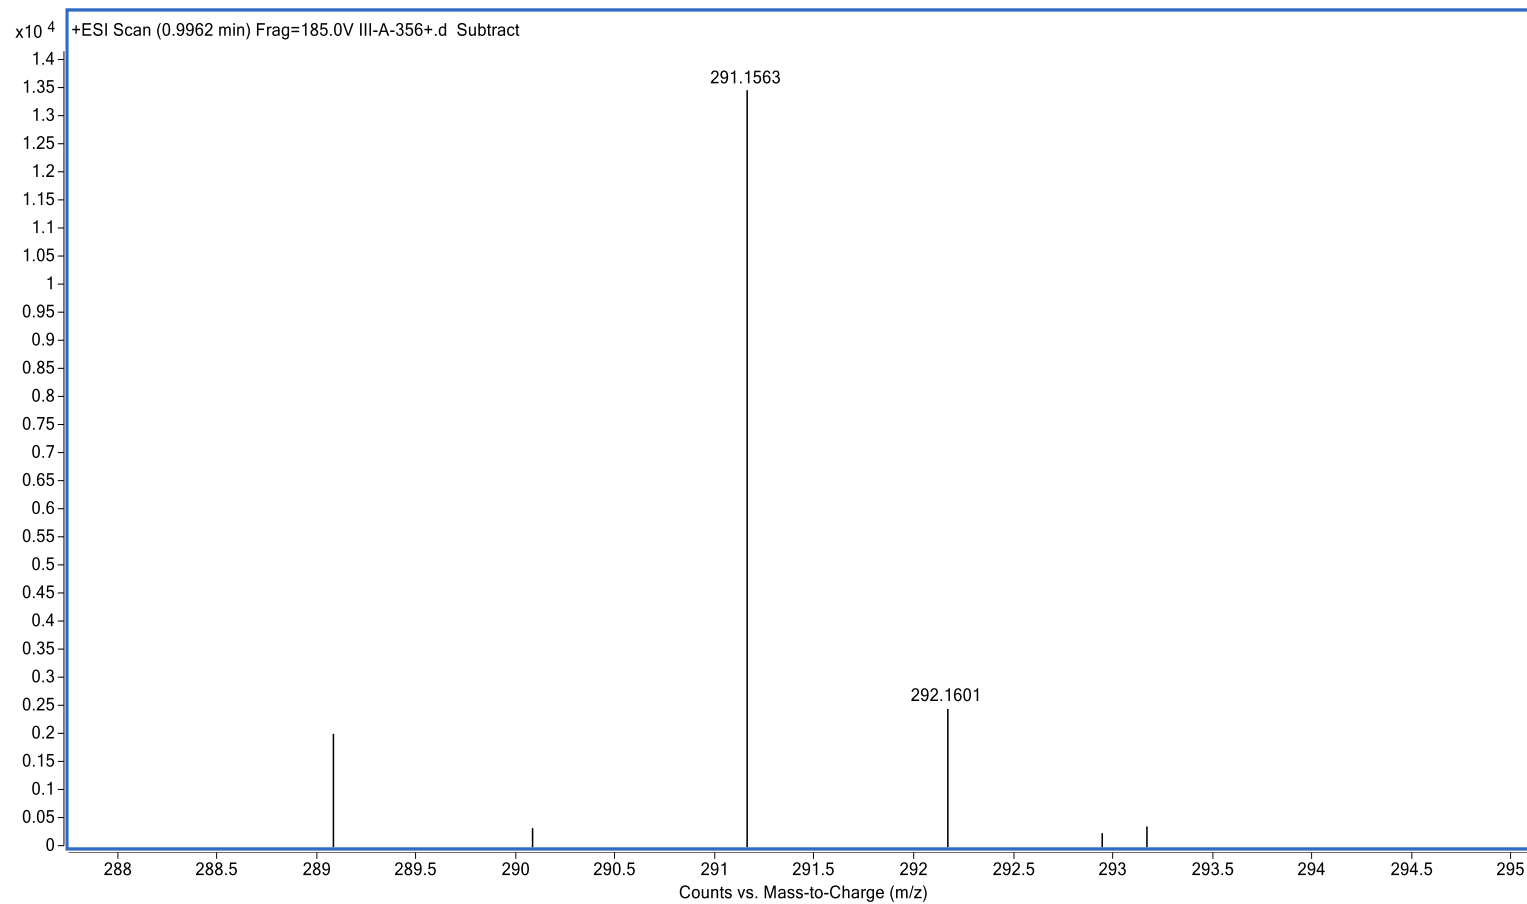

**Fig. S42.** (+)-HR-ESI-MS (positive mode) of **6**

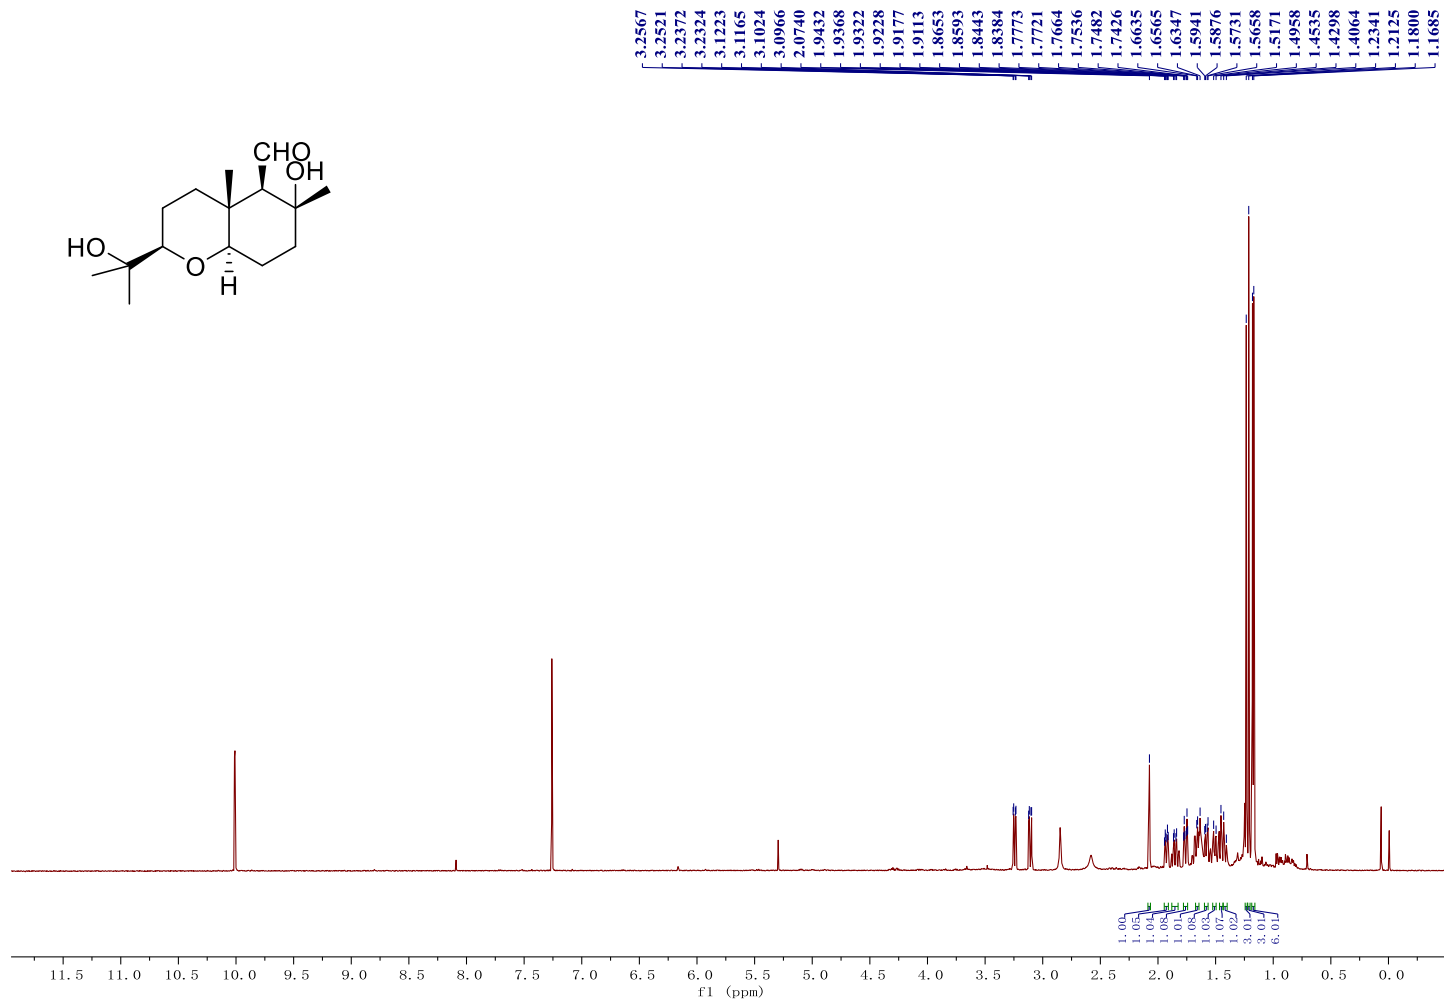

**Fig. S43.**  $^1\text{H}$  NMR spectrum ( $\text{CDCl}_3$ , 600 MHz) of **7**

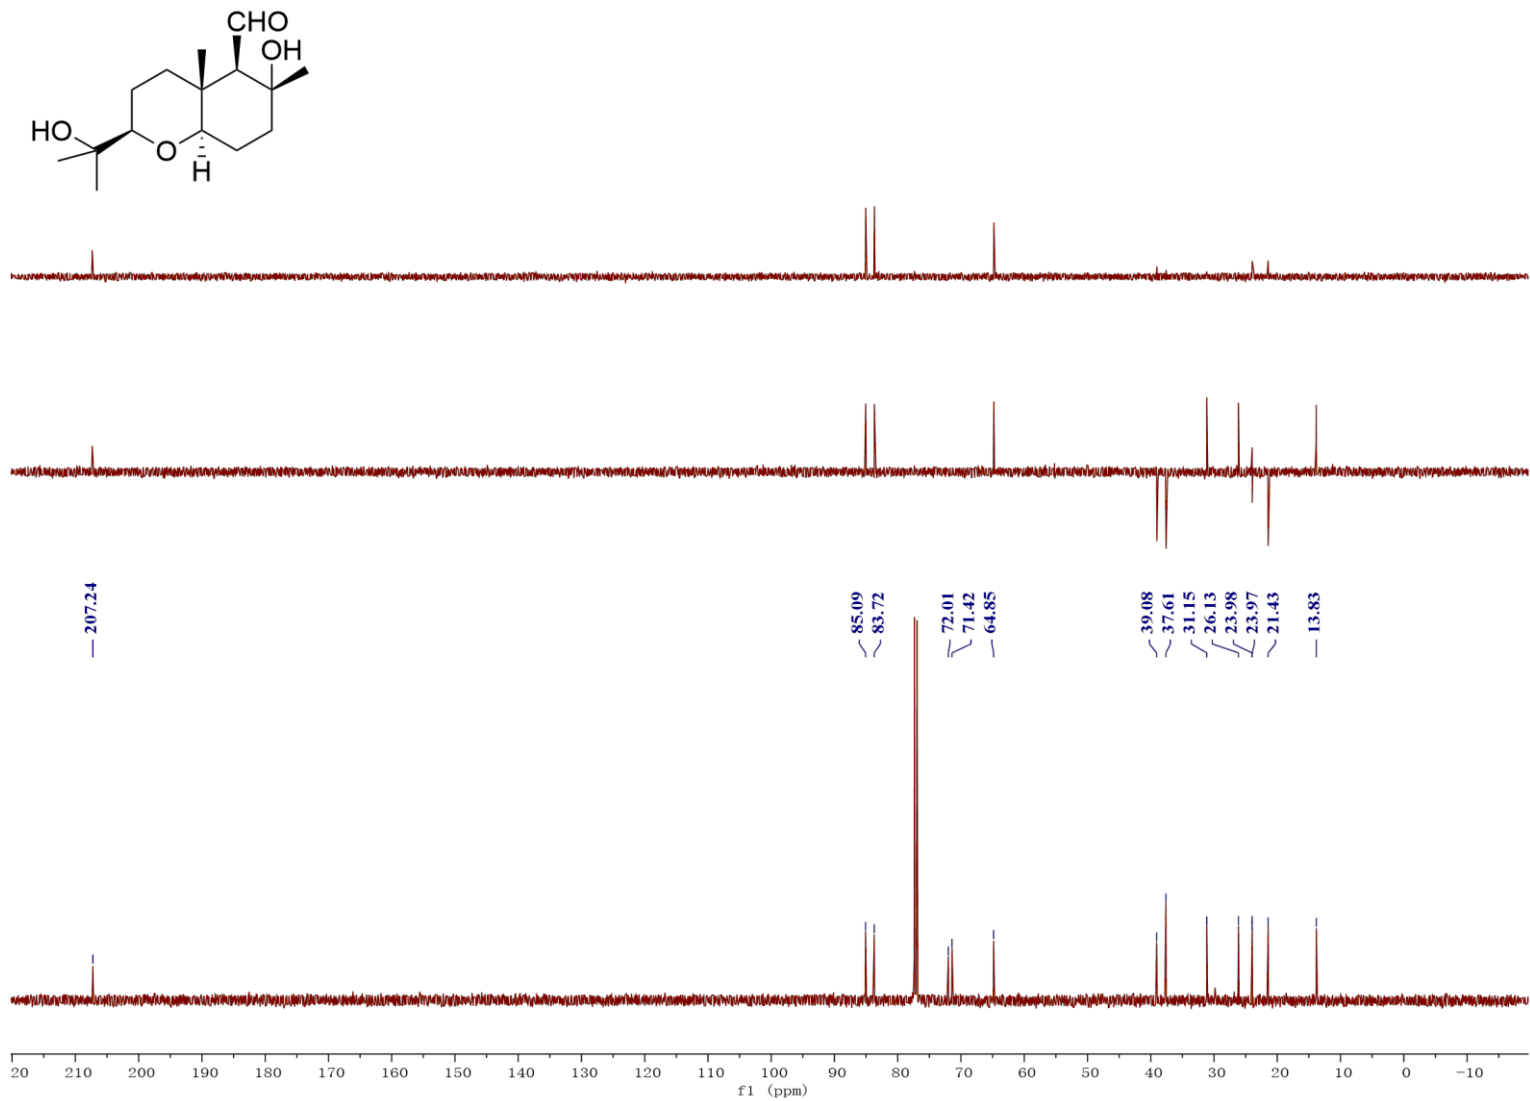

Fig. S44.  $^{13}\text{C}$  and DEPT spectra ( $\text{CDCl}_3$ , 150 MHz) of 7

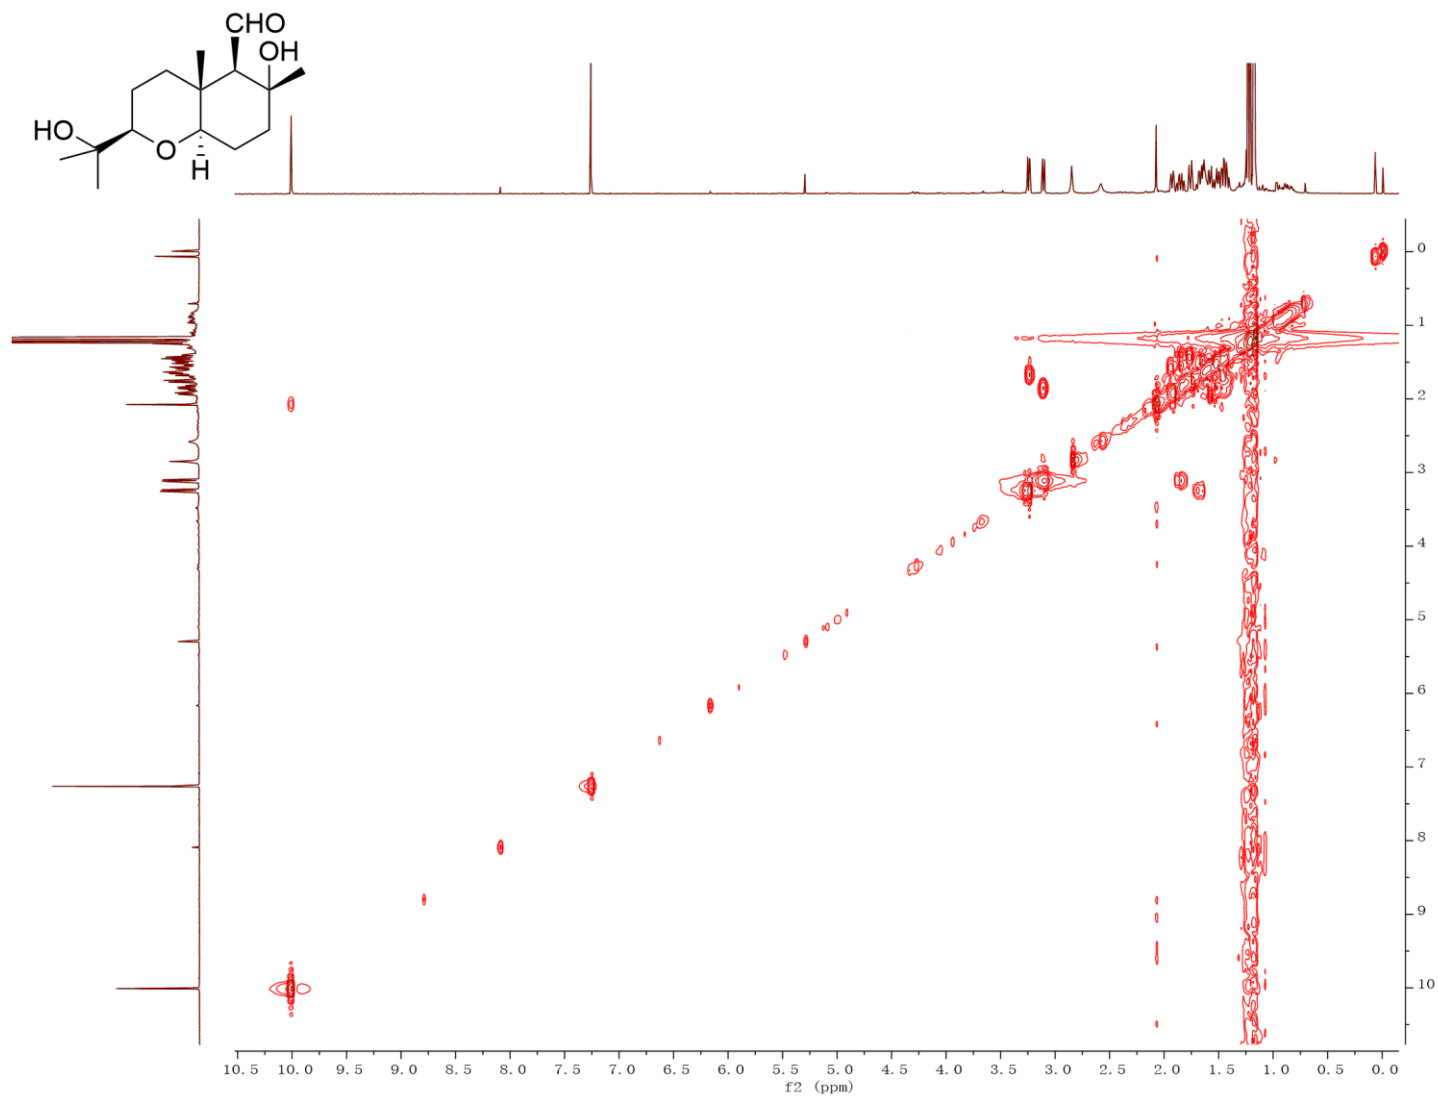

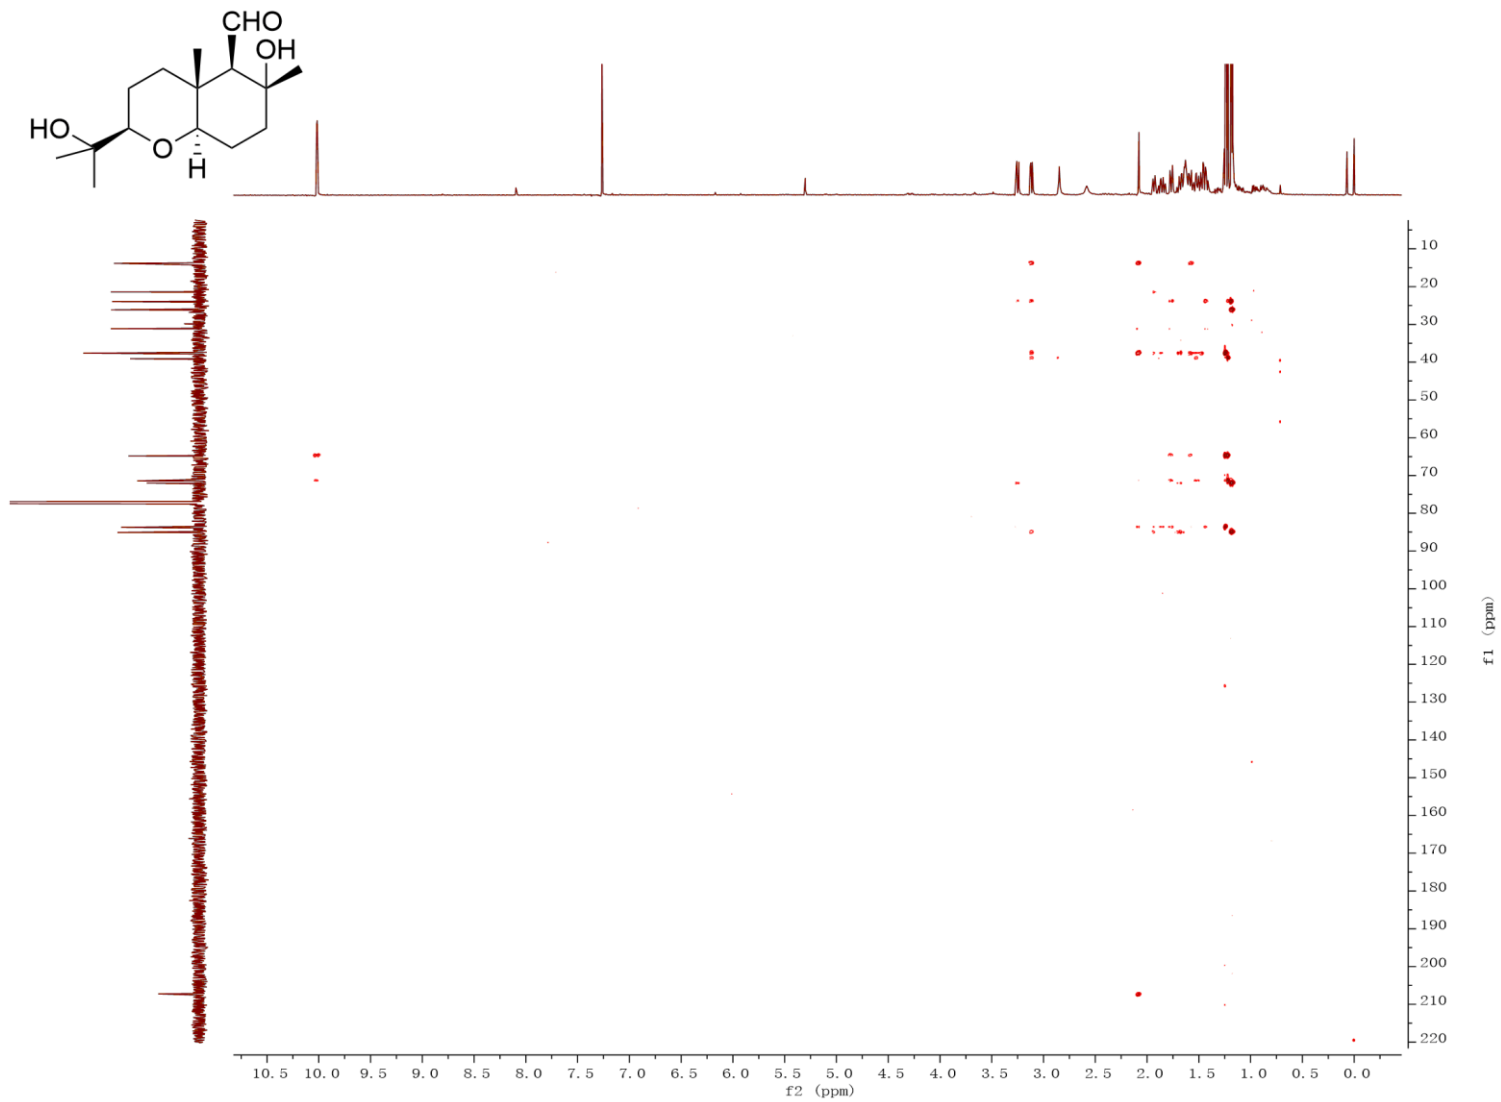

**Fig. S46.** HMBC spectrum (CDCl<sub>3</sub>, 600 MHz) of **7**

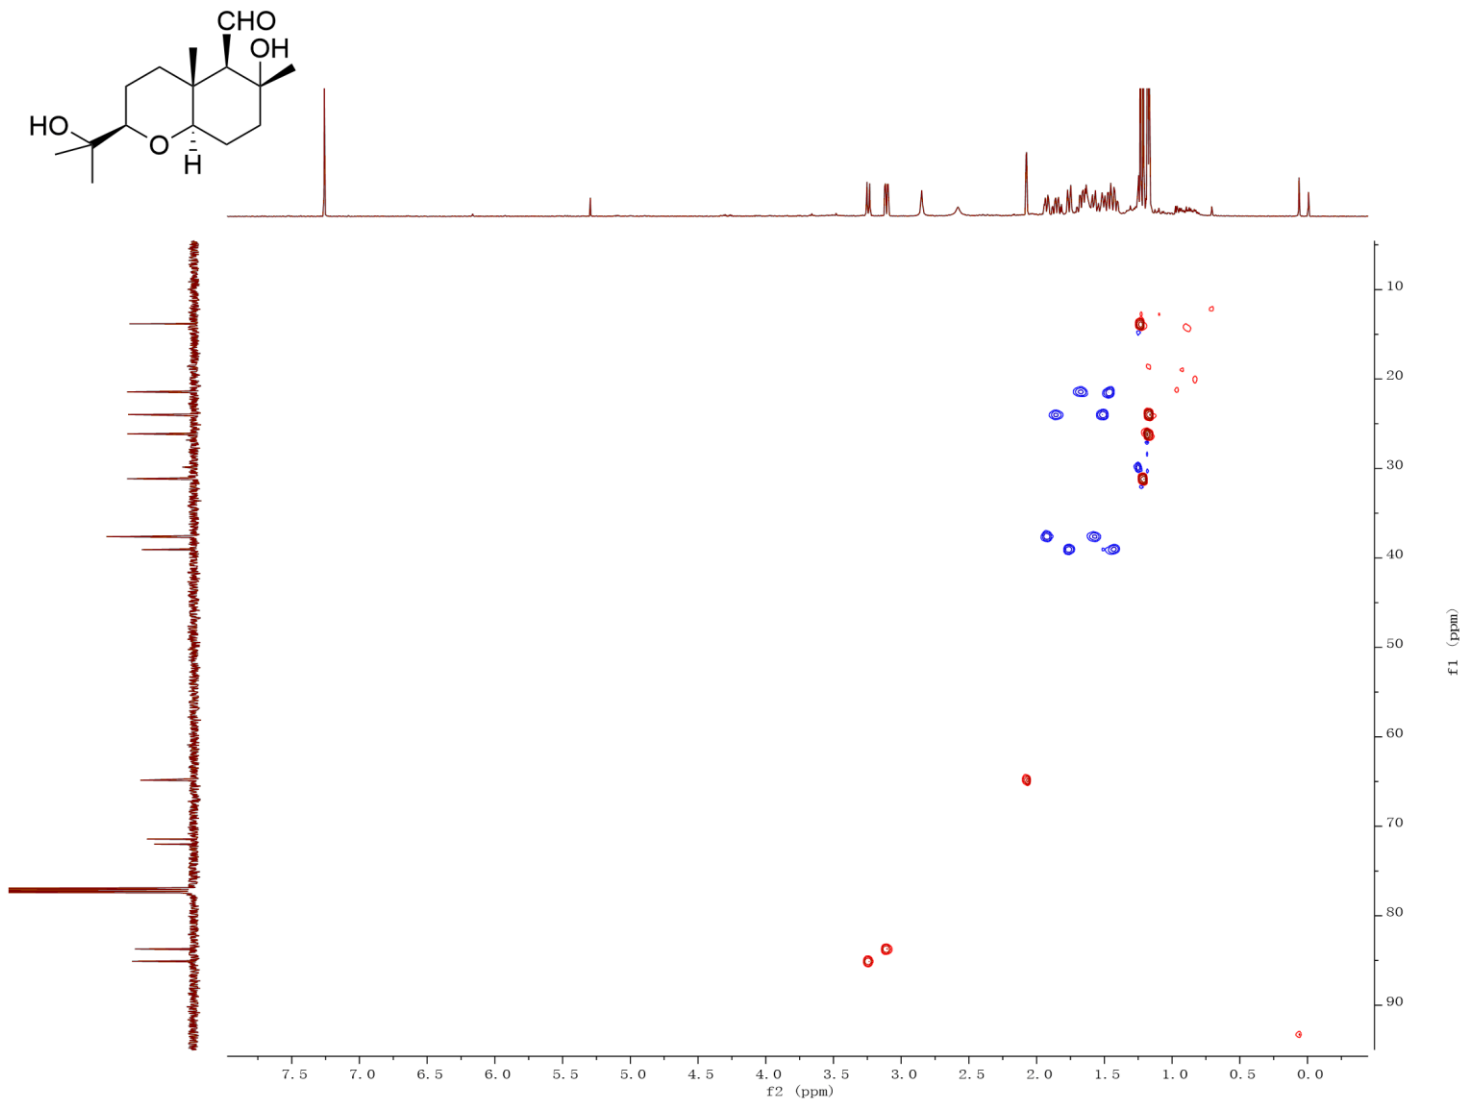

**Fig. S47.** HSQC spectrum (CDCl<sub>3</sub>, 600 MHz) of **7**

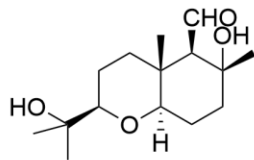

YUNNAN UNIVERSITY ASCEND AVIIIHD600 1323A  
Sep20-2022-shuyan  
ROESY CDCl<sub>3</sub>

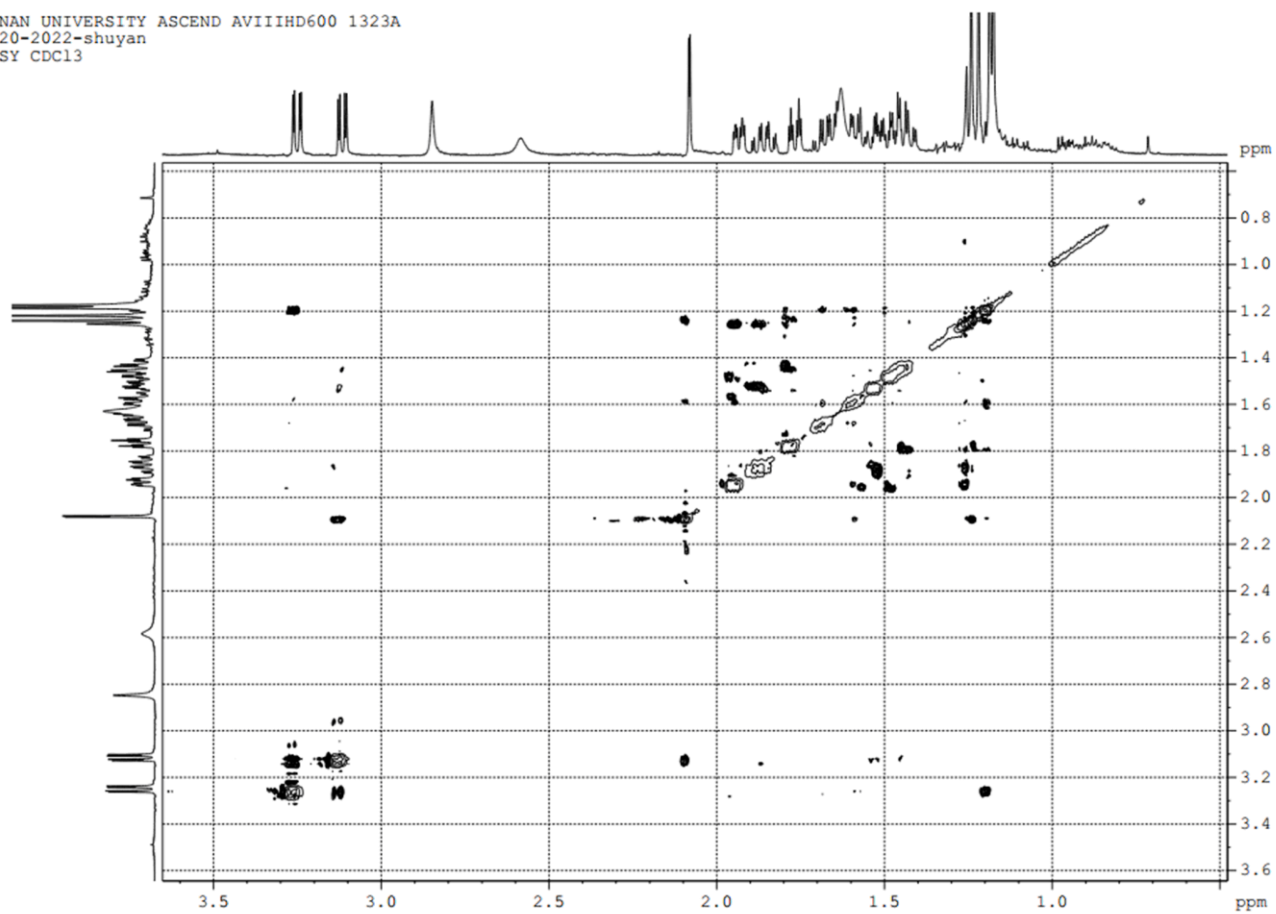

**Fig. S48.** ROESY spectrum (CDCl<sub>3</sub>, 600 MHz) of **7**

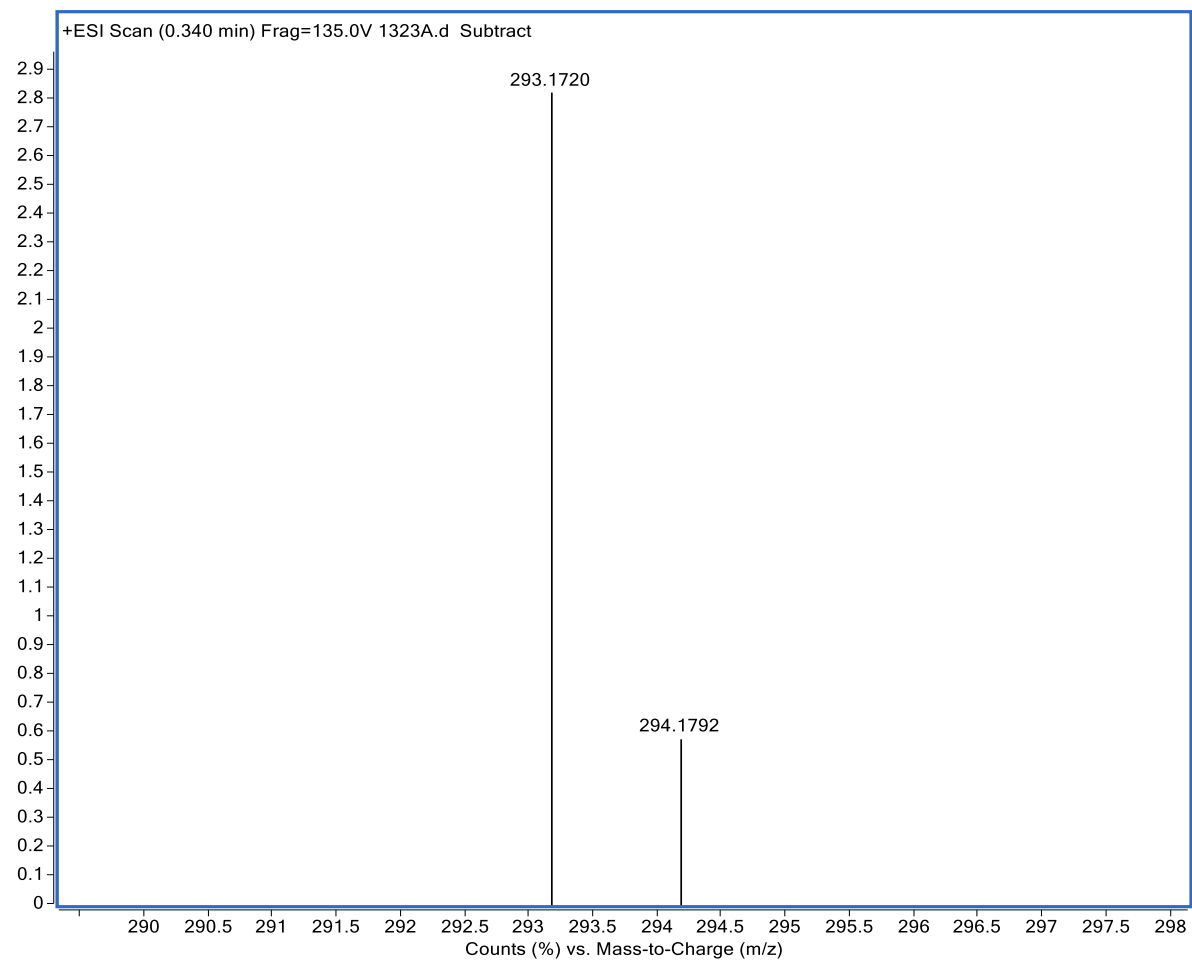

**Fig. S49.** (+)-HR-ESI-MS (positive mode) of **7**



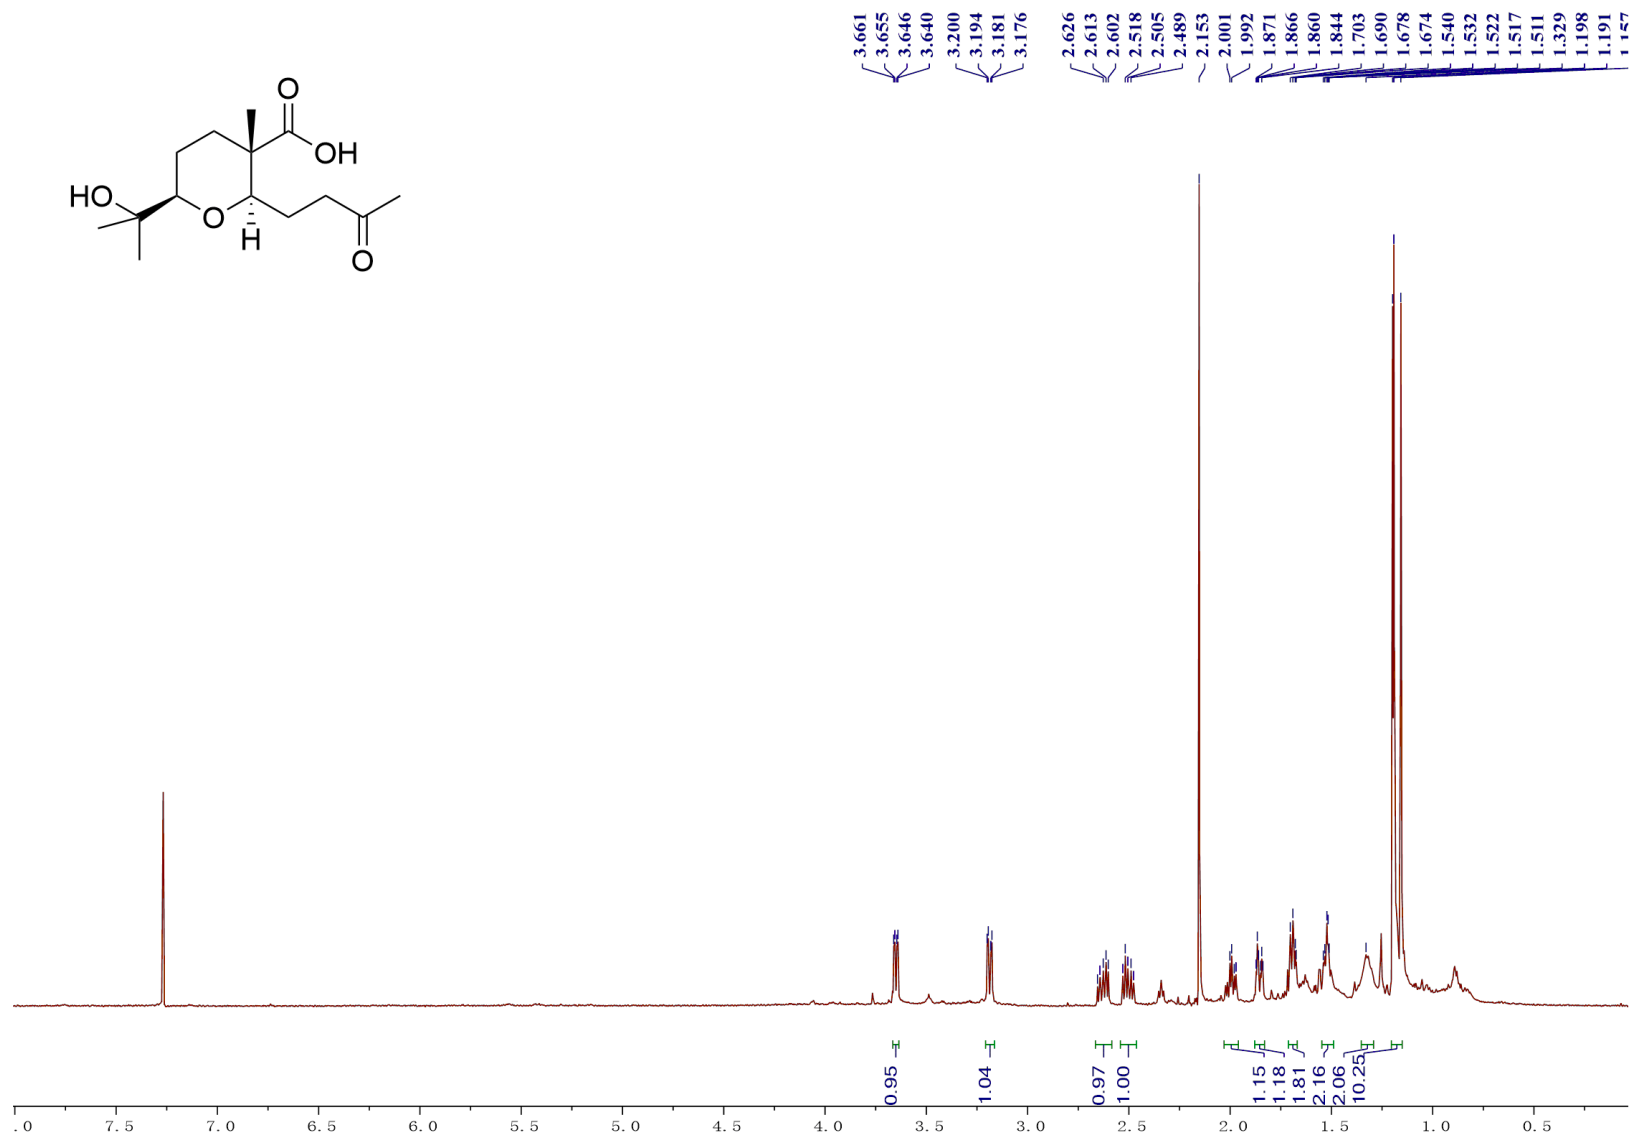

**Fig. S50.**  $^1\text{H}$  NMR spectrum (CDCl<sub>3</sub>, 600 MHz) of **8**

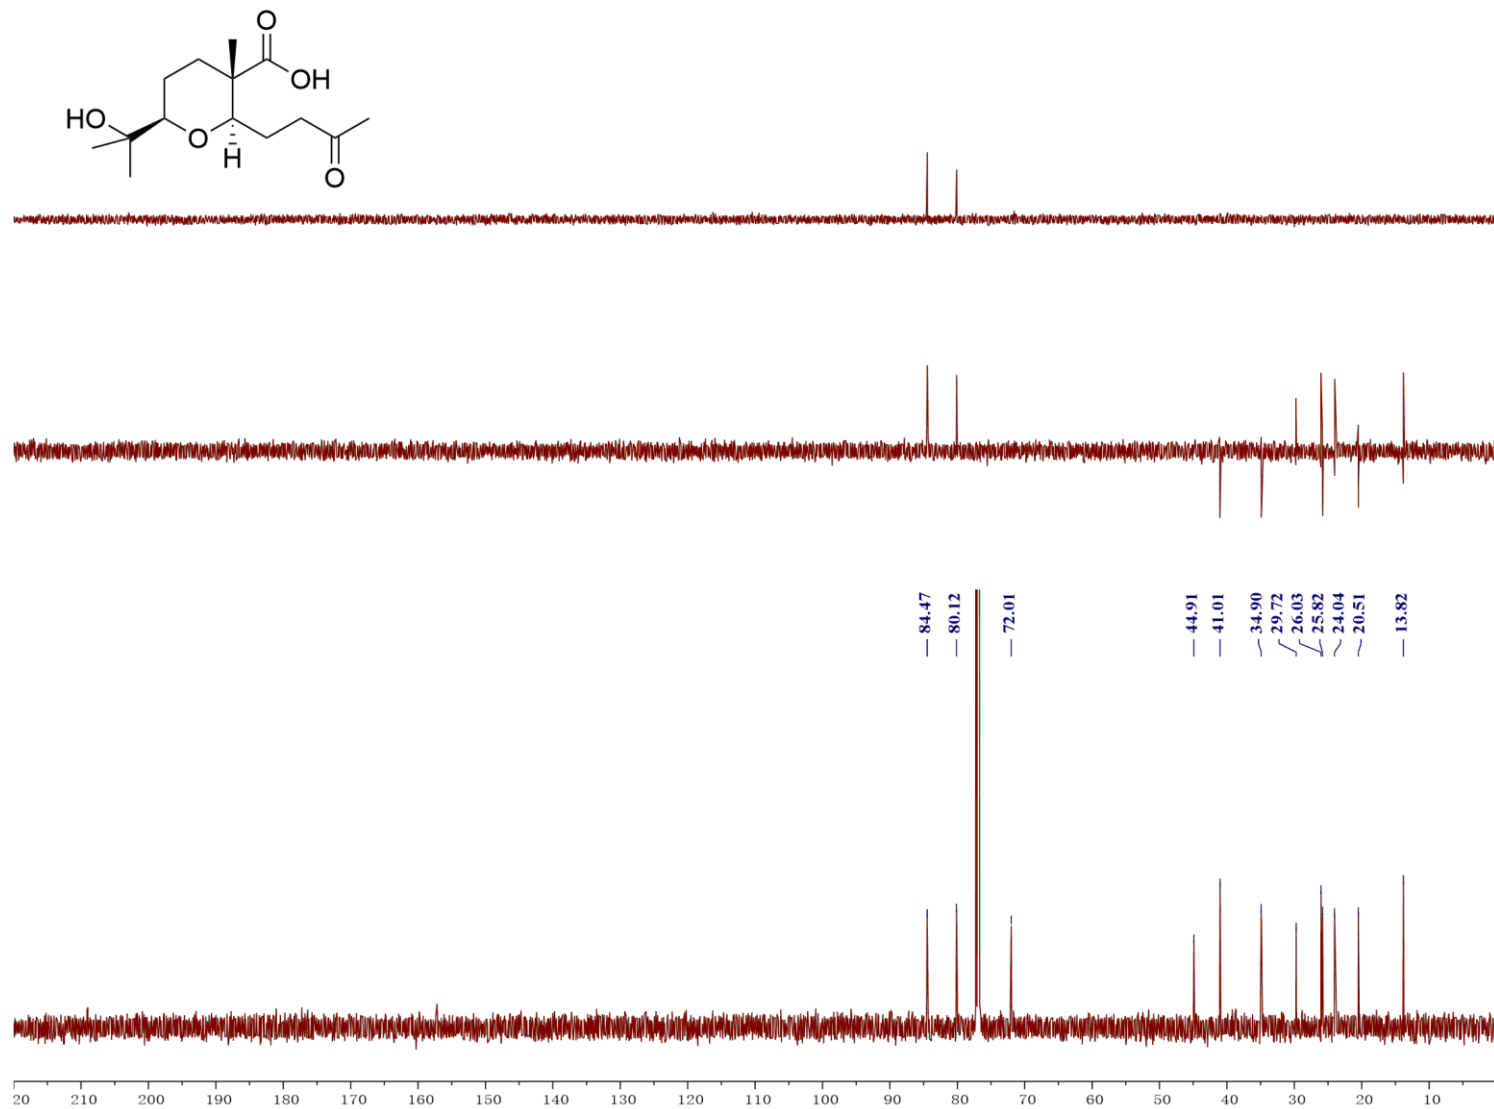

**Fig. S51.**  $^{13}\text{C}$  and DEPT spectra ( $\text{CDCl}_3$ , 150 MHz) of **8**

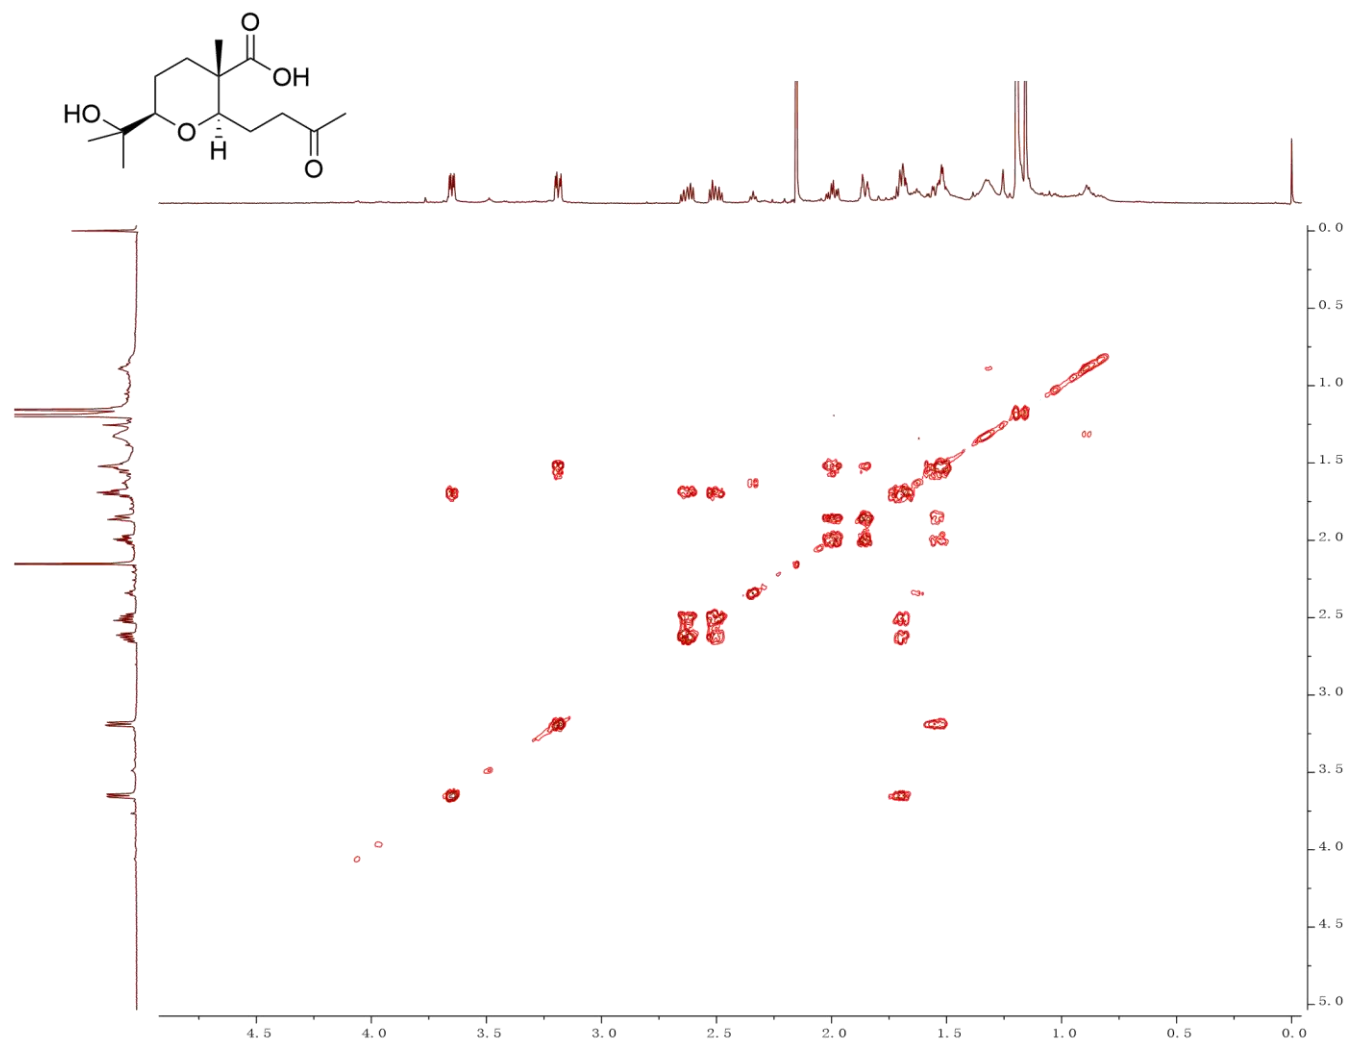

**Fig. S52.**  $^1\text{H}$ - $^1\text{H}$  COSY spectrum ( $\text{CDCl}_3$ , 600 MHz) of **8**

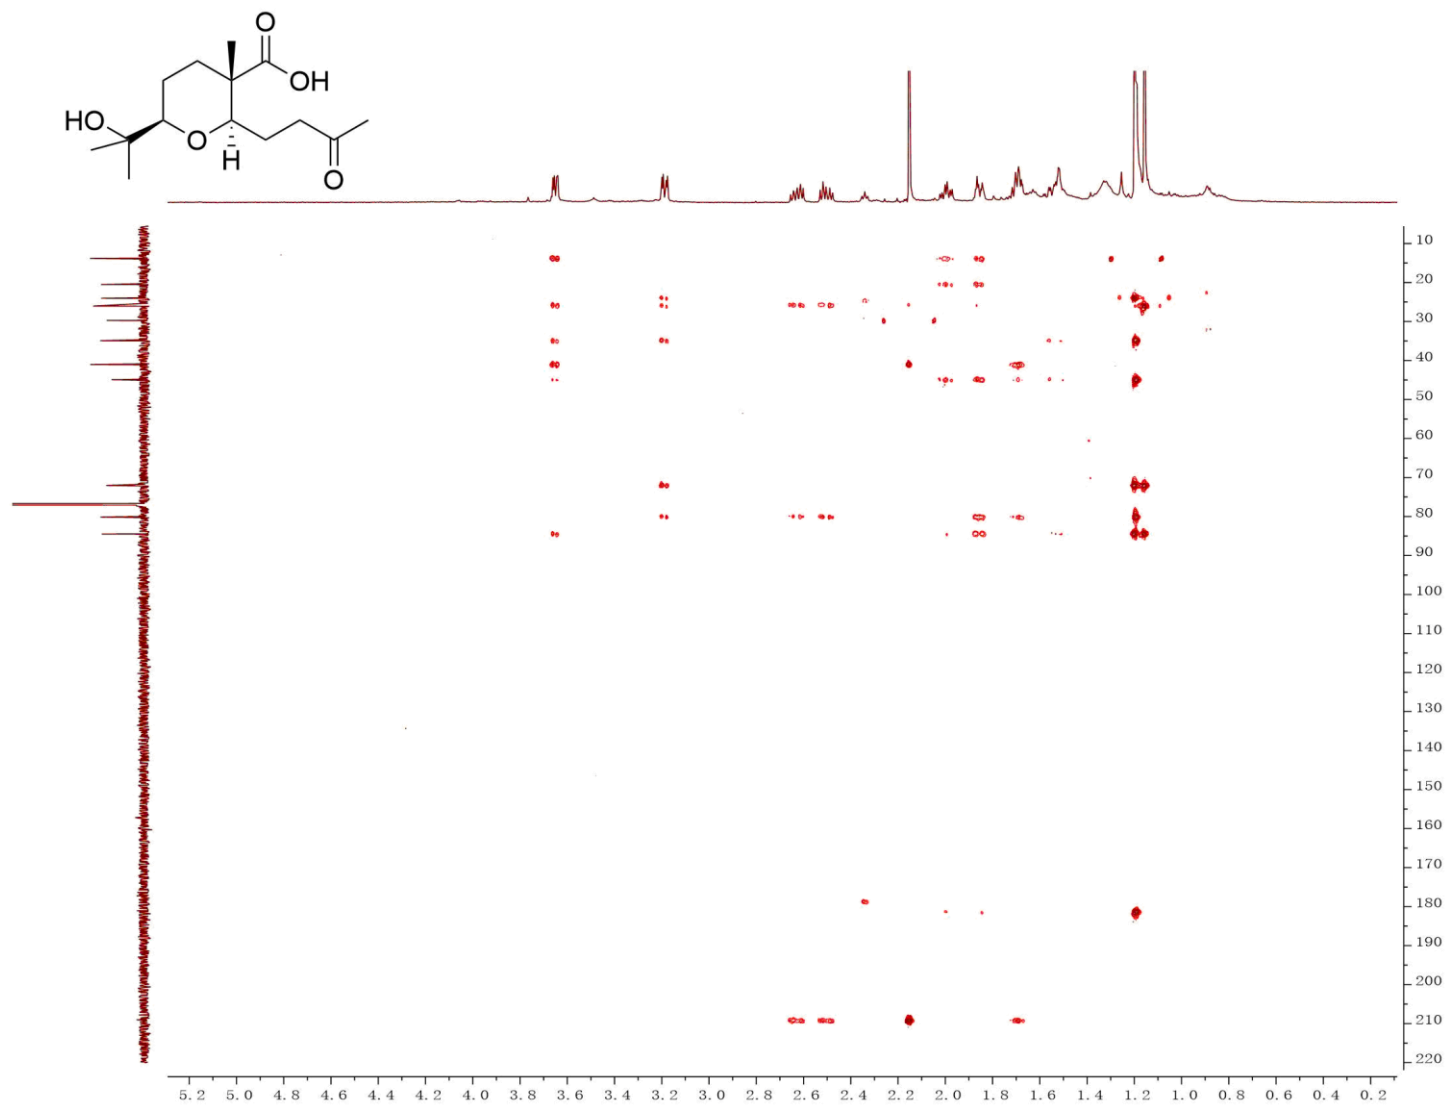

**Fig. S53.** HMBC spectrum (CDCl<sub>3</sub>, 600 MHz) of **8**

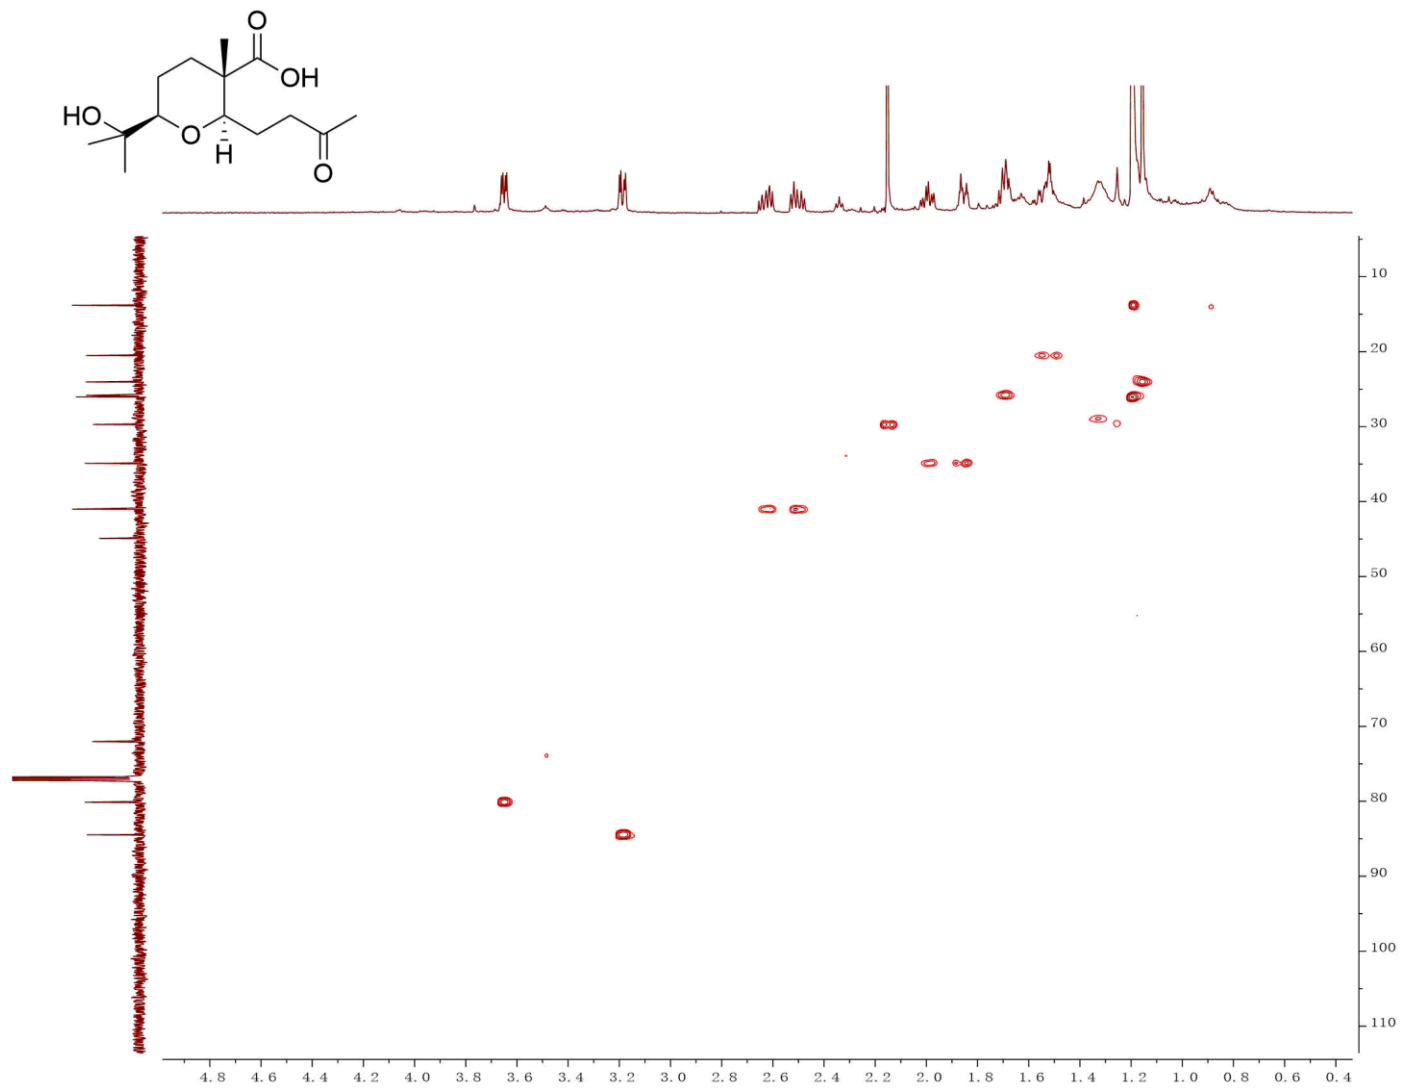

**Fig. S54.** HSQC spectrum (CDCl<sub>3</sub>, 600 MHz) of **8**

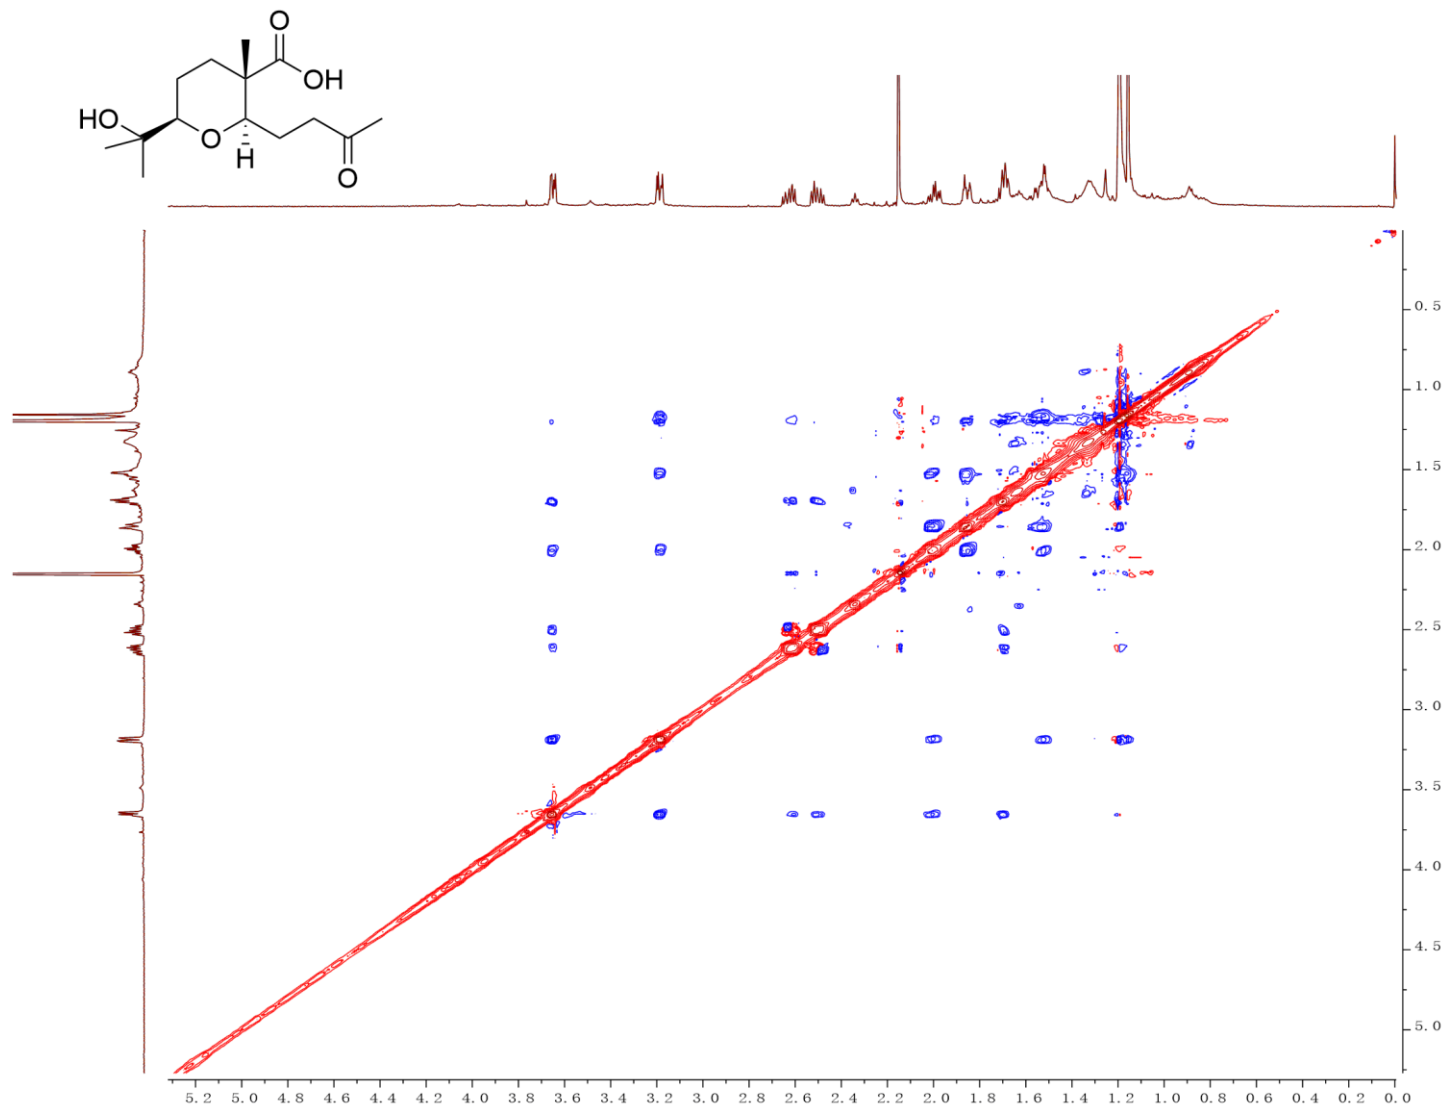

**Fig. S55.** NOESY spectrum (CDCl<sub>3</sub>, 600 MHz) of **8**

DJ1-4-2 #42 RT: 0.91 AV: 1 NL: 4.21E7  
T: FTMS + c ESI Full ms [100.00-850.00]

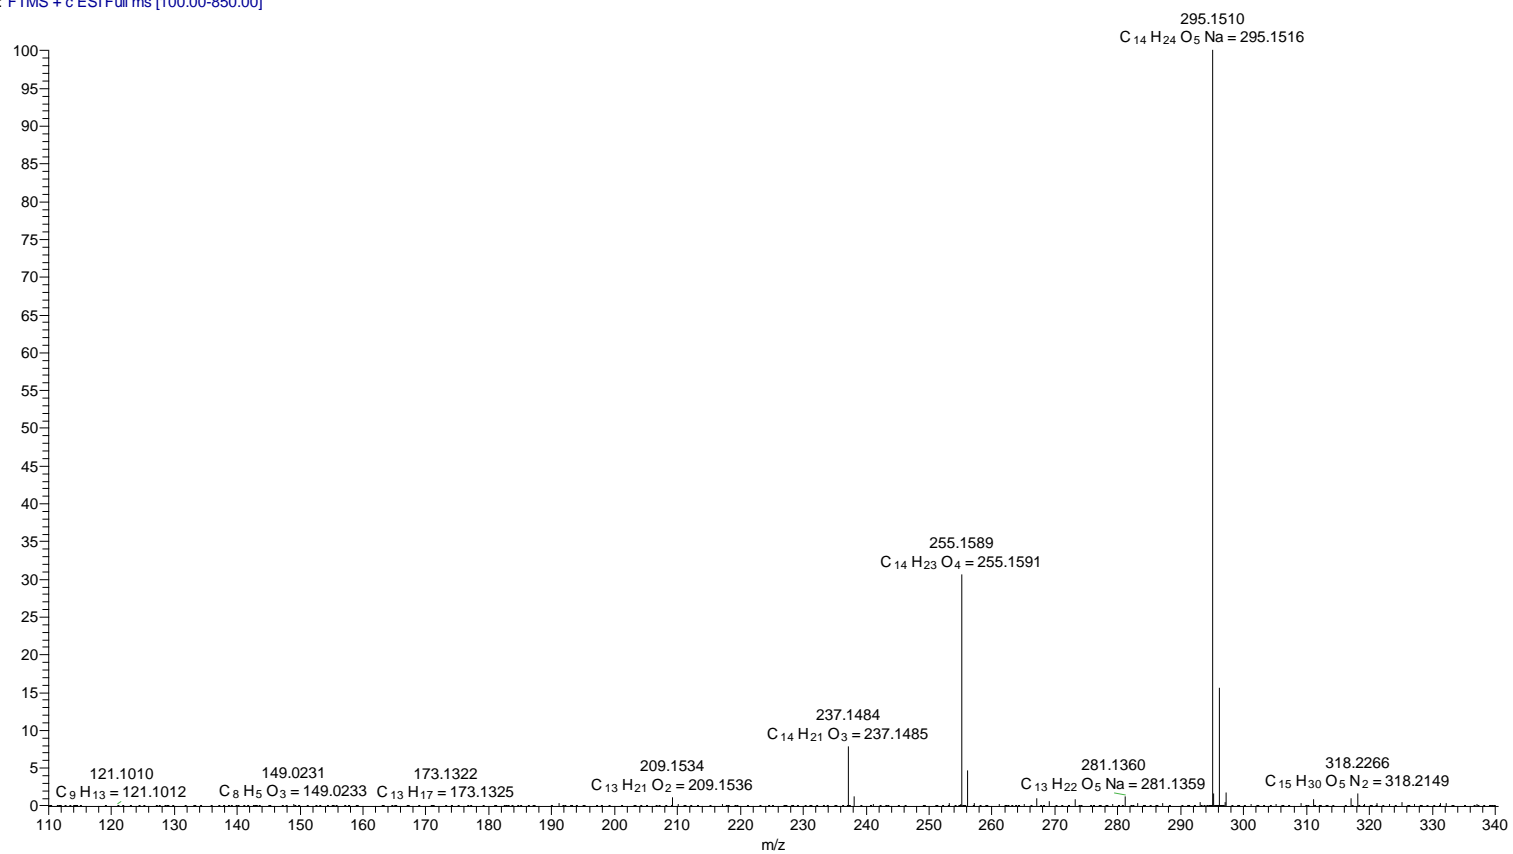

**Fig. S56.** (+)-HR-ESI-MS (positive mode) of **8**

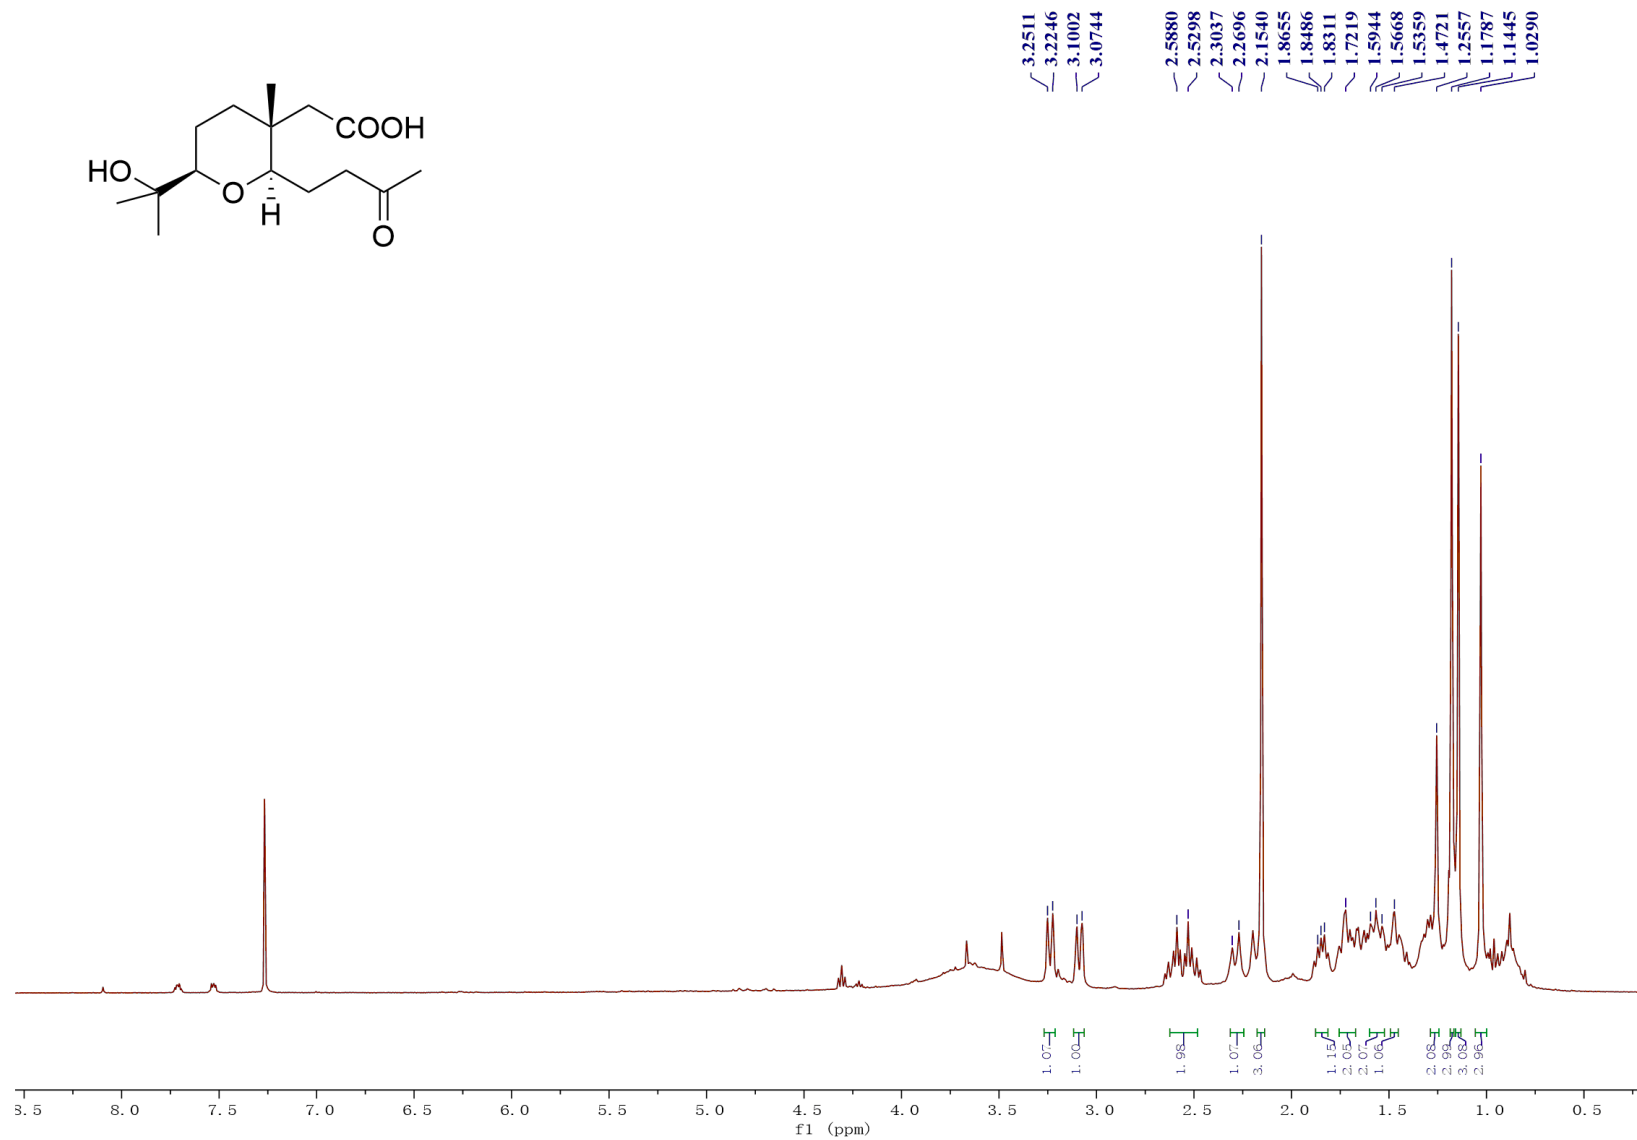

**Fig. S57.** <sup>1</sup>H NMR spectrum (CDCl<sub>3</sub>, 600 MHz) of **9**



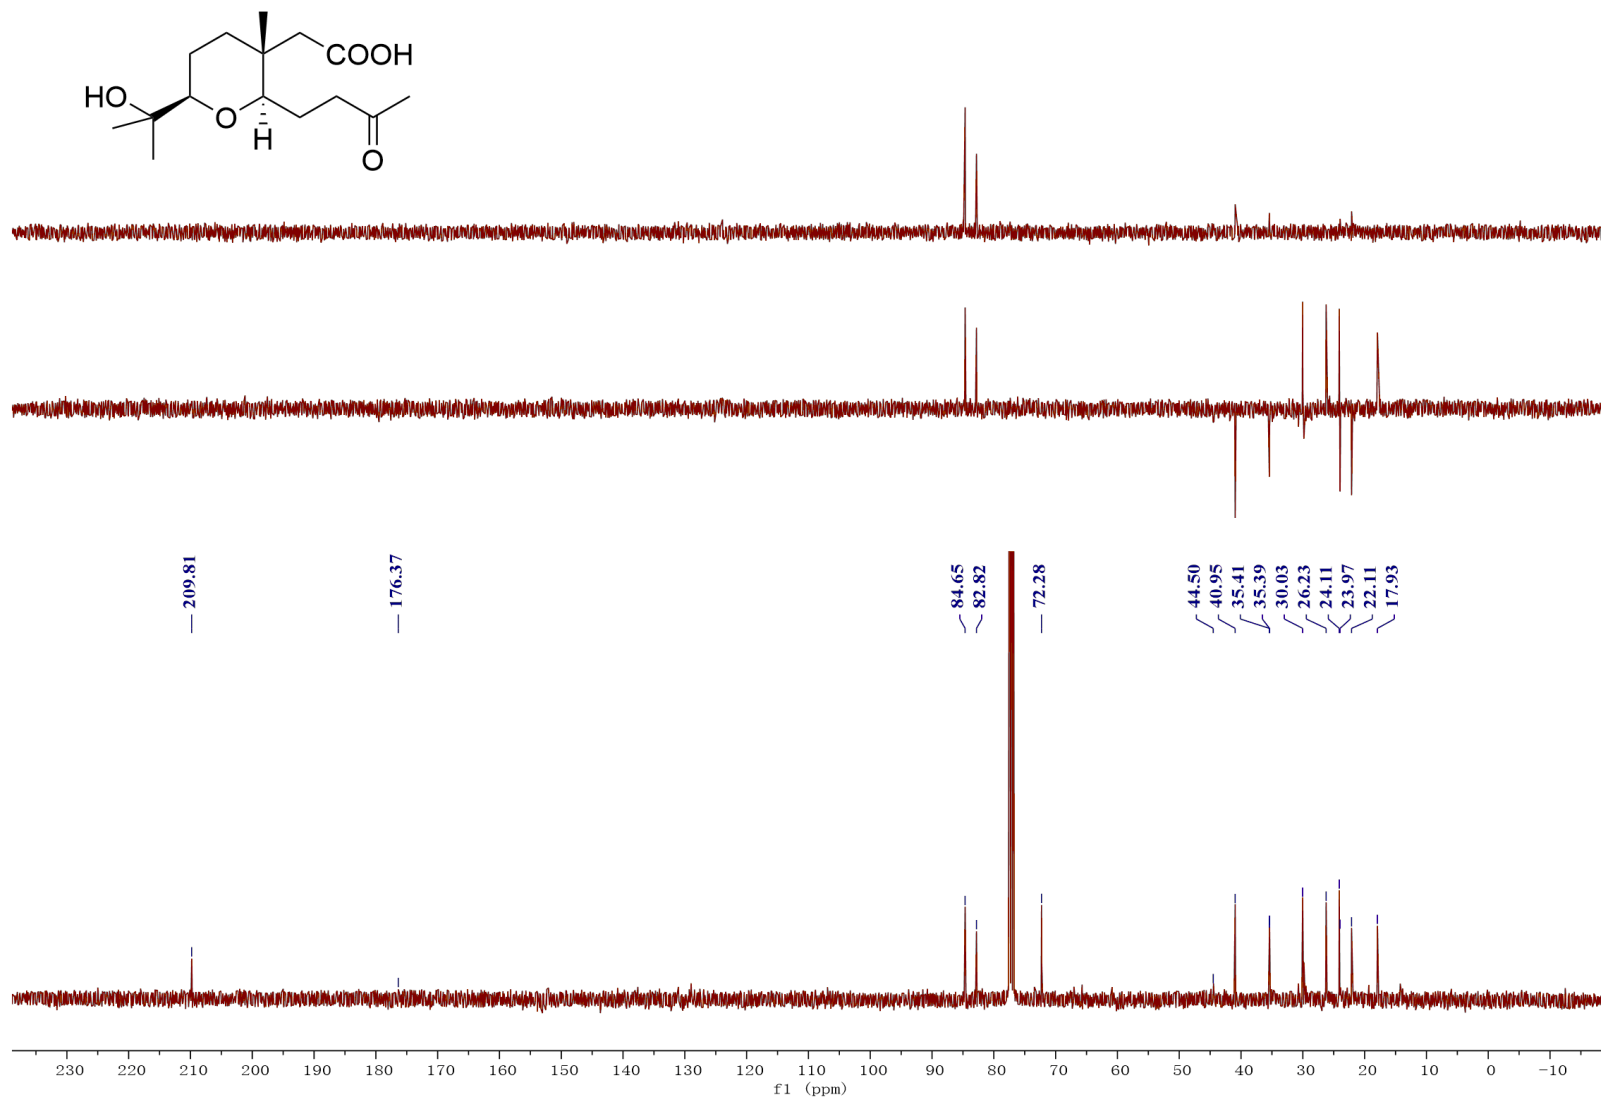

**Fig. S58.**  $^{13}\text{C}$  and DEPT spectra ( $\text{CDCl}_3$ , 150 MHz) of **9**

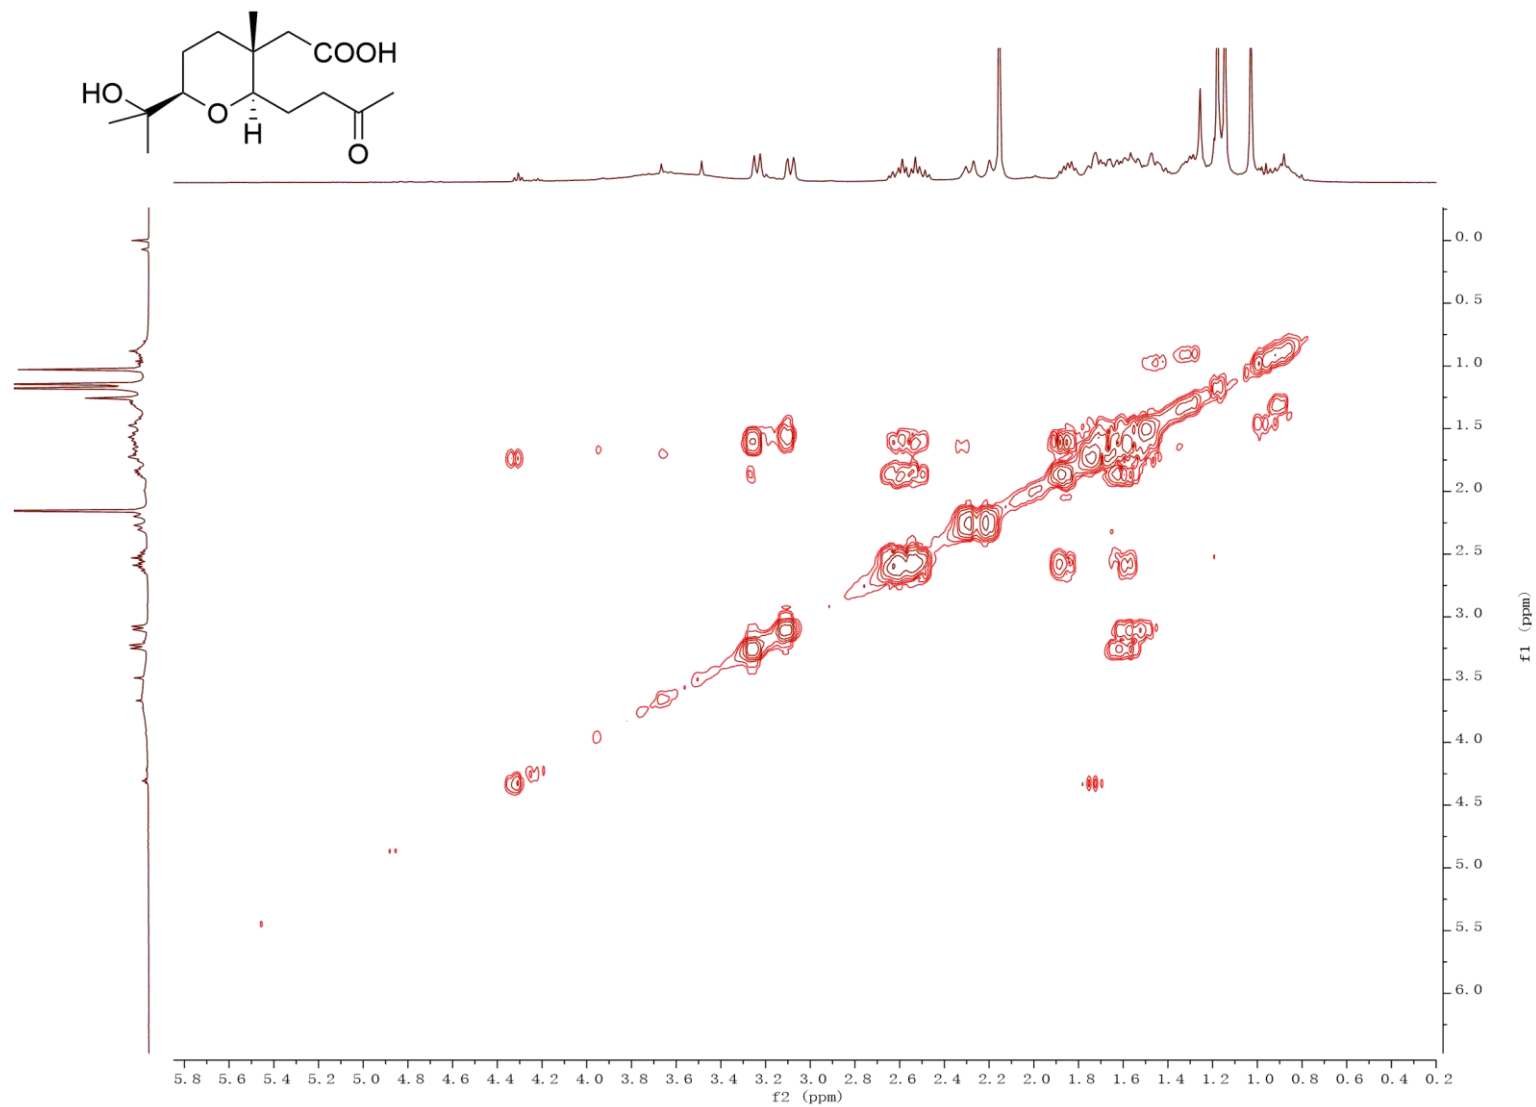

**Fig. S59.**  $^1\text{H}$ - $^1\text{H}$  COSY spectrum ( $\text{CDCl}_3$ , 600 MHz) of **9**

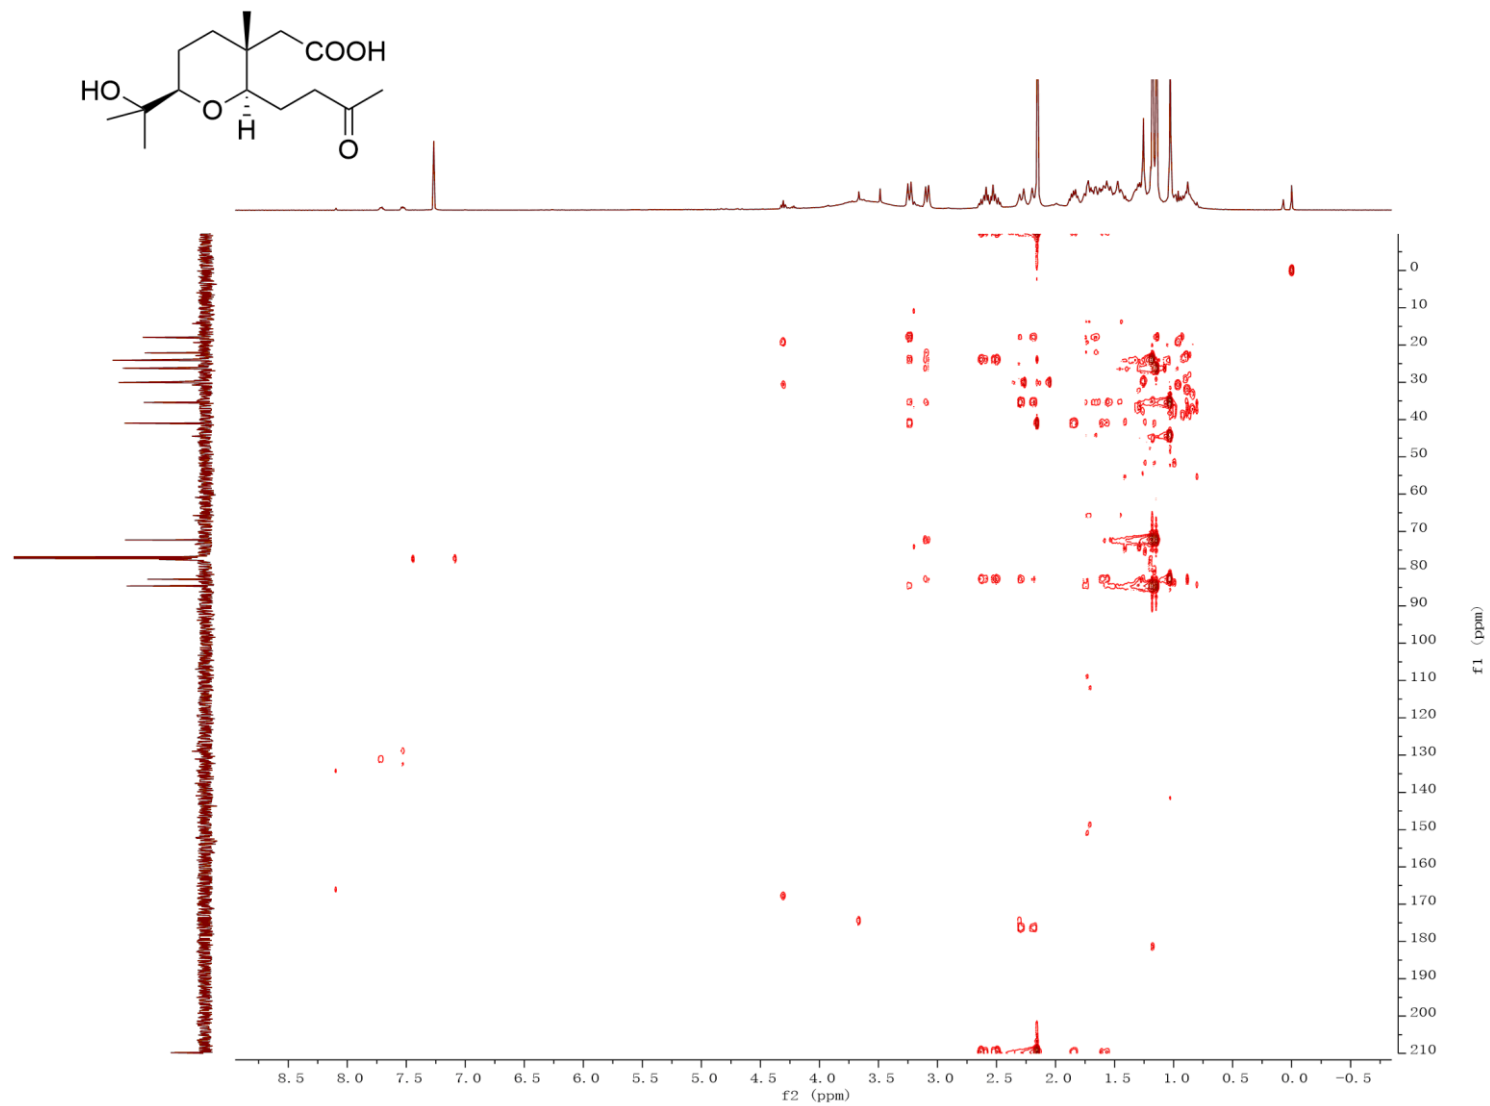

**Fig. S60.** HMBC spectrum (CDCl<sub>3</sub>, 600 MHz) of **9**

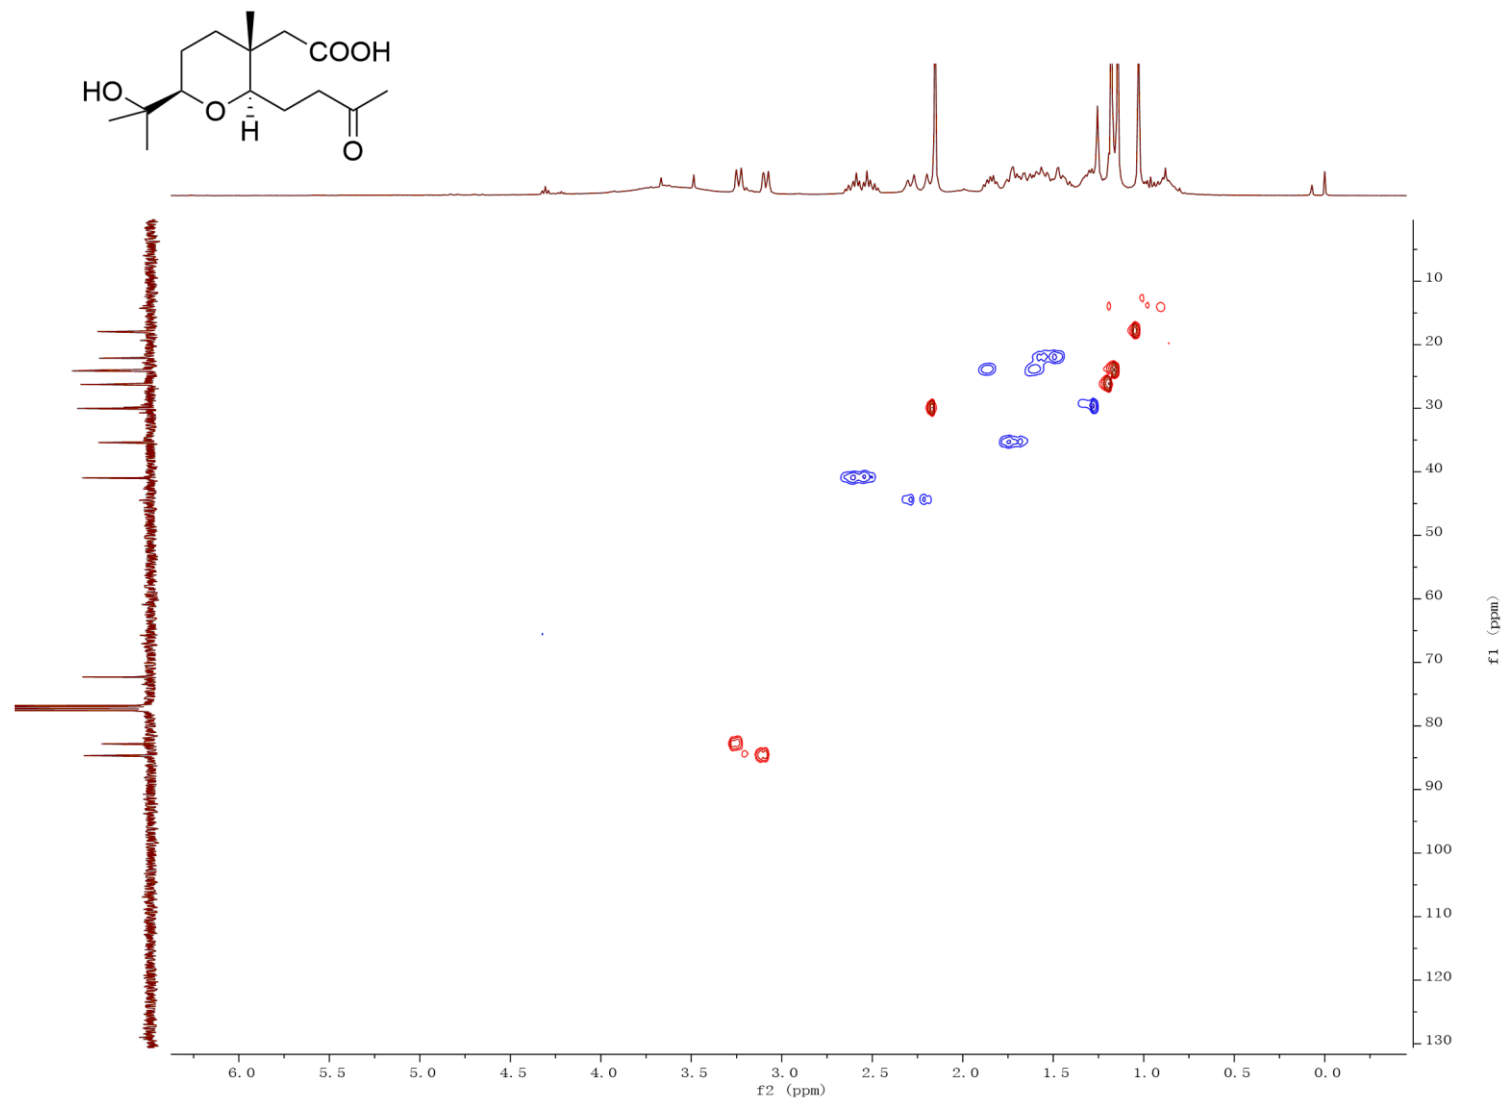

**Fig. S61.** HSQC spectrum (CDCl<sub>3</sub>, 600 MHz) of **9**

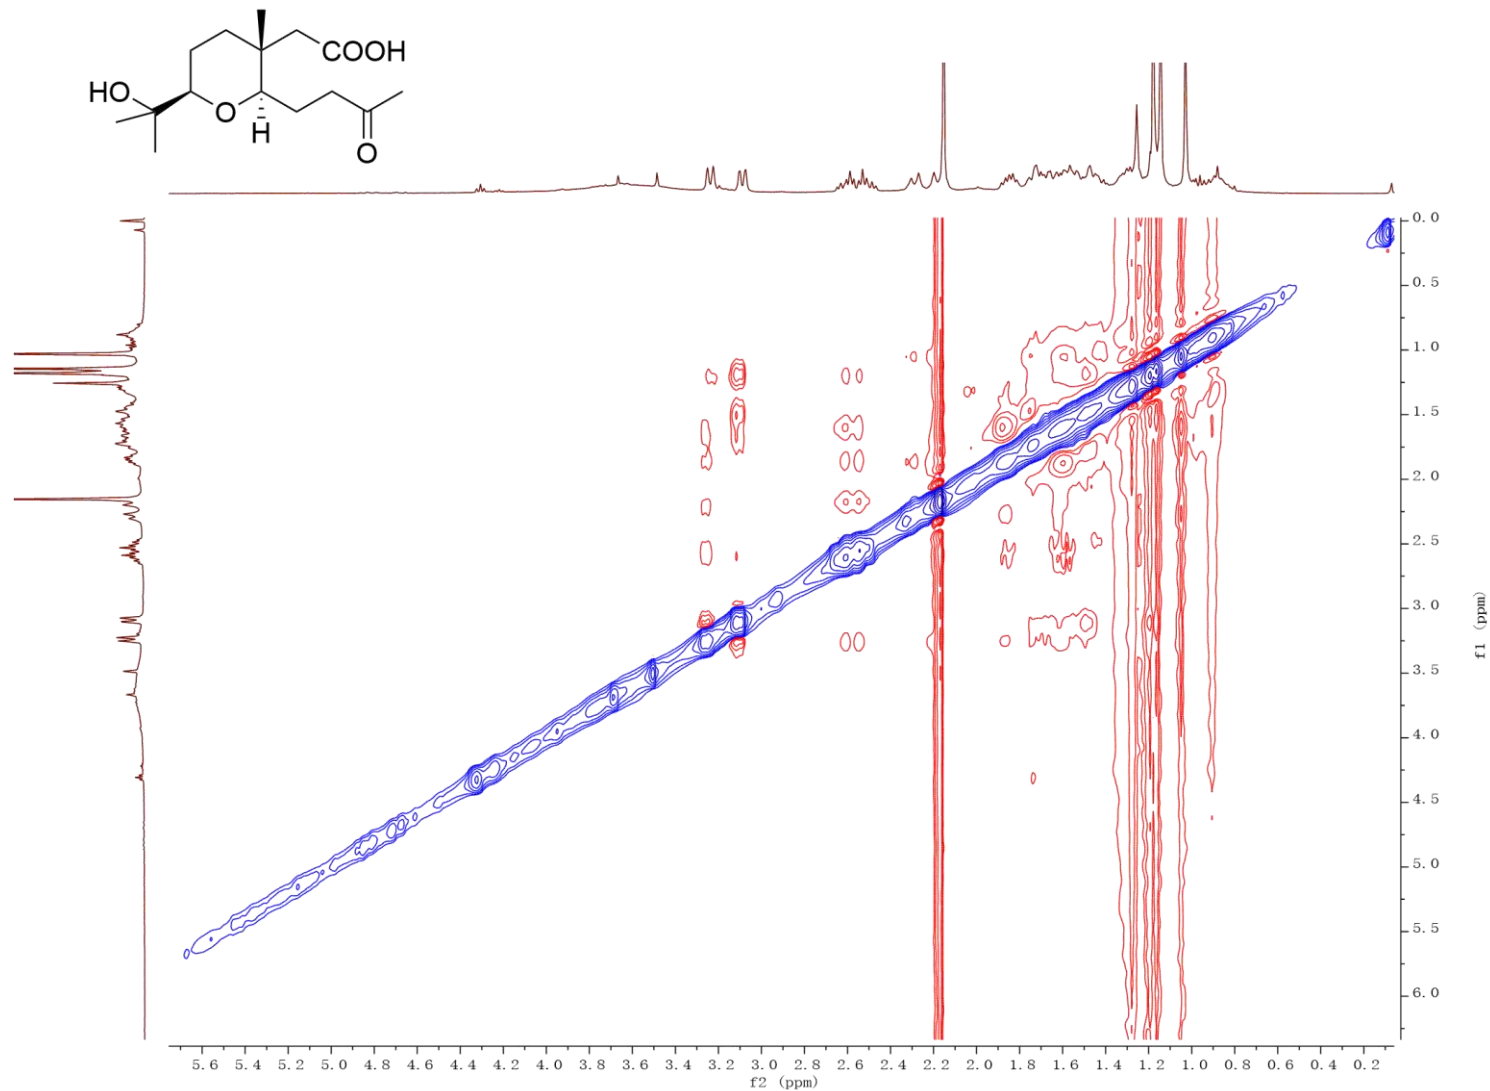

**Fig. S62.** NOESY spectrum (CDCl<sub>3</sub>, 600 MHz) of **9**

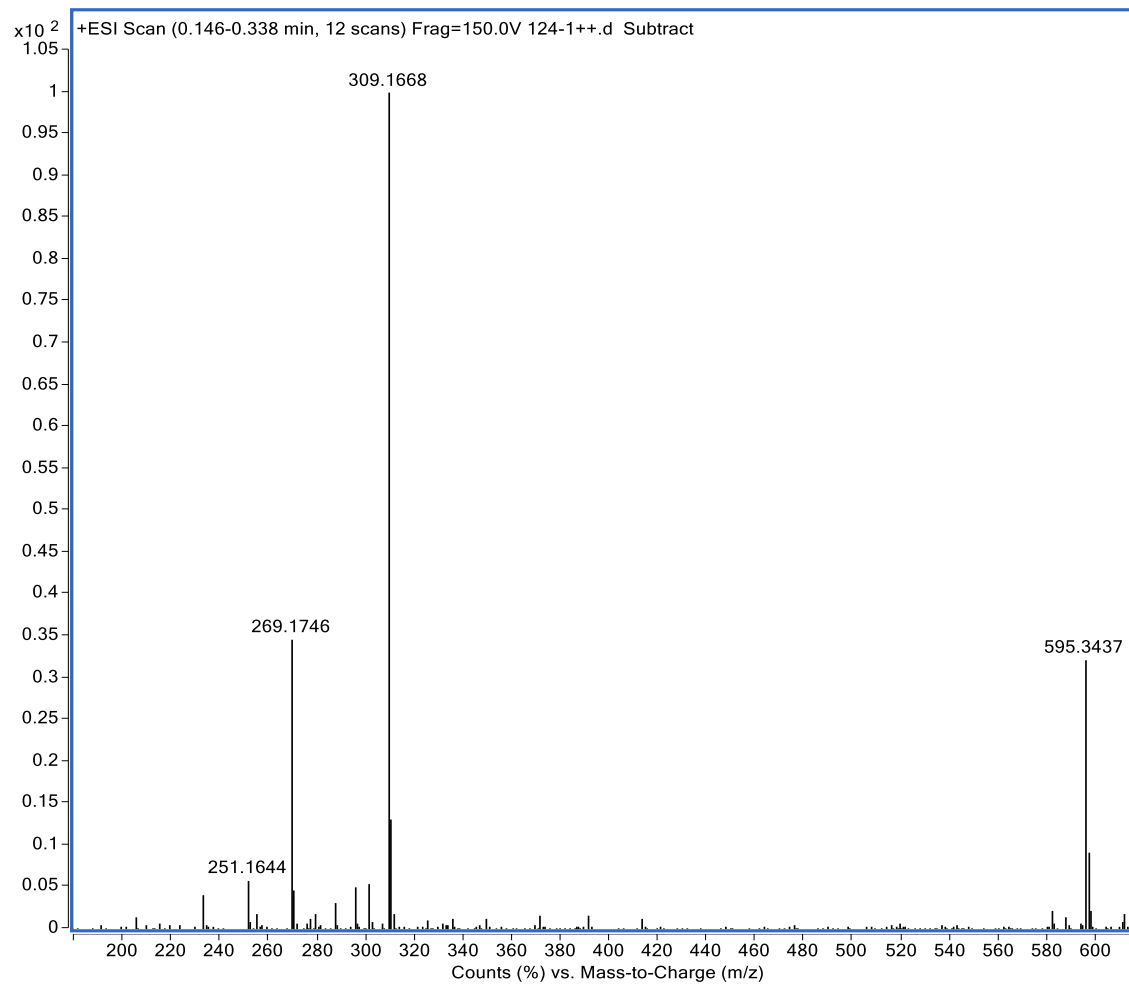

**Fig. S63.** (+)-HR-ESI-MS (positive mode) of **9**

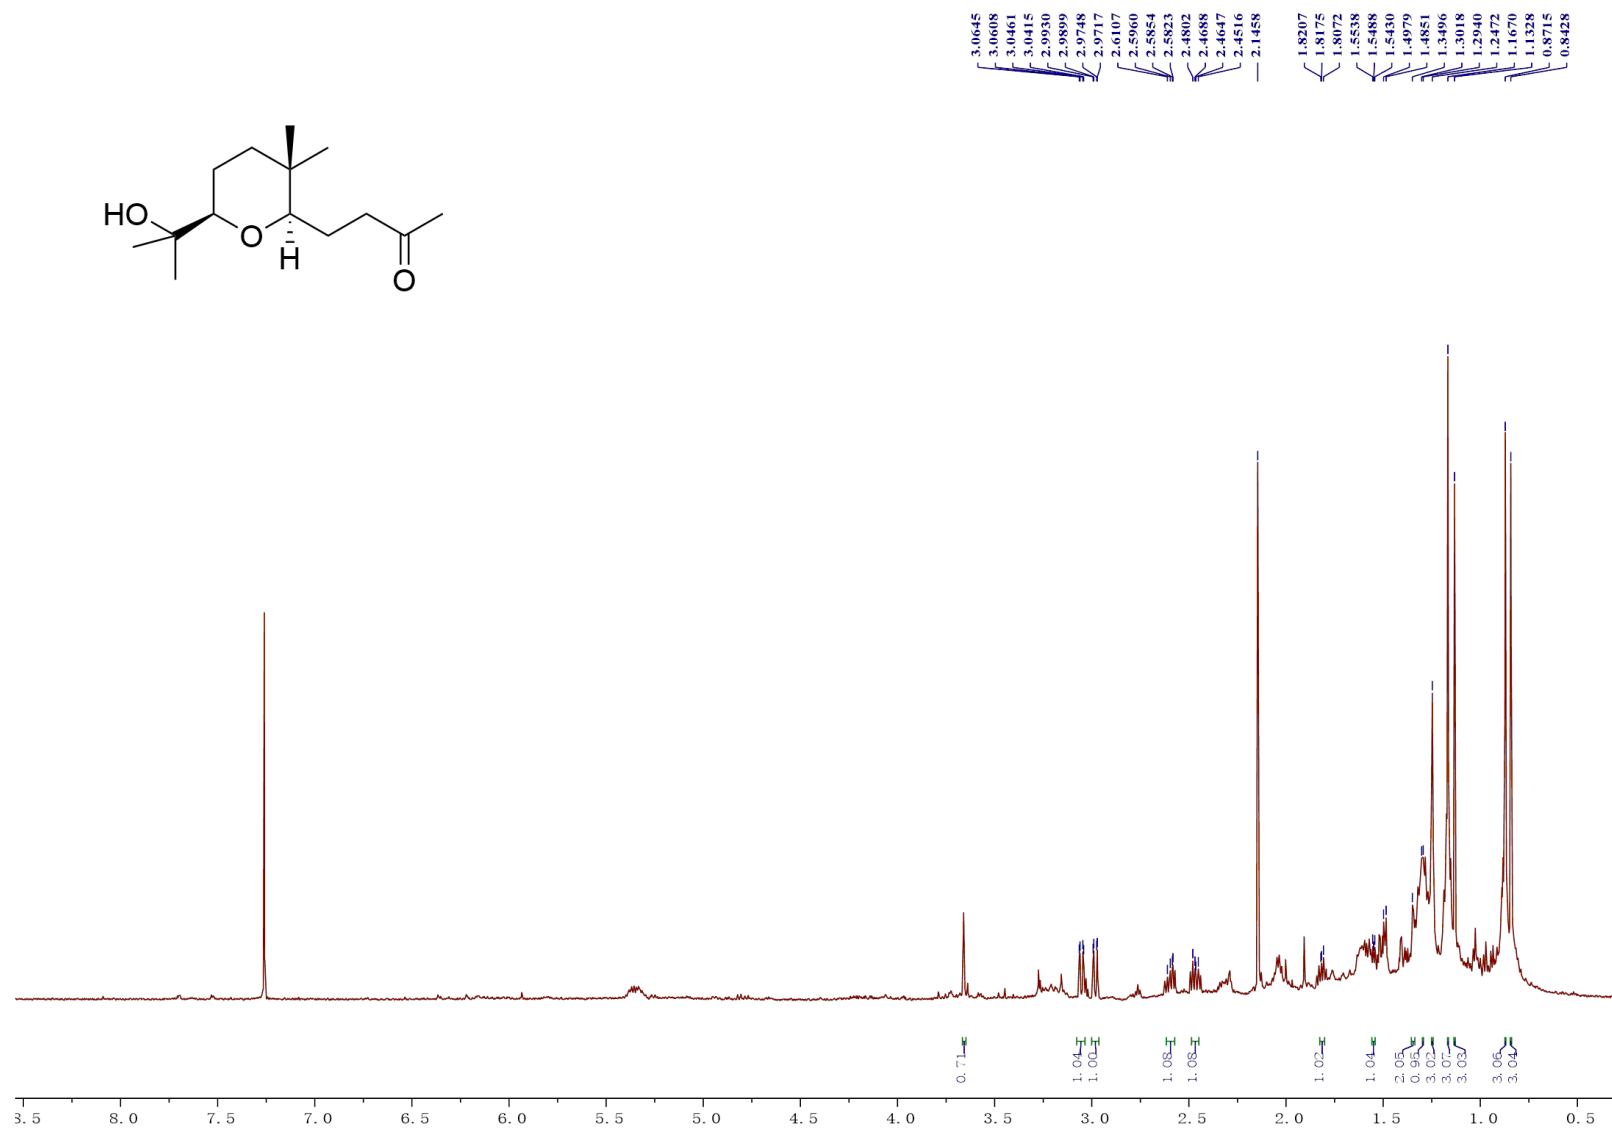

**Fig. S64.** <sup>1</sup>H NMR spectrum (CDCl<sub>3</sub>, 600 MHz) of **10**

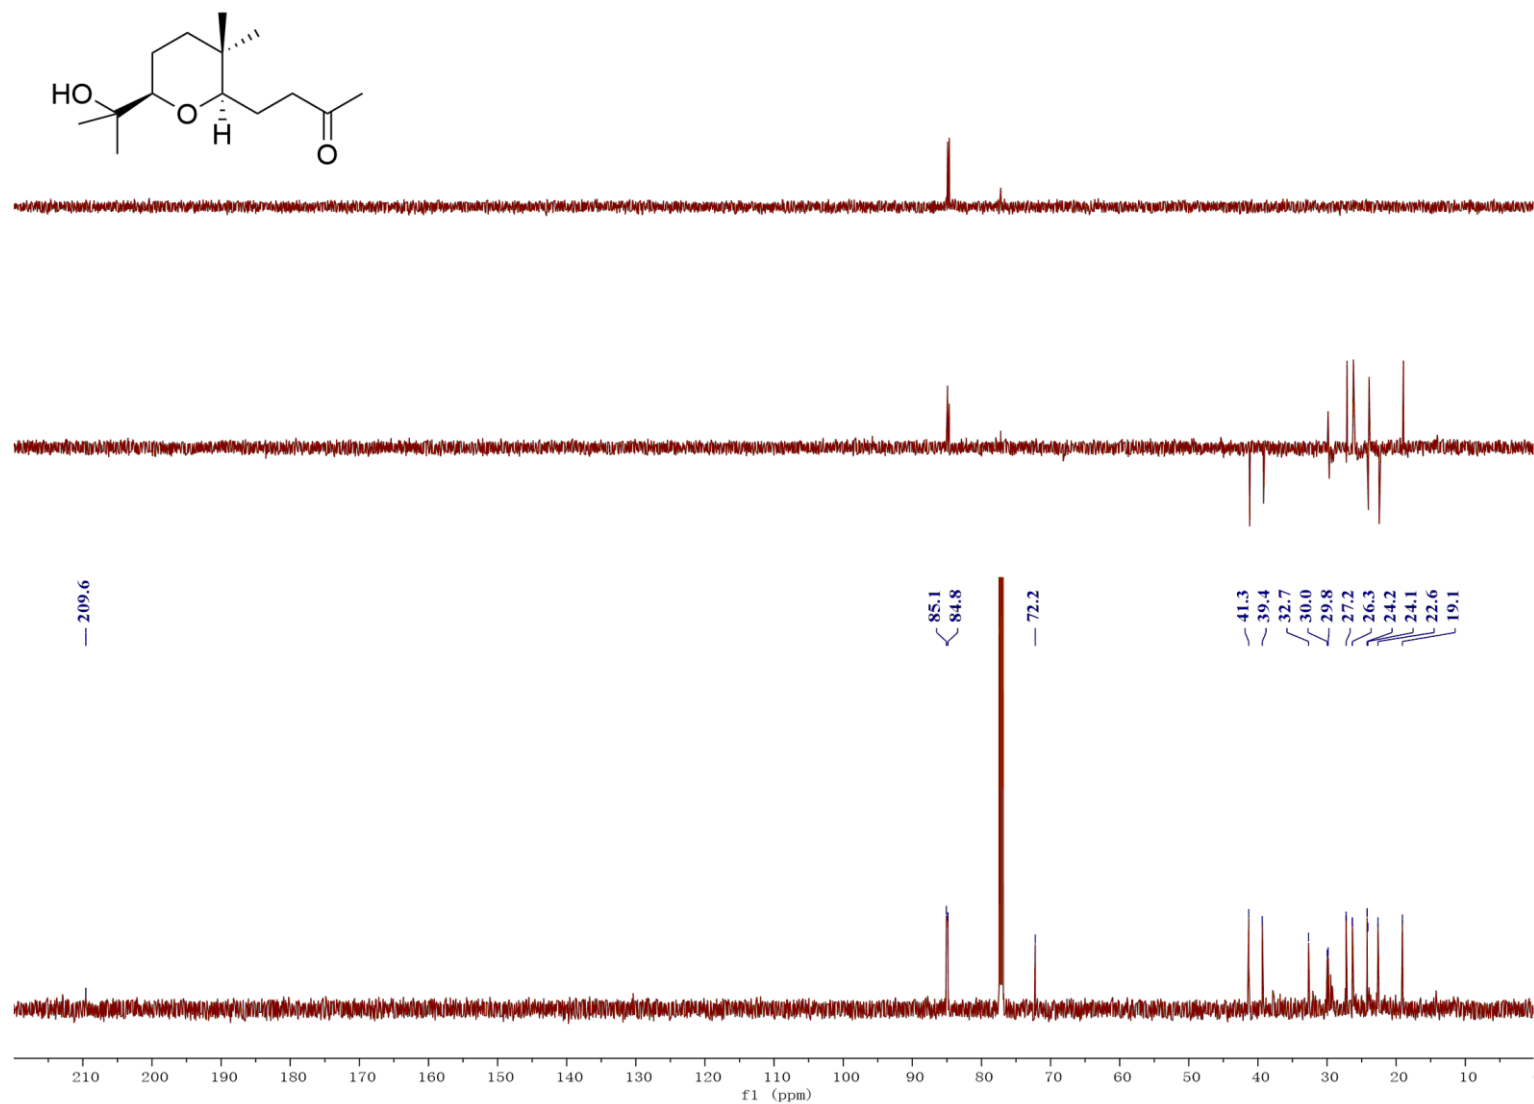

**Fig. S65.**  $^{13}\text{C}$  and DEPT spectra ( $\text{CDCl}_3$ , 150 MHz) of **10**



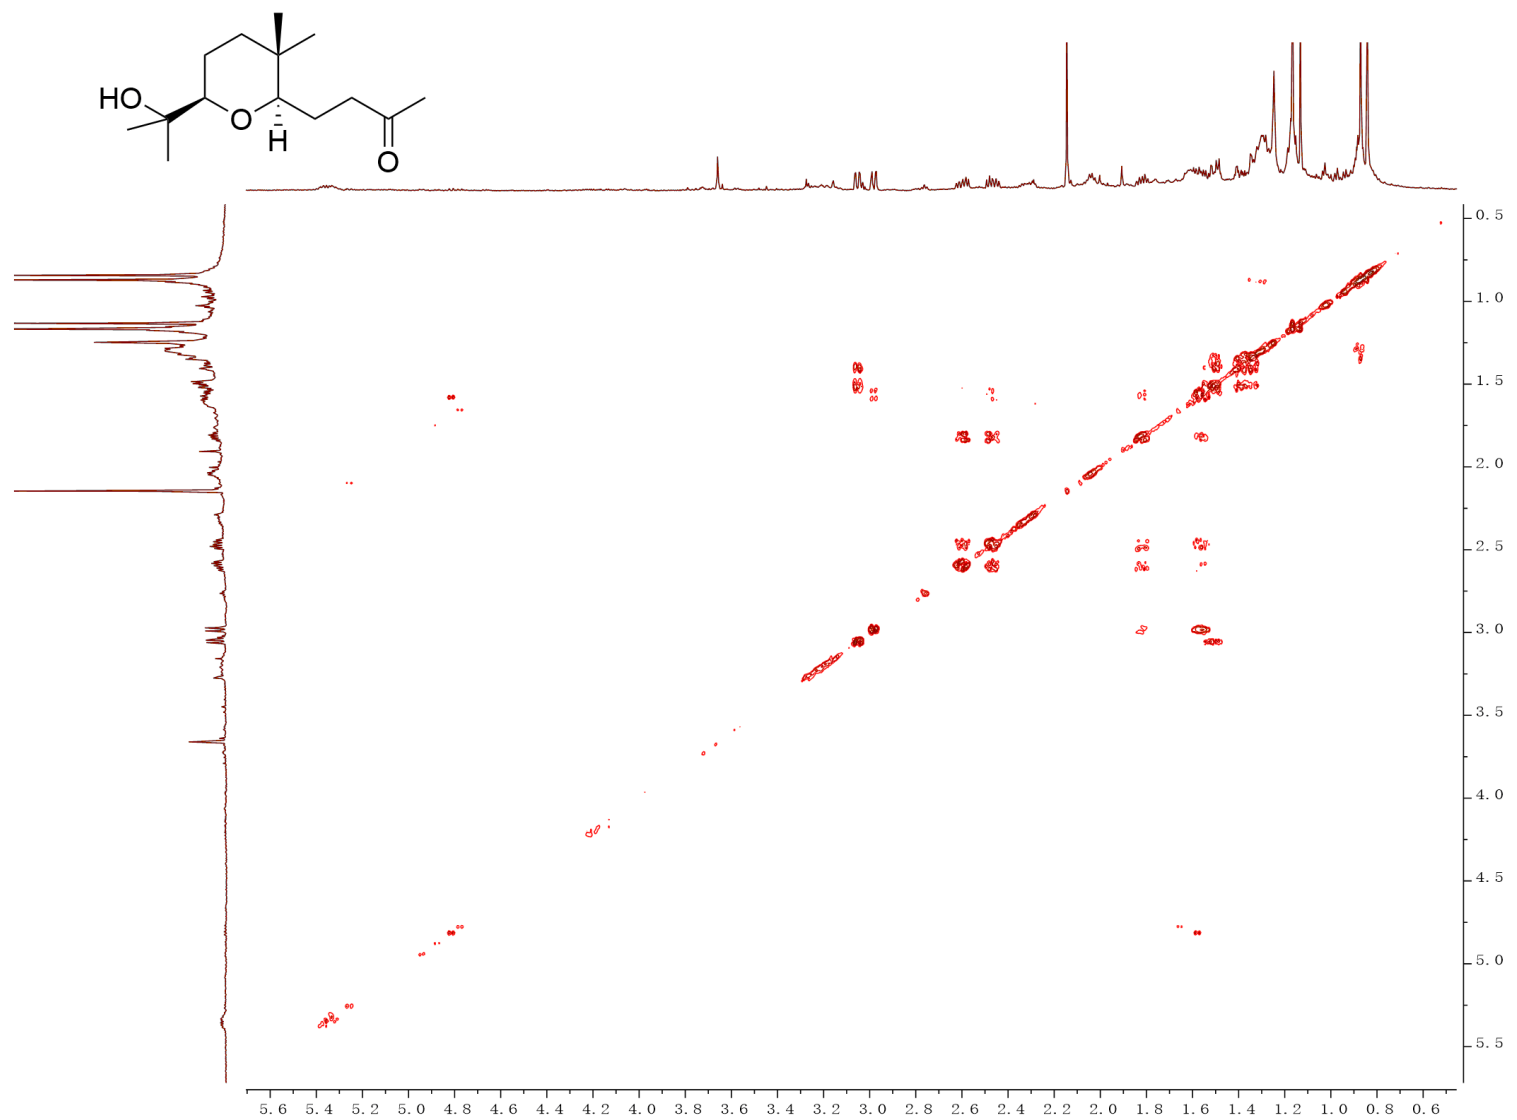

**Fig. S66.**  $^1\text{H}$ - $^1\text{H}$  COSY spectrum ( $\text{CDCl}_3$ , 600 MHz) of **10**

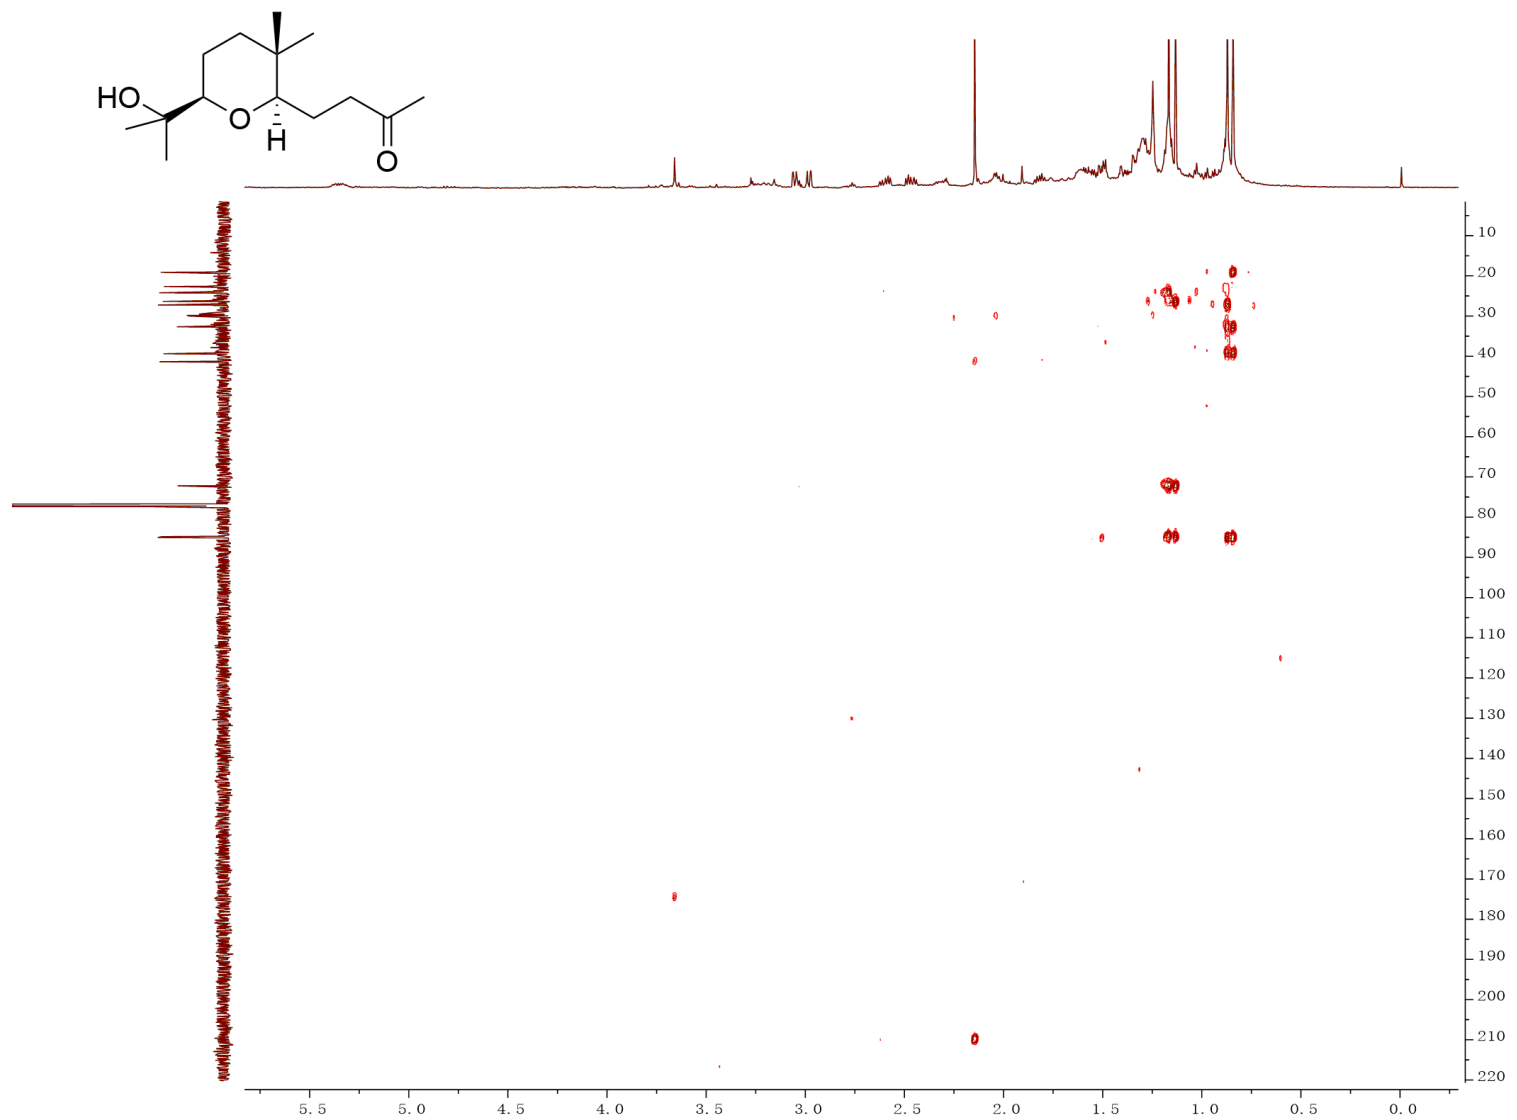

**Fig. S67.** HMBC spectrum (CDCl<sub>3</sub>, 600 MHz) of **10**

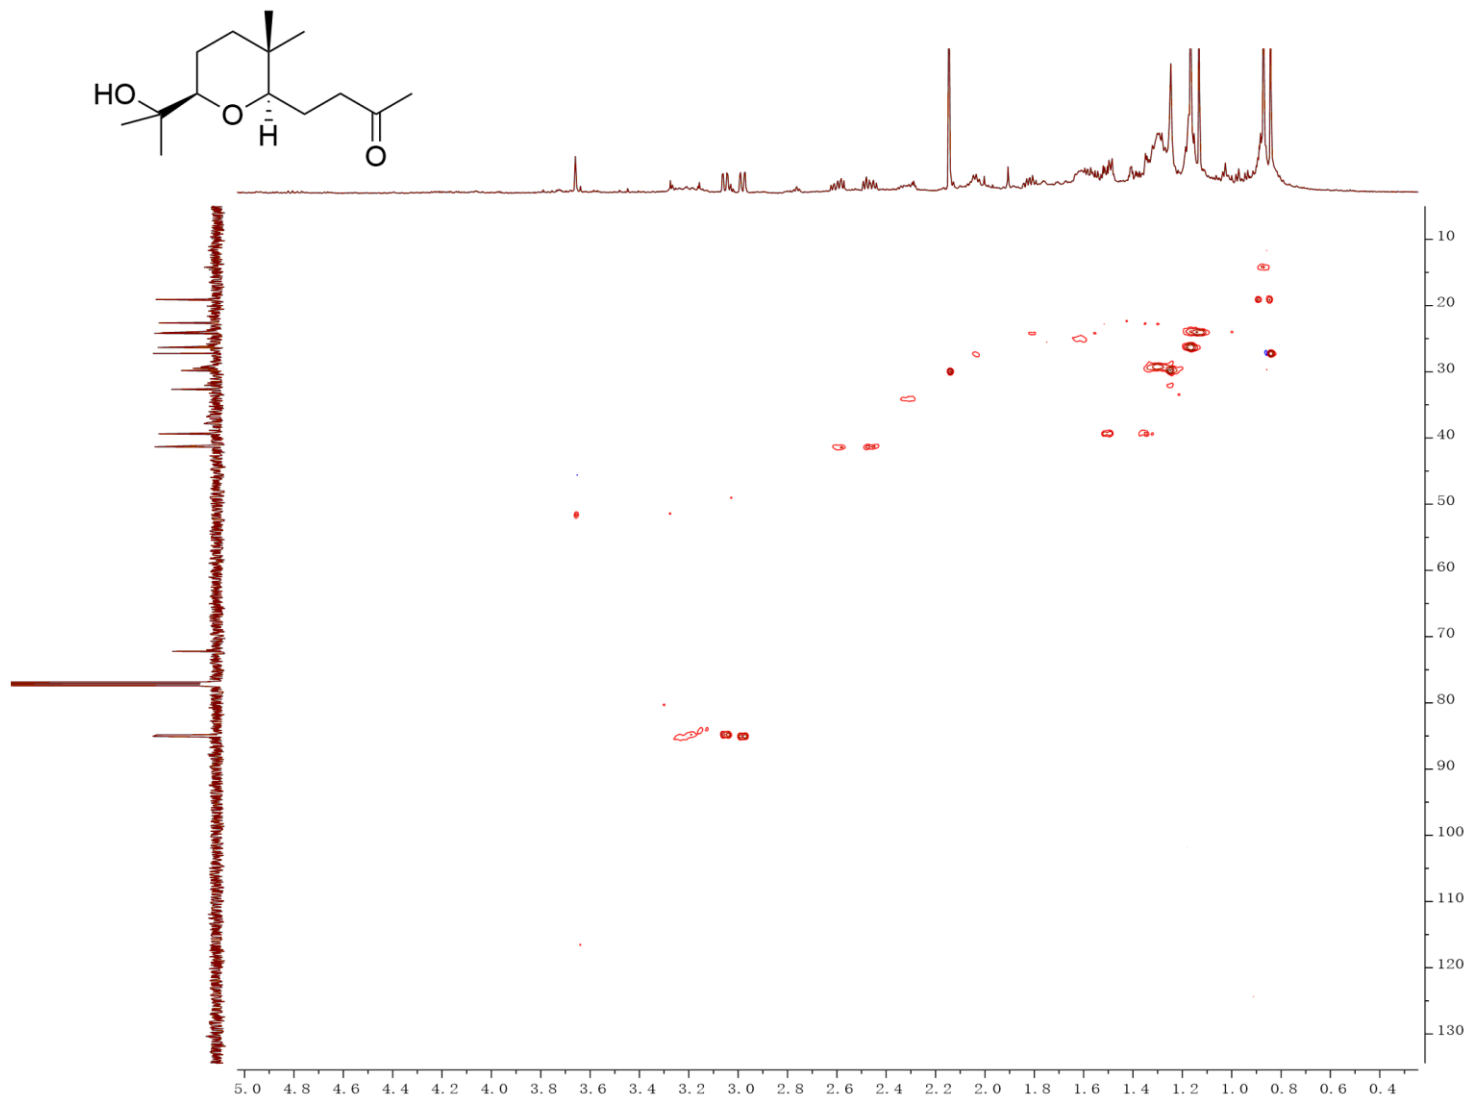

**Fig. S68.** HSQC spectrum (CDCl<sub>3</sub>, 600 MHz) of **10**

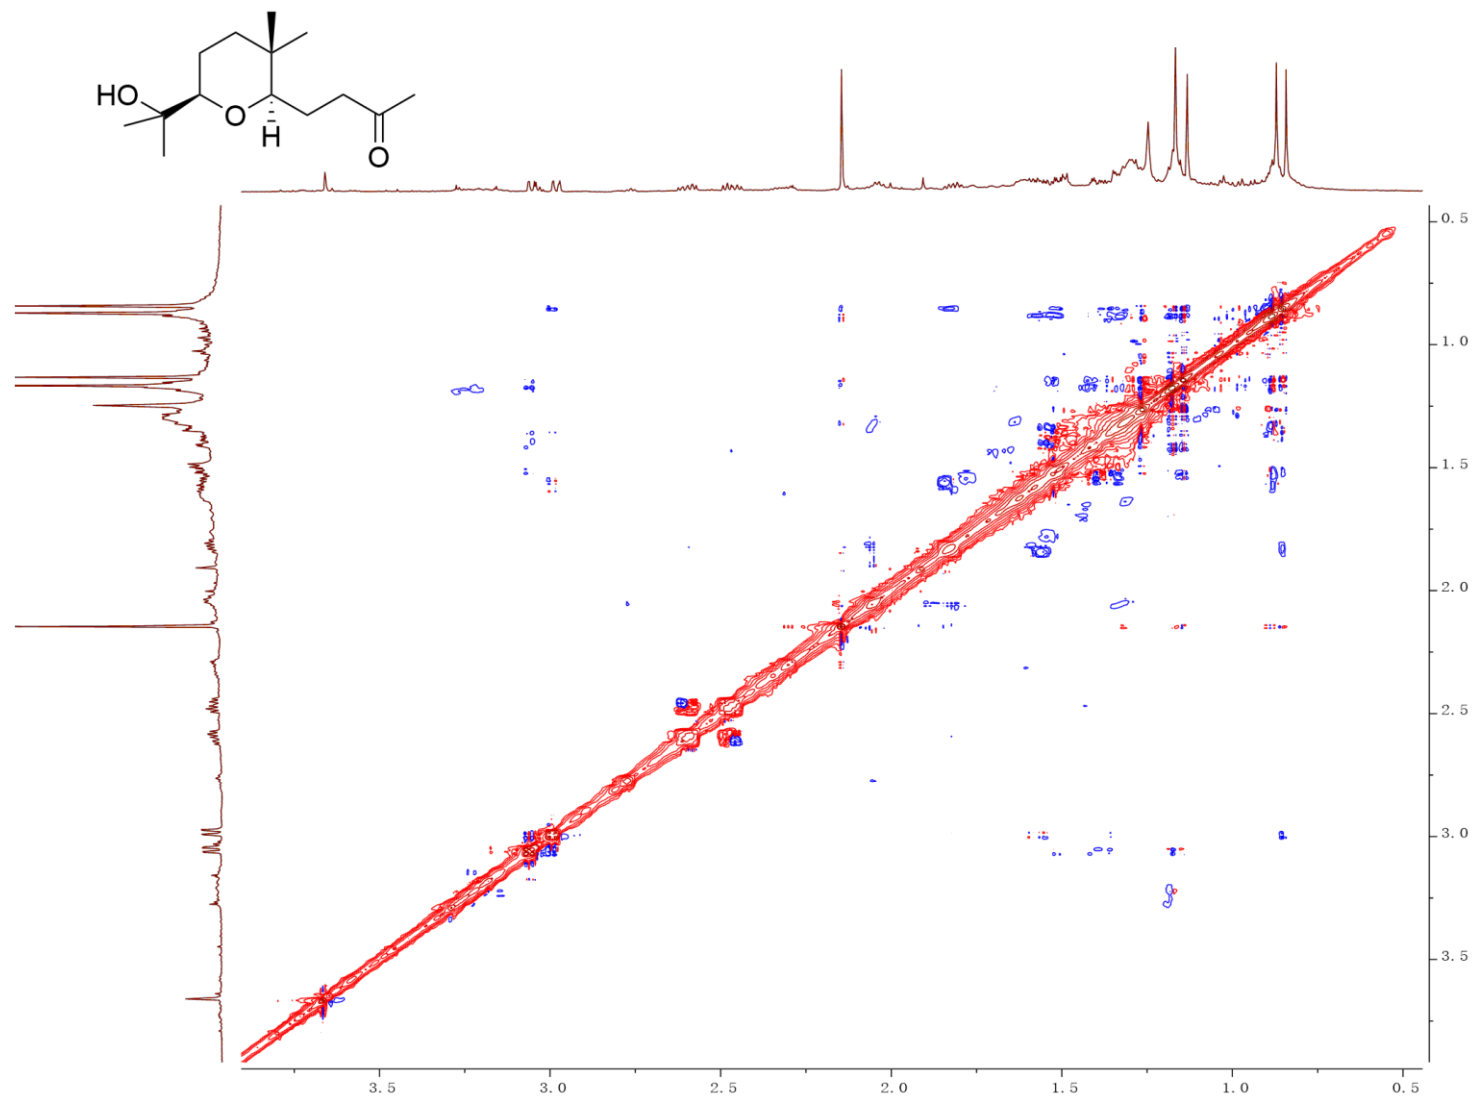

**Fig. S69.** NOESY spectrum (CDCl<sub>3</sub>, 600 MHz) of **10**

DJ1-III311 #58 RT: 1.03 AV: 1 NL: 5.33E7  
T: FTMS + c ESI Full ms [100.00-850.00]

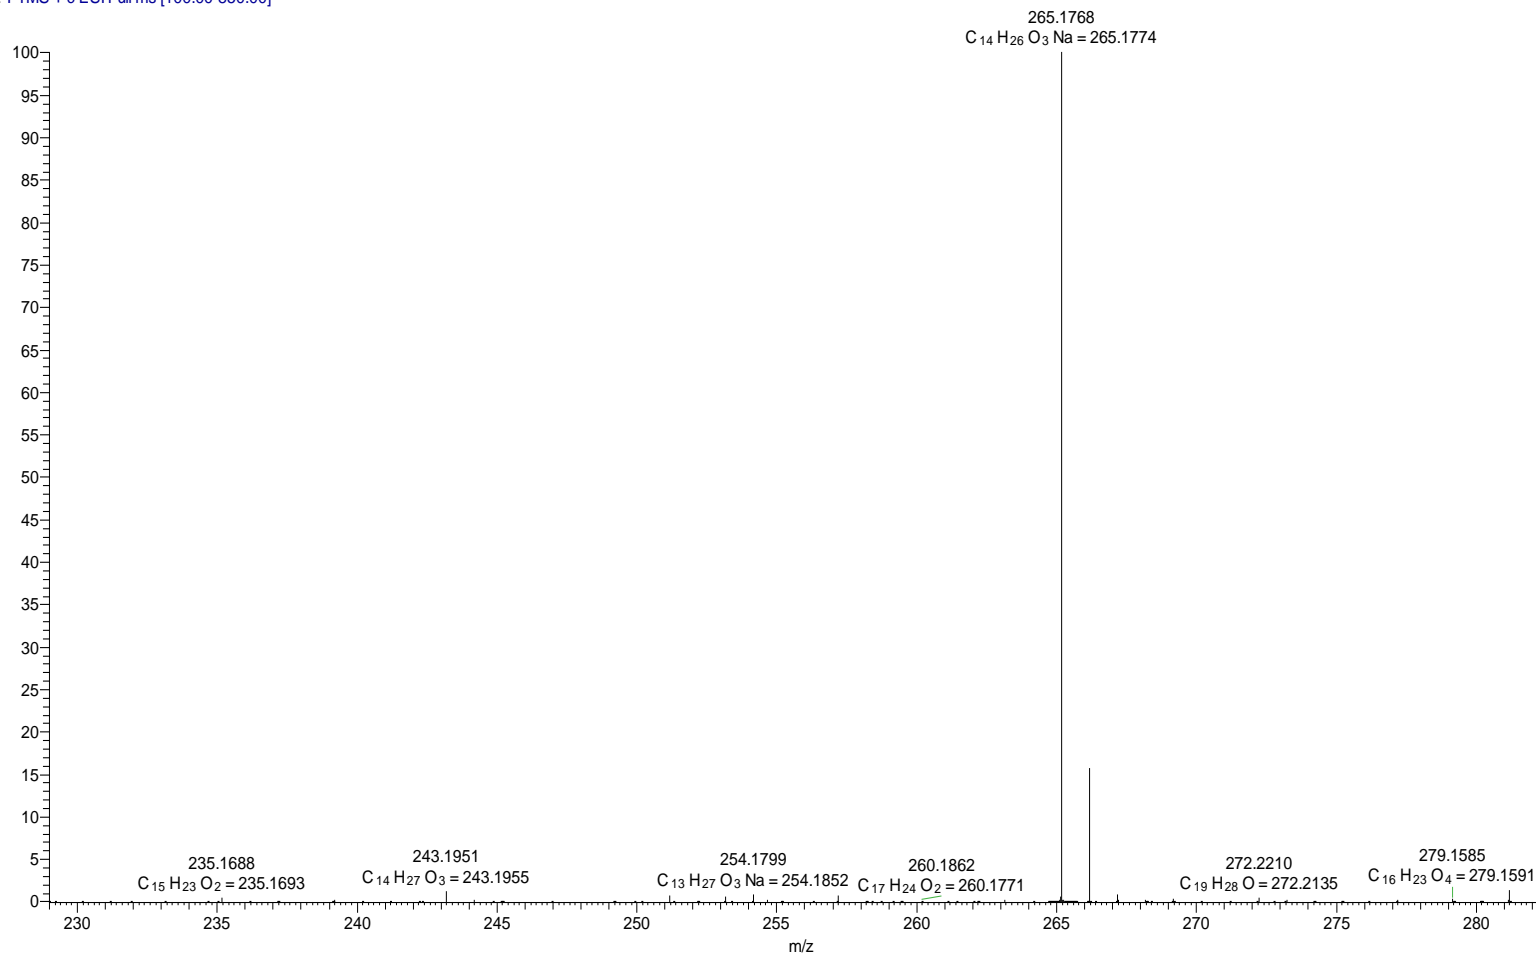

**Fig. S70.** (+)-HR-ESI-MS (positive mode) of **10**

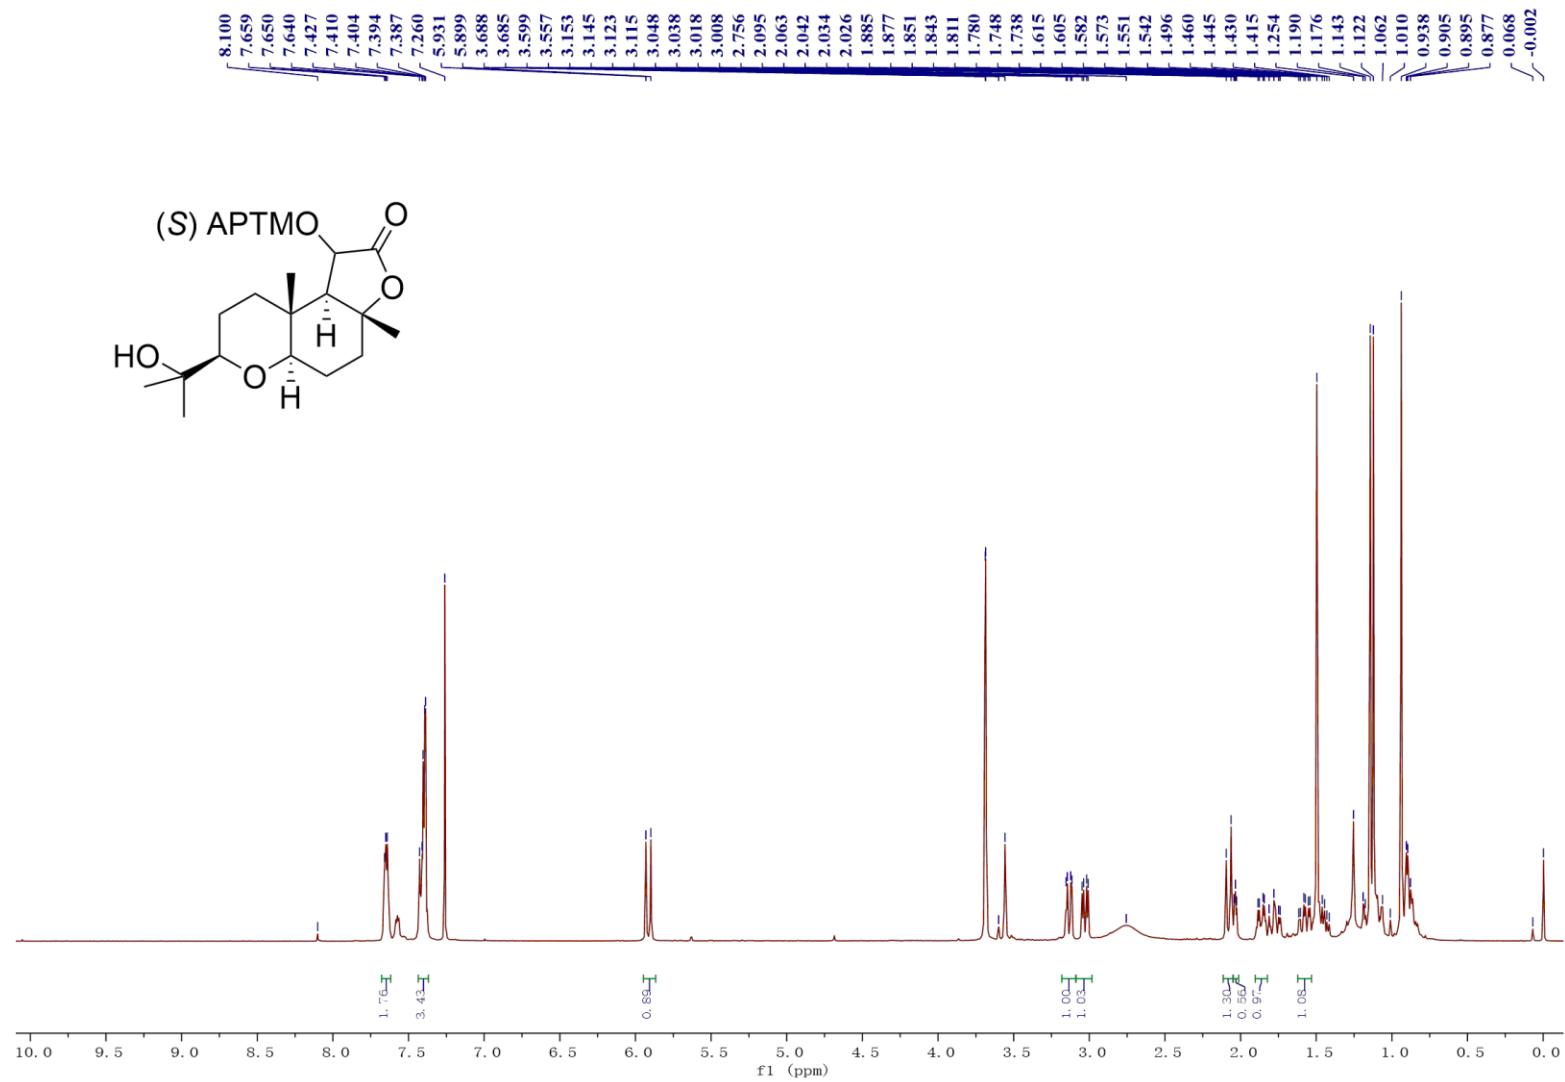

**Fig. S71.**  $^1\text{H}$  NMR spectrum of S-MTPA ester of **1**

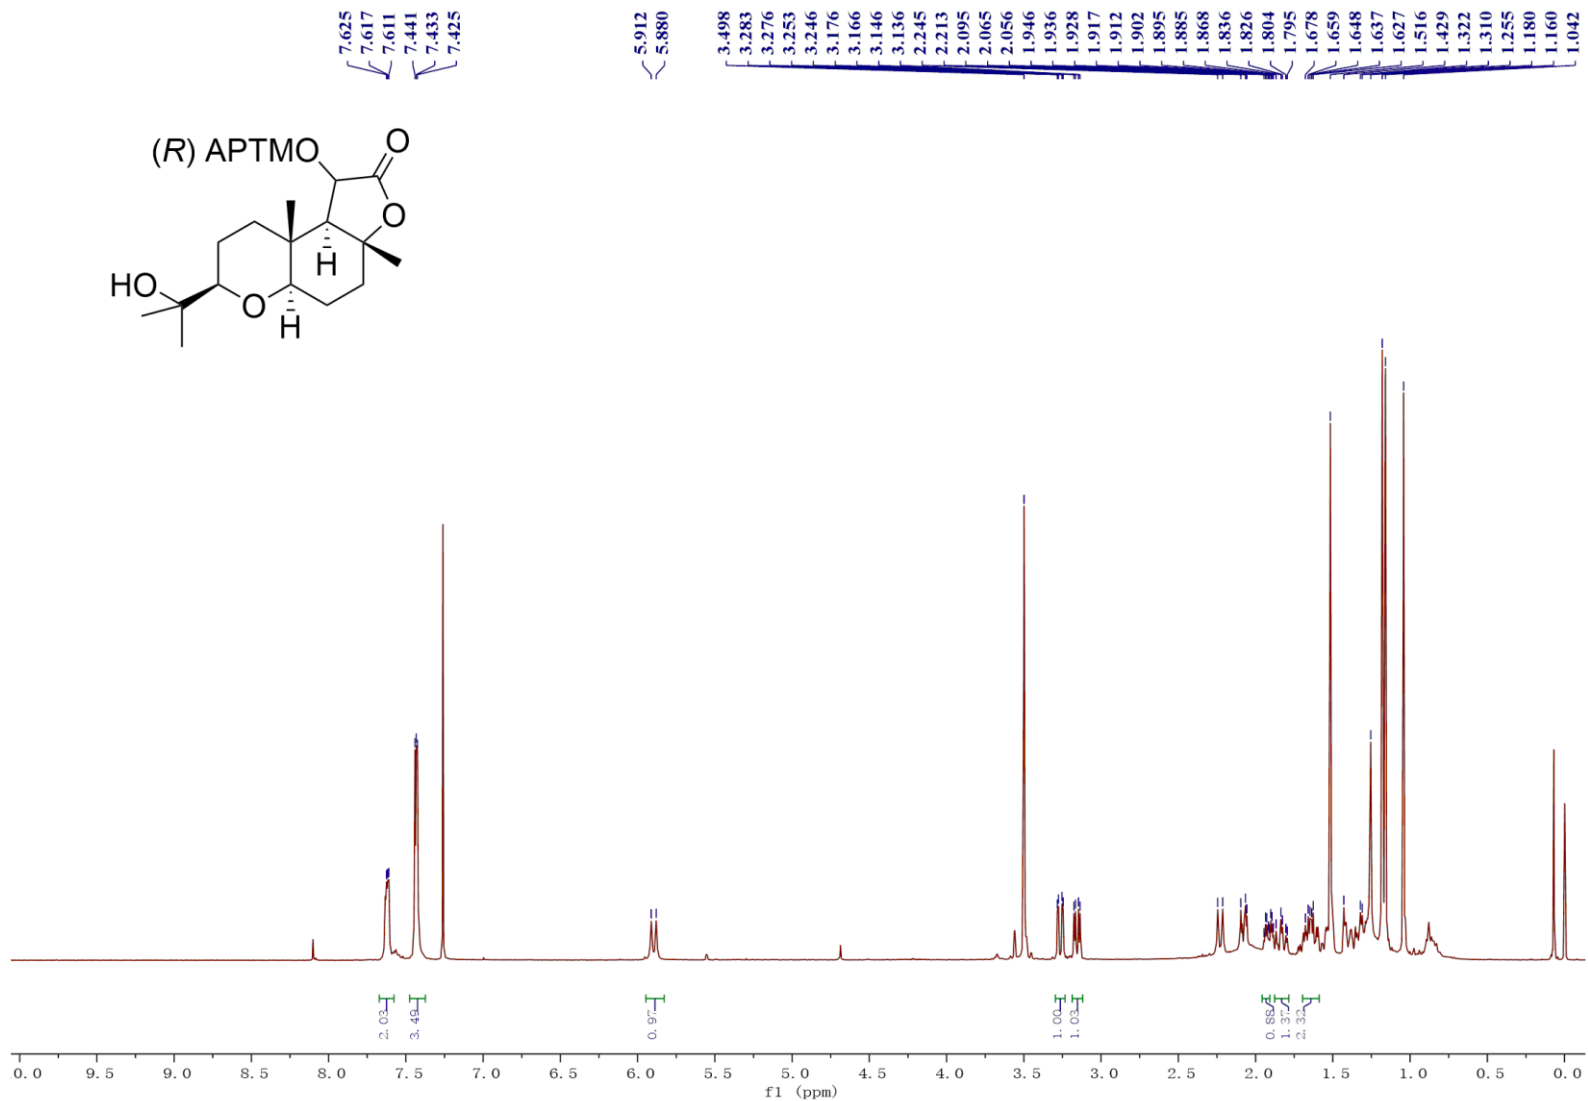

**Fig. S72.** <sup>1</sup>H NMR spectrum of *R*-MTPA ester of **1**

|    | A          | B    | C          | D        | E           | F        | G                 | H        |
|----|------------|------|------------|----------|-------------|----------|-------------------|----------|
| 1  | Functional |      | Solvent?   |          | Basis Set   |          | Type of Data      |          |
| 2  | mPW1PW91   |      | PC1        |          | 6-31+G(d,p) |          | Shielding Tensors |          |
| 3  |            |      |            |          |             |          |                   |          |
| 12 |            |      | DP4+       | 0.00%    | 100.00%     | -        | -                 | -        |
| 14 | Nuclei     | sp2? | xperimenta | Isomer 1 | Isomer 2    | Isomer 3 | Isomer 4          | Isomer 5 |
| 15 | C          |      | 40.6       | 43.6     | 44.5        |          |                   |          |
| 16 | C          | x    | 138.5      | 146.7    | 150.9       |          |                   |          |
| 17 | C          | x    | 137.8      | 148.3    | 143.3       |          |                   |          |
| 18 | C          |      | 198.5      | 209.9    | 205.3       |          |                   |          |
| 19 | C          |      | 26.9       | 51.9     | 29.9        |          |                   |          |
| 20 | C          |      | 79         | 82.2     | 81.6        |          |                   |          |
| 21 | C          |      | 31.6       | 39.6     | 34.5        |          |                   |          |
| 22 | C          |      | 37.9       | 42.3     | 40.8        |          |                   |          |
| 23 | C          |      | 22.3       | 25.2     | 25.5        |          |                   |          |
| 24 | C          |      | 84.6       | 87.8     | 87.6        |          |                   |          |
| 25 | C          |      | 72         | 74.1     | 74.3        |          |                   |          |
| 26 | C          |      | 26.1       | 27.12    | 27.47       |          |                   |          |
| 27 | C          |      | 23.9       | 24.27    | 24.45       |          |                   |          |
| 28 | C          |      | 16.5       | 17.85    | 17.60       |          |                   |          |
| 29 | C          |      | 25.5       | 24.54    | 28.12       |          |                   |          |
| 30 |            |      |            |          |             |          |                   |          |
| 31 | H          |      | 2.14       | 2.19     | 2.22        |          |                   |          |
| 32 | H          |      | 2.03       | 2.09     | 2.16        |          |                   |          |
| 33 | H          | x    | 6.74       | 6.62     | 7.37        |          |                   |          |
| 34 | H          |      | 1.98       | 2.65     | 2.03        |          |                   |          |
| 35 | H          |      | 2.63       | 2.88     | 2.70        |          |                   |          |
| 36 | H          |      | 3.32       | 3.48     | 3.35        |          |                   |          |
| 37 | H          |      | 1.35       | 1.40     | 1.38        |          |                   |          |
| 38 | H          |      | 1.72       | 1.55     | 1.72        |          |                   |          |
| 39 | H          |      | 1.49       | 1.38     | 1.43        |          |                   |          |
| 40 | H          |      | 1.62       | 1.62     | 1.74        |          |                   |          |
| 41 | H          |      | 3.2        | 3.19     | 3.22        |          |                   |          |
| 42 | H          |      | 1.18       | 1.14     | 1.16        |          |                   |          |
| 43 | H          |      | 1.17       | 1.11     | 1.11        |          |                   |          |
| 44 | H          |      | 0.85       | 1.1      | 0.91        |          |                   |          |
| 45 | H          |      | 2.3        | 1.9      | 2.34        |          |                   |          |
| 46 |            |      |            |          |             |          |                   |          |

  

|    | A                | B | C        | D        | E           | F        | G                 | H        |
|----|------------------|---|----------|----------|-------------|----------|-------------------|----------|
| 1  | Functional       |   | Solvent? |          | Basis Set   |          | Type of Data      |          |
| 2  | mPW1PW91         |   | PC1      |          | 6-31+G(d,p) |          | Shielding Tensors |          |
| 3  |                  |   |          |          |             |          |                   |          |
| 4  |                  |   |          | Isomer 1 | Isomer 2    | Isomer 3 | Isomer 4          | Isomer 5 |
| 5  | sDP4+ (H data)   |   | 0.00%    | 100.00%  | -           | -        | -                 | -        |
| 6  | sDP4+ (C data)   |   | 0.00%    | 100.00%  | -           | -        | -                 | -        |
| 7  | sDP4+ (all data) |   | 0.00%    | 100.00%  | -           | -        | -                 | -        |
| 8  | uDP4+ (H data)   |   | 46.40%   | 53.60%   | -           | -        | -                 | -        |
| 9  | uDP4+ (C data)   |   | 75.32%   | 24.68%   | -           | -        | -                 | -        |
| 10 | uDP4+ (all data) |   | 72.54%   | 27.46%   | -           | -        | -                 | -        |
| 11 | DP4+ (H data)    |   | 0.00%    | 100.00%  | -           | -        | -                 | -        |
| 12 | DP4+ (C data)    |   | 0.00%    | 100.00%  | -           | -        | -                 | -        |
| 13 | DP4+ (all data)  |   | 0.00%    | 100.00%  | -           | -        | -                 | -        |

Fig. S73. DP4+ analysis of **3a** (Isomer 1) and **3b** (Isomer 2).



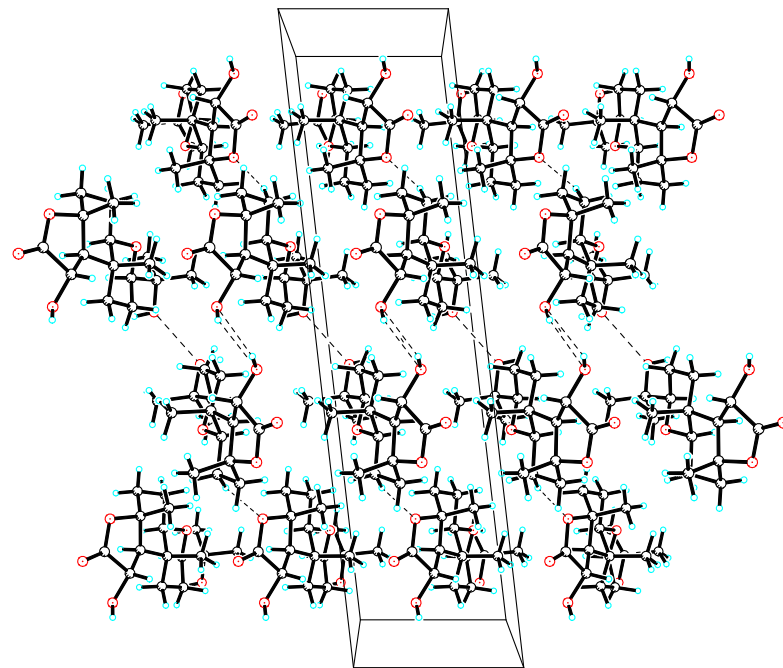

**Fig. 74.** View of the pack drawing of bipodonine A (**1**).
